# Supplementary material for: Integrated photodetectors for compact Fourier-transform waveguide spectrometers
Source: Nat Photonics. 2022 Oct 24;17(1):59–64. doi: 10.1038/s41566-022-01088-7 (PMC9822831; doi:10.1038/s41566-022-01088-7)
Supplement: Source Data Extended Data Fig. 9 — Plot of raw data; same source data as Extended Data Fig. 8. [file 41566_2022_1088_MOESM6_ESM.xlsx]

## Sheet: ED-fig8&9_mirror-vibration
same raw data as used in Extended Data Figure 8
load resistance: 100kOhm
Lock-in output is coupled to piezostage 1mV equals 10nm distance
frequency: 27 Hz
Sample: R [V]	Sample: Th. [°]	Vsd set [V]	Vsd Sample [V]	Isd [A]	Laser WL [nm]	Laser I [mA]	Lock-In Ampl. [V]	Lock-In Offset [V]
2.61449e-06	-81.8591	0.05	0.0500468	1.03782e-09	1570	83.3	0.01	0
4.95009e-06	-78.3583	0.05	0.0500402	9.91134e-10	1570	83.3	0.01	0.002
8.02481e-06	-82.1475	0.05	0.0500516	9.70868e-10	1570	83.3	0.01	0.004
9.52484e-06	-83.0337	0.05	0.0500436	9.92743e-10	1570	83.3	0.01	0.006
7.77383e-06	-83.3082	0.05	0.0500462	9.89759e-10	1570	83.3	0.01	0.008
4.37817e-06	-73.5219	0.05	0.0500474	9.64749e-10	1570	83.3	0.01	0.01
5.22787e-06	-84.1737	0.05	0.0500391	1.05482e-09	1570	83.3	0.01	0.012
6.48509e-06	-84.8361	0.05	0.0500446	1.01408e-09	1570	83.3	0.01	0.014
8.41863e-06	-85.5817	0.05	0.0500426	1.01705e-09	1570	83.3	0.01	0.016
1.0532e-05	-77.9507	0.05	0.0500398	1.00129e-09	1570	83.3	0.01	0.018
1.05919e-05	-79.1113	0.05	0.0500447	1.00052e-09	1570	83.3	0.01	0.02
9.82233e-06	-80.6081	0.05	0.0500436	9.91766e-10	1570	83.3	0.01	0.022
8.2411e-06	-81.9374	0.05	0.05004	1.08616e-09	1570	83.3	0.01	0.024
7.32508e-06	-80.6516	0.05	0.0500462	1.09392e-09	1570	83.3	0.01	0.026
6.26803e-06	-85.6598	0.05	0.0500426	1.01253e-09	1570	83.3	0.01	0.028
5.7899e-06	-81.7332	0.05	0.0500409	1.01014e-09	1570	83.3	0.01	0.03
4.32299e-06	-81.8194	0.05	0.0500338	1.02835e-09	1570	83.3	0.01	0.032
3.23005e-06	-74.3529	0.05	0.0500392	1.01965e-09	1570	83.3	0.01	0.034
1.22259e-06	-96.8193	0.05	0.0500433	1.11908e-09	1570	83.3	0.01	0.036
1.48262e-06	101.015	0.05	0.0500425	1.0194e-09	1570	83.3	0.01	0.038
3.36751e-06	98.2083	0.05	0.0500446	1.04303e-09	1570	83.3	0.01	0.04
6.16474e-06	94.0983	0.05	0.0500457	1.03517e-09	1570	83.3	0.01	0.042
5.66378e-06	102.336	0.05	0.0500461	1.05954e-09	1570	83.3	0.01	0.044
3.38196e-06	108.145	0.05	0.0500413	1.05363e-09	1570	83.3	0.01	0.046
5.03459e-06	92.2437	0.05	0.0500433	1.08084e-09	1570	83.3	0.01	0.048
1.02797e-05	101.672	0.05	0.0500495	1.06903e-09	1570	83.3	0.01	0.05
1.25749e-05	100.496	0.05	0.0500379	1.02073e-09	1570	83.3	0.01	0.052
1.28117e-05	101.286	0.05	0.0500472	1.06961e-09	1570	83.3	0.01	0.054
1.19791e-05	101.709	0.05	0.0500436	1.0361e-09	1570	83.3	0.01	0.056
1.19324e-05	100.218	0.05	0.0500517	1.06298e-09	1570	83.3	0.01	0.058
1.07564e-05	97.1617	0.05	0.0500458	1.01716e-09	1570	83.3	0.01	0.06
5.54253e-06	102.18	0.05	0.0500403	1.01927e-09	1570	83.3	0.01	0.062
6.54777e-06	99.6037	0.05	0.0500389	1.04817e-09	1570	83.3	0.01	0.064
5.65024e-06	100.661	0.05	0.0500437	9.95211e-10	1570	83.3	0.01	0.066
7.22797e-06	98.9801	0.05	0.0500425	9.45183e-10	1570	83.3	0.01	0.068
6.34369e-06	99.9118	0.05	0.0500464	1.00402e-09	1570	83.3	0.01	0.07
3.7745e-06	85.8175	0.05	0.0500436	9.52955e-10	1570	83.3	0.01	0.072
1.57913e-06	67.6738	0.05	0.0500478	9.42858e-10	1570	83.3	0.01	0.074
4.98382e-06	99.791	0.05	0.0500465	9.47909e-10	1570	83.3	0.01	0.076
4.45821e-06	104.087	0.05	0.0500397	9.70773e-10	1570	83.3	0.01	0.078
1.99892e-06	106.946	0.05	0.0500424	9.63601e-10	1570	83.3	0.01	0.08
2.03873e-06	-87.1389	0.05	0.0500471	9.87538e-10	1570	83.3	0.01	0.082
6.26457e-06	-80.0743	0.05	0.0500418	9.63108e-10	1570	83.3	0.01	0.084
1.08844e-05	-81.203	0.05	0.0500518	9.60434e-10	1570	83.3	0.01	0.086
1.20645e-05	-80.5788	0.05	0.0500511	1.03473e-09	1570	83.3	0.01	0.088
1.26927e-05	-78.7916	0.05	0.0500541	9.71627e-10	1570	83.3	0.01	0.09
1.24524e-05	-80.4849	0.05	0.0500502	1.08198e-09	1570	83.3	0.01	0.092
9.56121e-06	-84.1276	0.05	0.050047	1.06536e-09	1570	83.3	0.01	0.094
1.00969e-05	-78.4331	0.05	0.0500494	9.69883e-10	1570	83.3	0.01	0.096
1.068e-05	-80.7561	0.05	0.0500472	1.03658e-09	1570	83.3	0.01	0.098
1.03631e-05	-78.2959	0.05	0.0500412	1.01324e-09	1570	83.3	0.01	0.1
9.0766e-06	-79.3822	0.05	0.0500465	1.04005e-09	1570	83.3	0.01	0.102
7.58562e-06	-87.0146	0.05	0.0500413	1.0911e-09	1570	83.3	0.01	0.104
6.61101e-06	-79.1041	0.05	0.0500422	1.10254e-09	1570	83.3	0.01	0.106
5.02068e-06	-86.2734	0.05	0.0500413	1.06395e-09	1570	83.3	0.01	0.108
3.36851e-06	-81.8466	0.05	0.0500379	1.07338e-09	1570	83.3	0.01	0.11
1.9761e-06	-99.4687	0.05	0.0500342	1.07342e-09	1570	83.3	0.01	0.112
1.42126e-06	-92.4273	0.05	0.0500419	1.02212e-09	1570	83.3	0.01	0.114
4.13468e-07	77.5664	0.05	0.0500433	1.08913e-09	1570	83.3	0.01	0.116
3.97054e-06	105.13	0.05	0.0500423	1.00642e-09	1570	83.3	0.01	0.118
7.23307e-06	103.717	0.05	0.050048	1.00165e-09	1570	83.3	0.01	0.12
7.82661e-06	101.926	0.05	0.0500413	1.03127e-09	1570	83.3	0.01	0.122
8.90103e-06	101.978	0.05	0.0500462	1.07162e-09	1570	83.3	0.01	0.124
1.05888e-05	98.8815	0.05	0.0500466	1.09462e-09	1570	83.3	0.01	0.126
1.18898e-05	99.815	0.05	0.0500502	1.06361e-09	1570	83.3	0.01	0.128
1.21454e-05	100.178	0.05	0.0500486	1.07445e-09	1570	83.3	0.01	0.13
1.28841e-05	100.947	0.05	0.0500387	1.04021e-09	1570	83.3	0.01	0.132
1.29138e-05	102.308	0.05	0.0500452	1.02671e-09	1570	83.3	0.01	0.134
1.22131e-05	101.846	0.05	0.050041	9.81804e-10	1570	83.3	0.01	0.136
1.17593e-05	101.339	0.05	0.0500456	1.06374e-09	1570	83.3	0.01	0.138
8.72324e-06	100.78	0.05	0.0500444	9.75541e-10	1570	83.3	0.01	0.14
5.46389e-06	99.1657	0.05	0.0500395	9.57994e-10	1570	83.3	0.01	0.142
3.18336e-06	103.454	0.05	0.0500468	9.85384e-10	1570	83.3	0.01	0.144
2.84885e-06	111.671	0.05	0.0500387	1.0143e-09	1570	83.3	0.01	0.146
7.14864e-07	90.7684	0.05	0.0500335	1.03993e-09	1570	83.3	0.01	0.148
7.43898e-07	-65.9082	0.05	0.0500391	9.5793e-10	1570	83.3	0.01	0.15
1.84204e-06	-76.4868	0.05	0.0500487	9.95159e-10	1570	83.3	0.01	0.152
3.84441e-06	-91.381	0.05	0.0500417	9.86962e-10	1570	83.3	0.01	0.154
4.41692e-06	-84.4535	0.05	0.0500469	9.48632e-10	1570	83.3	0.01	0.156
5.12472e-06	-90.5658	0.05	0.0500507	1.0028e-09	1570	83.3	0.01	0.158
5.80027e-06	-83.5943	0.05	0.0500463	1.00816e-09	1570	83.3	0.01	0.16
6.10041e-06	-85.1964	0.05	0.0500546	9.54398e-10	1570	83.3	0.01	0.162
7.57541e-06	-85.837	0.05	0.0500447	9.92322e-10	1570	83.3	0.01	0.164
8.0554e-06	-80.4696	0.05	0.0500401	1.02459e-09	1570	83.3	0.01	0.166
8.04719e-06	-83.8647	0.05	0.0500523	1.02149e-09	1570	83.3	0.01	0.168
8.94085e-06	-81.4423	0.05	0.0500518	1.06002e-09	1570	83.3	0.01	0.17
8.37435e-06	-81.6149	0.05	0.0500481	9.80643e-10	1570	83.3	0.01	0.172
9.40247e-06	-78.9687	0.05	0.0500402	1.07206e-09	1570	83.3	0.01	0.174
1.03029e-05	-83.5875	0.05	0.050054	9.94527e-10	1570	83.3	0.01	0.176
9.32725e-06	-75.5093	0.05	0.0500526	1.06396e-09	1570	83.3	0.01	0.178
7.05964e-06	-81.3958	0.05	0.0500472	1.09998e-09	1570	83.3	0.01	0.18
7.01302e-06	-82.6317	0.05	0.0500479	1.10979e-09	1570	83.3	0.01	0.182
5.12856e-06	-77.5175	0.05	0.0500381	1.08566e-09	1570	83.3	0.01	0.184
3.47397e-06	-85.4428	0.05	0.0500406	1.0439e-09	1570	83.3	0.01	0.186
1.43903e-06	-113.965	0.05	0.0500448	1.10413e-09	1570	83.3	0.01	0.188
1.25938e-06	72.3902	0.05	0.050039	1.09318e-09	1570	83.3	0.01	0.19
3.08929e-06	100.434	0.05	0.0500384	1.09324e-09	1570	83.3	0.01	0.192
5.92953e-06	92.9592	0.05	0.0500413	1.10362e-09	1570	83.3	0.01	0.194
4.89535e-06	94.7013	0.05	0.0500428	1.01431e-09	1570	83.3	0.01	0.196
5.49949e-06	97.9916	0.05	0.0500438	1.08338e-09	1570	83.3	0.01	0.198
6.67736e-06	96.8311	0.05	0.0500374	9.92731e-10	1570	83.3	0.01	0.2
8.32736e-06	101.402	0.05	0.0500459	1.0889e-09	1570	83.3	0.01	0.202
8.34442e-06	99.3402	0.05	0.0500494	1.05559e-09	1570	83.3	0.01	0.204
8.88931e-06	104.658	0.05	0.0500553	9.98441e-10	1570	83.3	0.01	0.206
9.26435e-06	102.301	0.05	0.0500537	1.03134e-09	1570	83.3	0.01	0.208
8.9694e-06	101.231	0.05	0.0500382	1.02017e-09	1570	83.3	0.01	0.21
9.29326e-06	101.887	0.05	0.0500466	1.03143e-09	1570	83.3	0.01	0.212
7.84223e-06	101.397	0.05	0.0500474	9.74532e-10	1570	83.3	0.01	0.214
1.26062e-05	101.017	0.05	0.0500447	1.00741e-09	1570	83.3	0.01	0.216
1.5123e-05	99.1746	0.05	0.0500397	1.06007e-09	1570	83.3	0.01	0.218
1.43699e-05	99.3265	0.05	0.0500375	1.03533e-09	1570	83.3	0.01	0.22
1.28231e-05	96.7905	0.05	0.0500485	1.02424e-09	1570	83.3	0.01	0.222
8.97726e-06	94.2119	0.05	0.050038	9.99689e-10	1570	83.3	0.01	0.224
3.19928e-06	93.5433	0.05	0.0500496	9.80957e-10	1570	83.3	0.01	0.226
5.48523e-06	97.8597	0.05	0.0500432	9.96824e-10	1570	83.3	0.01	0.228
6.26407e-06	99.289	0.05	0.0500448	1.03697e-09	1570	83.3	0.01	0.23
4.7137e-06	97.4044	0.05	0.05004	9.63958e-10	1570	83.3	0.01	0.232
2.4936e-06	-61.6473	0.05	0.0500426	1.05057e-09	1570	83.3	0.01	0.234
7.07836e-06	-84.3547	0.05	0.0500497	1.05435e-09	1570	83.3	0.01	0.236
8.82295e-06	-82.9839	0.05	0.0500454	1.0306e-09	1570	83.3	0.01	0.238
9.03135e-06	-78.2454	0.05	0.0500432	9.78398e-10	1570	83.3	0.01	0.24
1.14861e-05	-81.3817	0.05	0.0500526	1.0637e-09	1570	83.3	0.01	0.242
1.14157e-05	-79.3182	0.05	0.0500387	9.98672e-10	1570	83.3	0.01	0.244
7.40886e-06	-79.3601	0.05	0.0500292	9.90284e-10	1570	83.3	0.01	0.246
8.17803e-06	-79.0468	0.05	0.05004	1.04945e-09	1570	83.3	0.01	0.248
8.18163e-06	-78.4617	0.05	0.05004	1.01146e-09	1570	83.3	0.01	0.25
9.26618e-06	-78.7992	0.05	0.0500396	1.06419e-09	1570	83.3	0.01	0.252
1.15172e-05	-79.4384	0.05	0.0500435	1.09097e-09	1570	83.3	0.01	0.254
9.71984e-06	-77.5678	0.05	0.0500513	1.10696e-09	1570	83.3	0.01	0.256
9.87627e-06	-78.4882	0.05	0.0500457	1.06976e-09	1570	83.3	0.01	0.258
8.3737e-06	-81.2284	0.05	0.0500422	1.12206e-09	1570	83.3	0.01	0.26
6.85515e-06	-86.5608	0.05	0.0500429	1.02903e-09	1570	83.3	0.01	0.262
5.86743e-06	-76.7595	0.05	0.0500417	1.03328e-09	1570	83.3	0.01	0.264
4.03657e-06	-75.5399	0.05	0.0500447	1.02828e-09	1570	83.3	0.01	0.266
8.97077e-07	-76.7509	0.05	0.050039	1.09029e-09	1570	83.3	0.01	0.268
2.14687e-06	96.9147	0.05	0.0500308	1.10944e-09	1570	83.3	0.01	0.27
4.87668e-06	101.72	0.05	0.0500476	1.08833e-09	1570	83.3	0.01	0.272
6.87409e-06	101.857	0.05	0.0500376	1.00887e-09	1570	83.3	0.01	0.274
8.45343e-06	96.4416	0.05	0.0500417	1.09385e-09	1570	83.3	0.01	0.276
8.94951e-06	102.706	0.05	0.0500458	9.98211e-10	1570	83.3	0.01	0.278
1.02157e-05	102.722	0.05	0.0500455	1.01482e-09	1570	83.3	0.01	0.28
1.06997e-05	100.408	0.05	0.0500467	1.03085e-09	1570	83.3	0.01	0.282
1.35247e-05	102.152	0.05	0.0500401	1.01475e-09	1570	83.3	0.01	0.284
1.33e-05	103.563	0.05	0.0500409	1.09423e-09	1570	83.3	0.01	0.286
1.24639e-05	101.841	0.05	0.050031	9.95668e-10	1570	83.3	0.01	0.288
1.34436e-05	98.9414	0.05	0.0500427	1.03778e-09	1570	83.3	0.01	0.29
8.00543e-06	95.3367	0.05	0.050035	9.74762e-10	1570	83.3	0.01	0.292
7.24386e-06	93.5522	0.05	0.0500394	1.04741e-09	1570	83.3	0.01	0.294
6.34659e-06	94.7478	0.05	0.0500394	1.02428e-09	1570	83.3	0.01	0.296
4.77671e-06	91.6333	0.05	0.0500395	9.53718e-10	1570	83.3	0.01	0.298
4.08837e-06	106.336	0.05	0.0500301	9.59587e-10	1570	83.3	0.01	0.3
8.15177e-06	95.2487	0.05	0.0500416	9.95914e-10	1570	83.3	0.01	0.302
7.17015e-06	92.2156	0.05	0.0500439	1.00617e-09	1570	83.3	0.01	0.304
3.98816e-06	106.69	0.05	0.0500327	1.01839e-09	1570	83.3	0.01	0.306
1.76335e-06	73.0801	0.05	0.050041	9.34867e-10	1570	83.3	0.01	0.308
1.9528e-06	-78.0497	0.05	0.0500348	9.44698e-10	1570	83.3	0.01	0.31
4.91149e-06	-82.2729	0.05	0.0500358	9.47841e-10	1570	83.3	0.01	0.312
3.02598e-06	-87.6731	0.05	0.0500429	1.04384e-09	1570	83.3	0.01	0.314
2.51086e-06	-79.2555	0.05	0.0500415	1.04176e-09	1570	83.3	0.01	0.316
3.01465e-06	-81.6213	0.05	0.0500363	1.0426e-09	1570	83.3	0.01	0.318
4.8694e-06	-82.1635	0.05	0.050038	9.5338e-10	1570	83.3	0.01	0.32
5.08229e-06	-77.4264	0.05	0.0500437	9.59202e-10	1570	83.3	0.01	0.322
6.34317e-06	-80.4771	0.05	0.0500421	9.74504e-10	1570	83.3	0.01	0.324
1.11457e-05	-77.2092	0.05	0.0500403	9.74707e-10	1570	83.3	0.01	0.326
1.10909e-05	-80.7501	0.05	0.0500419	1.01831e-09	1570	83.3	0.01	0.328
9.4797e-06	-84.0445	0.05	0.0500396	1.07068e-09	1570	83.3	0.01	0.33
1.04135e-05	-79.5658	0.05	0.050045	1.06545e-09	1570	83.3	0.01	0.332
9.64639e-06	-80.5939	0.05	0.0500407	1.02269e-09	1570	83.3	0.01	0.334
8.10738e-06	-84.5696	0.05	0.0500437	1.07554e-09	1570	83.3	0.01	0.336
7.7429e-06	-82.0572	0.05	0.050043	1.08067e-09	1570	83.3	0.01	0.338
7.15796e-06	-78.4289	0.05	0.0500408	1.00656e-09	1570	83.3	0.01	0.34
5.53754e-06	-83.0422	0.05	0.0500402	1.06021e-09	1570	83.3	0.01	0.342
4.13824e-06	-93.2057	0.05	0.0500306	1.01161e-09	1570	83.3	0.01	0.344
3.15072e-06	-96.2635	0.05	0.0500361	1.06753e-09	1570	83.3	0.01	0.346
9.50446e-07	-70.669	0.05	0.0500441	1.02403e-09	1570	83.3	0.01	0.348
7.67565e-07	40.1522	0.05	0.0500394	1.00979e-09	1570	83.3	0.01	0.35
1.98425e-06	89.4017	0.05	0.0500432	1.02277e-09	1570	83.3	0.01	0.352
4.51543e-06	101.613	0.05	0.0500426	9.93546e-10	1570	83.3	0.01	0.354
4.49382e-06	106.576	0.05	0.0500415	1.00851e-09	1570	83.3	0.01	0.356
3.75329e-06	102.747	0.05	0.0500359	1.00945e-09	1570	83.3	0.01	0.358
4.96252e-06	93.058	0.05	0.0500401	1.01041e-09	1570	83.3	0.01	0.36
7.34888e-06	95.7482	0.05	0.0500408	1.04073e-09	1570	83.3	0.01	0.362
1.00386e-05	99.291	0.05	0.0500397	1.02671e-09	1570	83.3	0.01	0.364
1.05796e-05	98.6919	0.05	0.0500346	1.06302e-09	1570	83.3	0.01	0.366
1.13897e-05	96.3744	0.05	0.0500388	1.01035e-09	1570	83.3	0.01	0.368
1.26081e-05	102.867	0.05	0.0500271	9.79308e-10	1570	83.3	0.01	0.37
1.14288e-05	104.133	0.05	0.0500442	1.00962e-09	1570	83.3	0.01	0.372
7.18134e-06	97.7528	0.05	0.0500461	1.01376e-09	1570	83.3	0.01	0.374
6.58053e-06	96.7639	0.05	0.0500444	9.74321e-10	1570	83.3	0.01	0.376
6.30533e-06	99.0317	0.05	0.0500385	9.93653e-10	1570	83.3	0.01	0.378
7.29845e-06	99.7793	0.05	0.0500432	1.0046e-09	1570	83.3	0.01	0.38
6.22602e-06	97.7077	0.05	0.0500426	9.69708e-10	1570	83.3	0.01	0.382
2.34455e-06	90.676	0.05	0.0500392	9.91364e-10	1570	83.3	0.01	0.384
2.41743e-06	89.6578	0.05	0.0500428	9.92032e-10	1570	83.3	0.01	0.386
5.96074e-07	127.035	0.05	0.0500432	1.0325e-09	1570	83.3	0.01	0.388
8.33508e-07	-22.3271	0.05	0.0500342	1.05036e-09	1570	83.3	0.01	0.39
3.38273e-06	-80.4785	0.05	0.0500388	9.40688e-10	1570	83.3	0.01	0.392
5.24219e-06	-77.6274	0.05	0.0500398	9.50801e-10	1570	83.3	0.01	0.394
4.82939e-06	-82.6998	0.05	0.0500414	1.02729e-09	1570	83.3	0.01	0.396
4.70782e-06	-80.5841	0.05	0.0500386	9.55216e-10	1570	83.3	0.01	0.398
7.65345e-06	-77.0892	0.05	0.050043	9.77421e-10	1570	83.3	0.01	0.4
