# Supplementary material for: Integrated photodetectors for compact Fourier-transform waveguide spectrometers
Source: Nat Photonics. 2022 Oct 24;17(1):59–64. doi: 10.1038/s41566-022-01088-7 (PMC9822831; doi:10.1038/s41566-022-01088-7)
Supplement: Source Data Fig. 3 — Unprocessed measurement data and waveguide spectrometer with one light source. [file 41566_2022_1088_MOESM2_ESM.xlsx]

## Sheet: fig3b
Frequency [Hz]	Vsd set [V]	Vsd Sample [V]	Isd [A]	Laser WL [nm]	Laser I [mA]
0	0	5.92868e-06	5.8496e-11	1570	2
0	0.005	0.005	2.19087e-10	1570	2
0	0.01	0.01001	2.81926e-10	1570	2
0	0.015	0.015	4.53711e-10	1570	2
0	0.02	0.02001	6.27943e-10	1570	2
0	0.025	0.025	7.37576e-10	1570	2
0	0.03	0.03	9.42624e-10	1570	2
0	0.035	0.03501	1.05447e-09	1570	2
0	0.04	0.04002	1.27511e-09	1570	2
0	0.045	0.04501	1.34956e-09	1570	2
0	0.05	0.05002	1.61204e-09	1570	2
0	0.055	0.05502	1.66163e-09	1570	2
0	0.06	0.06001	1.82405e-09	1570	2
0	0.065	0.06501	2.05976e-09	1570	2
0	0.07	0.07001	2.2462e-09	1570	2
0	0.075	0.07501	2.383e-09	1570	2
0	0.08	0.08001	2.54065e-09	1570	2
0	0.085	0.08502	2.71934e-09	1570	2
0	0.09	0.09002	2.7741e-09	1570	2
0	0.095	0.09502	2.98837e-09	1570	2
0	0.1	0.10002	3.16364e-09	1570	2
0	0.105	0.10502	3.37523e-09	1570	2
0	0.11	0.11001	3.55628e-09	1570	2
0	0.115	0.11503	3.68447e-09	1570	2
0	0.12	0.12003	3.78571e-09	1570	2
0	0.125	0.12502	3.98275e-09	1570	2
0	0.13	0.13002	4.22723e-09	1570	2
0	0.135	0.13501	4.34275e-09	1570	2
0	0.14	0.14002	4.51455e-09	1570	2
0	0.145	0.14501	4.68832e-09	1570	2
0	0.15	0.15001	4.86664e-09	1570	2
0	0.155	0.15502	5.05453e-09	1570	2
0	0.16	0.16002	5.29253e-09	1570	2
0	0.165	0.16501	5.44749e-09	1570	2
0	0.17	0.17001	5.51554e-09	1570	2
0	0.175	0.17501	5.8382e-09	1570	2
0	0.18	0.18001	5.94964e-09	1570	2
0	0.185	0.18501	6.21091e-09	1570	2
0	0.19	0.19001	6.44038e-09	1570	2
0	0.195	0.19501	6.50783e-09	1570	2
0	0.2	0.20001	6.71808e-09	1570	2
0	0.195	0.19501	6.60672e-09	1570	2
0	0.19	0.19001	6.53211e-09	1570	2
0	0.185	0.18501	6.29421e-09	1570	2
0	0.18	0.18001	6.15176e-09	1570	2
0	0.175	0.17501	5.82617e-09	1570	2
0	0.17	0.17002	5.74419e-09	1570	2
0	0.165	0.16501	5.64689e-09	1570	2
0	0.16	0.16001	5.43211e-09	1570	2
0	0.155	0.15501	5.13945e-09	1570	2
0	0.15	0.15001	4.99084e-09	1570	2
0	0.145	0.14502	4.75889e-09	1570	2
0	0.14	0.14002	4.55369e-09	1570	2
0	0.135	0.13502	4.53125e-09	1570	2
0	0.13	0.13002	4.21232e-09	1570	2
0	0.125	0.12502	4.01446e-09	1570	2
0	0.12	0.12002	4.01779e-09	1570	2
0	0.115	0.11503	3.77847e-09	1570	2
0	0.11	0.11003	3.50647e-09	1570	2
0	0.105	0.10502	3.43483e-09	1570	2
0	0.1	0.10003	3.20274e-09	1570	2
0	0.095	0.09502	3.10609e-09	1570	2
0	0.09	0.09002	2.93817e-09	1570	2
0	0.085	0.08502	2.75476e-09	1570	2
0	0.08	0.08002	2.57064e-09	1570	2
0	0.075	0.07501	2.41935e-09	1570	2
0	0.07	0.07001	2.25389e-09	1570	2
0	0.065	0.06501	2.0657e-09	1570	2
0	0.06	0.06001	1.86406e-09	1570	2
0	0.055	0.05501	1.69706e-09	1570	2
0	0.05	0.05001	1.6116e-09	1570	2
0	0.045	0.04501	1.46232e-09	1570	2
0	0.04	0.04001	1.19981e-09	1570	2
0	0.035	0.03501	1.16169e-09	1570	2
0	0.03	0.03001	9.99574e-10	1570	2
0	0.025	0.02501	7.48726e-10	1570	2
0	0.02	0.02002	6.70862e-10	1570	2
0	0.015	0.01501	4.86747e-10	1570	2
0	0.01	0.01001	3.6186e-10	1570	2
0	0.005	0.00501	1.13324e-10	1570	2
0	0	9.64006e-06	1.3117e-11	1570	2
0	-0.005	-0.00494	-1.53156e-10	1570	2
0	-0.01	-0.00994	-3.14307e-10	1570	2
0	-0.015	-0.01495	-4.45386e-10	1570	2
0	-0.02	-0.01995	-5.47318e-10	1570	2
0	-0.025	-0.02495	-7.17195e-10	1570	2
0	-0.03	-0.02995	-9.3044e-10	1570	2
0	-0.035	-0.03495	-1.01223e-09	1570	2
0	-0.04	-0.03995	-1.12834e-09	1570	2
0	-0.045	-0.04496	-1.35669e-09	1570	2
0	-0.05	-0.04995	-1.42221e-09	1570	2
0	-0.055	-0.05496	-1.56363e-09	1570	2
0	-0.06	-0.05995	-1.70712e-09	1570	2
0	-0.065	-0.06495	-1.84569e-09	1570	2
0	-0.07	-0.06996	-2.02181e-09	1570	2
0	-0.075	-0.07495	-2.21139e-09	1570	2
0	-0.08	-0.07995	-2.37663e-09	1570	2
0	-0.085	-0.08494	-2.46358e-09	1570	2
0	-0.09	-0.08995	-2.61222e-09	1570	2
0	-0.095	-0.09495	-2.82109e-09	1570	2
0	-0.1	-0.09995	-2.91479e-09	1570	2
0	-0.105	-0.10496	-3.08399e-09	1570	2
0	-0.11	-0.10996	-3.07946e-09	1570	2
0	-0.115	-0.11496	-3.41739e-09	1570	2
0	-0.12	-0.11995	-3.51385e-09	1570	2
0	-0.125	-0.12495	-3.68045e-09	1570	2
0	-0.13	-0.12996	-3.69119e-09	1570	2
0	-0.135	-0.13495	-3.86316e-09	1570	2
0	-0.14	-0.13995	-4.09675e-09	1570	2
0	-0.145	-0.14495	-4.11575e-09	1570	2
0	-0.15	-0.14995	-4.3168e-09	1570	2
0	-0.155	-0.15495	-4.51691e-09	1570	2
0	-0.16	-0.15994	-4.65606e-09	1570	2
0	-0.165	-0.16495	-4.67083e-09	1570	2
0	-0.17	-0.16994	-4.947e-09	1570	2
0	-0.175	-0.17494	-5.10774e-09	1570	2
0	-0.18	-0.17994	-5.25167e-09	1570	2
0	-0.185	-0.18494	-5.3632e-09	1570	2
0	-0.19	-0.18994	-5.58233e-09	1570	2
0	-0.195	-0.19494	-5.6409e-09	1570	2
0	-0.2	-0.19994	-5.86931e-09	1570	2
0	-0.195	-0.19494	-5.56703e-09	1570	2
0	-0.19	-0.18994	-5.54459e-09	1570	2
0	-0.185	-0.18494	-5.32566e-09	1570	2
0	-0.18	-0.17995	-5.25871e-09	1570	2
0	-0.175	-0.17495	-5.0565e-09	1570	2
0	-0.17	-0.16995	-4.97955e-09	1570	2
0	-0.165	-0.16495	-4.78098e-09	1570	2
0	-0.16	-0.15994	-4.6521e-09	1570	2
0	-0.155	-0.15495	-4.51368e-09	1570	2
0	-0.15	-0.14995	-4.40139e-09	1570	2
0	-0.145	-0.14495	-4.26515e-09	1570	2
0	-0.14	-0.13996	-4.09593e-09	1570	2
0	-0.135	-0.13495	-3.98076e-09	1570	2
0	-0.13	-0.12995	-3.84057e-09	1570	2
0	-0.125	-0.12495	-3.67462e-09	1570	2
0	-0.12	-0.11995	-3.44101e-09	1570	2
0	-0.115	-0.11495	-3.29802e-09	1570	2
0	-0.11	-0.10995	-3.13156e-09	1570	2
0	-0.105	-0.10495	-2.98401e-09	1570	2
0	-0.1	-0.09995	-2.96553e-09	1570	2
0	-0.095	-0.09495	-2.70256e-09	1570	2
0	-0.09	-0.08996	-2.59279e-09	1570	2
0	-0.085	-0.08496	-2.50804e-09	1570	2
0	-0.08	-0.07994	-2.29068e-09	1570	2
0	-0.075	-0.07495	-2.21803e-09	1570	2
0	-0.07	-0.06995	-1.99571e-09	1570	2
0	-0.065	-0.06495	-1.97702e-09	1570	2
0	-0.06	-0.05996	-1.7964e-09	1570	2
0	-0.055	-0.05495	-1.60893e-09	1570	2
0	-0.05	-0.04995	-1.53884e-09	1570	2
0	-0.045	-0.04495	-1.37306e-09	1570	2
0	-0.04	-0.03994	-1.21964e-09	1570	2
0	-0.035	-0.03494	-9.79237e-10	1570	2
0	-0.03	-0.02995	-8.94054e-10	1570	2
0	-0.025	-0.02495	-7.74876e-10	1570	2
0	-0.02	-0.01994	-5.36879e-10	1570	2
0	-0.015	-0.01494	-4.10787e-10	1570	2
0	-0.01	-0.00995	-2.49743e-10	1570	2
0	-0.005	-0.00495	-1.04837e-10	1570	2
0	0	2.16246e-05	-4.45445e-12	1570	2
0	0	1.49647e-05	-3.70781e-11	1570	83.1
0	0.005	0.00501	1.71093e-10	1570	83.1
0	0.01	0.01002	3.93009e-10	1570	83.1
0	0.015	0.01501	4.69911e-10	1570	83.1
0	0.02	0.02002	6.91064e-10	1570	83.1
0	0.025	0.02501	8.60957e-10	1570	83.1
0	0.03	0.03002	1.06732e-09	1570	83.1
0	0.035	0.03502	1.20097e-09	1570	83.1
0	0.04	0.04002	1.49172e-09	1570	83.1
0	0.045	0.045	1.57405e-09	1570	83.1
0	0.05	0.05001	1.72408e-09	1570	83.1
0	0.055	0.05501	1.98713e-09	1570	83.1
0	0.06	0.06001	2.11613e-09	1570	83.1
0	0.065	0.06502	2.44491e-09	1570	83.1
0	0.07	0.07002	2.55277e-09	1570	83.1
0	0.075	0.07502	2.67447e-09	1570	83.1
0	0.08	0.08001	2.92799e-09	1570	83.1
0	0.085	0.08501	3.0086e-09	1570	83.1
0	0.09	0.09001	3.28695e-09	1570	83.1
0	0.095	0.09502	3.54344e-09	1570	83.1
0	0.1	0.10002	3.6958e-09	1570	83.1
0	0.105	0.10502	3.80753e-09	1570	83.1
0	0.11	0.11001	4.14853e-09	1570	83.1
0	0.115	0.11502	4.38728e-09	1570	83.1
0	0.12	0.12003	4.47929e-09	1570	83.1
0	0.125	0.12503	4.75609e-09	1570	83.1
0	0.13	0.13002	4.9628e-09	1570	83.1
0	0.135	0.13502	5.11995e-09	1570	83.1
0	0.14	0.14002	5.38485e-09	1570	83.1
0	0.145	0.14502	5.63118e-09	1570	83.1
0	0.15	0.15001	5.6956e-09	1570	83.1
0	0.155	0.15502	5.94738e-09	1570	83.1
0	0.16	0.16002	6.11236e-09	1570	83.1
0	0.165	0.16501	6.2562e-09	1570	83.1
0	0.17	0.17001	6.62183e-09	1570	83.1
0	0.175	0.17501	6.78935e-09	1570	83.1
0	0.18	0.18001	7.10326e-09	1570	83.1
0	0.185	0.18501	7.37856e-09	1570	83.1
0	0.19	0.19002	7.53063e-09	1570	83.1
0	0.195	0.19502	7.74315e-09	1570	83.1
0	0.2	0.20002	7.98662e-09	1570	83.1
0	0.195	0.19502	7.73943e-09	1570	83.1
0	0.19	0.19001	7.5609e-09	1570	83.1
0	0.185	0.18501	7.33227e-09	1570	83.1
0	0.18	0.18002	7.12679e-09	1570	83.1
0	0.175	0.17502	7.0288e-09	1570	83.1
0	0.17	0.17002	6.75861e-09	1570	83.1
0	0.165	0.16502	6.60899e-09	1570	83.1
0	0.16	0.16002	6.33507e-09	1570	83.1
0	0.155	0.15502	6.20391e-09	1570	83.1
0	0.15	0.15003	5.87674e-09	1570	83.1
0	0.145	0.14503	5.8391e-09	1570	83.1
0	0.14	0.14002	5.47718e-09	1570	83.1
0	0.135	0.13502	5.43448e-09	1570	83.1
0	0.13	0.13002	5.15052e-09	1570	83.1
0	0.125	0.12502	4.98391e-09	1570	83.1
0	0.12	0.12002	4.76671e-09	1570	83.1
0	0.115	0.11502	4.41569e-09	1570	83.1
0	0.11	0.11002	4.26327e-09	1570	83.1
0	0.105	0.10503	4.15476e-09	1570	83.1
0	0.1	0.10002	3.96289e-09	1570	83.1
0	0.095	0.09503	3.81357e-09	1570	83.1
0	0.09	0.09002	3.4981e-09	1570	83.1
0	0.085	0.08501	3.26585e-09	1570	83.1
0	0.08	0.08001	3.07644e-09	1570	83.1
0	0.075	0.07501	2.8821e-09	1570	83.1
0	0.07	0.07001	2.81457e-09	1570	83.1
0	0.065	0.06502	2.62039e-09	1570	83.1
0	0.06	0.06003	2.29427e-09	1570	83.1
0	0.055	0.05501	2.20506e-09	1570	83.1
0	0.05	0.05001	2.00395e-09	1570	83.1
0	0.045	0.04501	1.78175e-09	1570	83.1
0	0.04	0.04001	1.49756e-09	1570	83.1
0	0.035	0.03501	1.40203e-09	1570	83.1
0	0.03	0.03001	1.12152e-09	1570	83.1
0	0.025	0.02501	1.00525e-09	1570	83.1
0	0.02	0.02001	7.40198e-10	1570	83.1
0	0.015	0.015	6.32e-10	1570	83.1
0	0.01	0.01001	4.25295e-10	1570	83.1
0	0.005	0.00501	2.59054e-10	1570	83.1
0	0	8.64665e-06	1.43449e-11	1570	83.1
0	-0.005	-0.00494	-1.41513e-10	1570	83.1
0	-0.01	-0.00995	-3.22568e-10	1570	83.1
0	-0.015	-0.01494	-5.12083e-10	1570	83.1
0	-0.02	-0.01995	-7.18335e-10	1570	83.1
0	-0.025	-0.02495	-9.27941e-10	1570	83.1
0	-0.03	-0.02995	-1.17702e-09	1570	83.1
0	-0.035	-0.03494	-1.27898e-09	1570	83.1
0	-0.04	-0.03996	-1.54128e-09	1570	83.1
0	-0.045	-0.04495	-1.63325e-09	1570	83.1
0	-0.05	-0.04995	-1.91931e-09	1570	83.1
0	-0.055	-0.05496	-2.05498e-09	1570	83.1
0	-0.06	-0.05995	-2.369e-09	1570	83.1
0	-0.065	-0.06496	-2.49561e-09	1570	83.1
0	-0.07	-0.06995	-2.74241e-09	1570	83.1
0	-0.075	-0.07495	-2.9405e-09	1570	83.1
0	-0.08	-0.07995	-3.07566e-09	1570	83.1
0	-0.085	-0.08496	-3.18151e-09	1570	83.1
0	-0.09	-0.08995	-3.37652e-09	1570	83.1
0	-0.095	-0.09495	-3.59891e-09	1570	83.1
0	-0.1	-0.09996	-3.88554e-09	1570	83.1
0	-0.105	-0.10495	-4.08709e-09	1570	83.1
0	-0.11	-0.10995	-4.30402e-09	1570	83.1
0	-0.115	-0.11495	-4.29727e-09	1570	83.1
0	-0.12	-0.11994	-4.67354e-09	1570	83.1
0	-0.125	-0.12494	-4.87271e-09	1570	83.1
0	-0.13	-0.12995	-4.91728e-09	1570	83.1
0	-0.135	-0.13496	-5.17006e-09	1570	83.1
0	-0.14	-0.13996	-5.31509e-09	1570	83.1
0	-0.145	-0.14495	-5.56065e-09	1570	83.1
0	-0.15	-0.14995	-5.86845e-09	1570	83.1
0	-0.155	-0.15495	-5.9529e-09	1570	83.1
0	-0.16	-0.15994	-5.96713e-09	1570	83.1
0	-0.165	-0.16495	-6.19566e-09	1570	83.1
0	-0.17	-0.16995	-6.53134e-09	1570	83.1
0	-0.175	-0.17494	-6.6096e-09	1570	83.1
0	-0.18	-0.17995	-6.79739e-09	1570	83.1
0	-0.185	-0.18494	-7.01746e-09	1570	83.1
0	-0.19	-0.18994	-7.19764e-09	1570	83.1
0	-0.195	-0.19494	-7.3707e-09	1570	83.1
0	-0.2	-0.19994	-7.52776e-09	1570	83.1
0	-0.195	-0.19495	-7.47757e-09	1570	83.1
0	-0.19	-0.18995	-7.16314e-09	1570	83.1
0	-0.185	-0.18494	-7.05424e-09	1570	83.1
0	-0.18	-0.17995	-6.77522e-09	1570	83.1
0	-0.175	-0.17495	-6.74208e-09	1570	83.1
0	-0.17	-0.16995	-6.40173e-09	1570	83.1
0	-0.165	-0.16495	-6.22871e-09	1570	83.1
0	-0.16	-0.15994	-6.19729e-09	1570	83.1
0	-0.155	-0.15496	-5.84015e-09	1570	83.1
0	-0.15	-0.14995	-5.77803e-09	1570	83.1
0	-0.145	-0.14495	-5.5897e-09	1570	83.1
0	-0.14	-0.13996	-5.37647e-09	1570	83.1
0	-0.135	-0.13495	-5.24458e-09	1570	83.1
0	-0.13	-0.12995	-4.95726e-09	1570	83.1
0	-0.125	-0.12496	-4.8337e-09	1570	83.1
0	-0.12	-0.11995	-4.67863e-09	1570	83.1
0	-0.115	-0.11495	-4.5762e-09	1570	83.1
0	-0.11	-0.10995	-4.32021e-09	1570	83.1
0	-0.105	-0.10495	-4.20477e-09	1570	83.1
0	-0.1	-0.09996	-3.94289e-09	1570	83.1
0	-0.095	-0.09496	-3.60612e-09	1570	83.1
0	-0.09	-0.08995	-3.46413e-09	1570	83.1
0	-0.085	-0.08496	-3.32432e-09	1570	83.1
0	-0.08	-0.07996	-3.20939e-09	1569.9	83.1
0	-0.075	-0.07495	-2.93718e-09	1570	83.1
0	-0.07	-0.06996	-2.78224e-09	1570	83.1
0	-0.065	-0.06495	-2.52047e-09	1570	83.1
0	-0.06	-0.05995	-2.3057e-09	1570	83.1
0	-0.055	-0.05496	-2.23829e-09	1570	83.1
0	-0.05	-0.04996	-2.03915e-09	1570	83.1
0	-0.045	-0.04496	-1.82247e-09	1570	83.1
0	-0.04	-0.03996	-1.55924e-09	1570	83.1
0	-0.035	-0.03495	-1.42788e-09	1570	83.1
0	-0.03	-0.02995	-1.27405e-09	1570	83.1
0	-0.025	-0.02495	-9.97817e-10	1570	83.1
0	-0.02	-0.01995	-8.7165e-10	1570	83.1
0	-0.015	-0.01495	-6.28972e-10	1570	83.1
0	-0.01	-0.00995	-4.33675e-10	1570	83.1
0	-0.005	-0.00494	-2.47753e-10	1570	83.1
0	0	1.60694e-05	5.11289e-11	1570	83.1

## Sheet: fig3c-e
Laser: 1570nm, 83.1mA laser setting, 300 μW fiber output power
load resistance: 100kOhm
piezostage 1mV equals 10nm
Wavelength [nm]	Frequency [Hz]	Sample: R [V]	Sample: Th. [°]	piezostage set [V]	Vsd set [V]	piezostage Sample [V]	Vsd Sample [V]	Isd [A]	Laser WL [nm]	Laser I [mA]
1570	28	7.72917e-05	165.918	0	0.05	-0.000314713	0.0500032	3.19571e-09	1570	83.1
1570	27	7.79507e-05	166.292	0.005	0.05	0.00441154	0.0500096	3.3084e-09	1570	83.1
1570	27	7.54793e-05	165.488	0.01	0.05	0.00960429	0.0500018	3.2325e-09	1570	83.1
1570	27	7.48301e-05	166.173	0.015	0.05	0.0147549	0.0500056	3.27028e-09	1570	83.1
1570	27	7.66778e-05	165.999	0.02	0.05	0.0194502	0.0499937	3.2921e-09	1570	83.1
1570	27	8.14342e-05	166.279	0.025	0.05	0.0245078	0.0500049	3.1747e-09	1570	83.1
1570	27	8.6038e-05	166.405	0.03	0.05	0.0295997	0.0500068	3.33325e-09	1570	83.1
1570	27	9.29212e-05	166.894	0.035	0.05	0.0346692	0.0500028	3.21618e-09	1570	83.1
1570	27	9.46427e-05	166.872	0.04	0.05	0.0394615	0.0500016	3.26546e-09	1570	83.1
1570	27	9.74461e-05	167.656	0.045	0.05	0.0445247	0.0500036	3.23961e-09	1570	83.1
1570	27	0.000102853	167.114	0.05	0.05	0.0496364	0.049993	3.37348e-09	1570	83.1
1570	27	0.000103546	167.492	0.055	0.05	0.0544159	0.0500001	3.39579e-09	1570	83.1
1570	27	9.90245e-05	167.316	0.06	0.05	0.0594521	0.0500005	3.38059e-09	1570	83.1
1570	27	9.43318e-05	167.001	0.065	0.05	0.064648	0.0499931	3.3748e-09	1570	83.1
1570	27	8.95835e-05	166.697	0.07	0.05	0.0697287	0.0500063	3.15679e-09	1570	83.1
1570	27	8.38439e-05	166.416	0.075	0.05	0.0744128	0.0500037	3.25033e-09	1570	83.1
1570	28	7.81414e-05	166.078	0.08	0.05	0.0796572	0.0500086	3.10874e-09	1570	83.1
1570	27	7.36932e-05	165.96	0.085	0.05	0.0846934	0.0500085	3.25417e-09	1570	83.1
1570	27	7.07958e-05	166.207	0.09	0.05	0.0897002	0.0499967	3.21914e-09	1570	83.1
1570	27	7.26262e-05	166.257	0.095	0.05	0.0945123	0.0500075	3.19557e-09	1570	83.1
1570	27	7.61086e-05	166.572	0.1	0.05	0.099558	0.0500025	3.13389e-09	1570	83.1
1570	27	8.10231e-05	165.976	0.105	0.05	0.104702	0.0500109	3.26811e-09	1570	83.1
1570	27	8.55497e-05	167.232	0.11	0.05	0.109479	0.0500054	3.21853e-09	1570	83.1
1570	27	8.98903e-05	167.149	0.115	0.05	0.114523	0.0500057	3.24301e-09	1570	83.1
1570	27	9.65662e-05	167.299	0.12	0.05	0.119629	0.0500021	3.19974e-09	1570	83.1
1570	27	9.85975e-05	167.242	0.125	0.05	0.124759	0.0500053	3.32372e-09	1570	83.1
1570	27	0.000101729	167.335	0.13	0.05	0.129473	0.0500053	3.24069e-09	1570	83.1
1570	27	0.000101921	167.513	0.135	0.05	0.13457	0.0500112	3.30124e-09	1570	83.1
1570	27	9.76754e-05	167.122	0.14	0.05	0.139728	0.0499966	3.34073e-09	1570	83.1
1570	27	9.49038e-05	166.603	0.145	0.05	0.144726	0.0500056	3.14242e-09	1570	83.1
1570	27	8.92451e-05	166.281	0.15	0.05	0.149486	0.0500041	3.22945e-09	1570	83.1
1570	27	8.13151e-05	166.491	0.155	0.05	0.154579	0.0500042	3.3037e-09	1570	83.1
1570	27	7.57798e-05	166.864	0.16	0.05	0.159631	0.0500107	3.23891e-09	1570	83.1
1570	27	7.26921e-05	166.199	0.165	0.05	0.164464	0.0500021	3.10344e-09	1570	83.1
1570	27	7.31915e-05	165.419	0.17	0.05	0.169554	0.0500088	3.08275e-09	1570	83.1
1570	27	7.3305e-05	166.359	0.175	0.05	0.174591	0.0500074	3.23388e-09	1570	83.1
1570	27	7.65876e-05	166.072	0.18	0.05	0.1797	0.0499983	3.10889e-09	1570	83.1
1570	27	8.02327e-05	166.727	0.185	0.05	0.184422	0.0500016	3.13256e-09	1570	83.1
1570	27	8.63909e-05	166.966	0.19	0.05	0.189583	0.0500094	3.09699e-09	1570	83.1
1570	27	9.17183e-05	167.131	0.195	0.05	0.194669	0.0500098	3.2737e-09	1570	83.1
1570	27	9.58871e-05	167.479	0.2	0.05	0.19949	0.0500039	3.34454e-09	1570	83.1
1570	27	9.82746e-05	167.42	0.205	0.05	0.204506	0.0500171	3.21611e-09	1570	83.1
1570	27	9.5228e-05	166.676	0.21	0.05	0.209506	0.0500097	3.1936e-09	1569.9	83.1
1570	27	9.57002e-05	167.163	0.215	0.05	0.214585	0.050007	3.35354e-09	1570	83.1
1570	27	9.72993e-05	167.124	0.22	0.05	0.219414	0.0500042	3.36447e-09	1570	83.1
1570	27	9.39501e-05	167.313	0.225	0.05	0.224504	0.0500073	3.30039e-09	1570	83.1
1570	27	8.78291e-05	166.795	0.23	0.05	0.229588	0.0500041	3.30665e-09	1570	83.1
1570	27	7.91553e-05	166.391	0.235	0.05	0.234721	0.050006	3.10547e-09	1570	83.1
1570	27	7.64691e-05	166.373	0.24	0.05	0.239444	0.0500092	3.1345e-09	1570	83.1
1570	27	7.52921e-05	166.343	0.245	0.05	0.244639	0.0500052	3.0982e-09	1570	83.1
1570	27	7.22955e-05	166.389	0.25	0.05	0.249709	0.0500007	3.20654e-09	1570	83.1
1570	27	7.38062e-05	166.17	0.255	0.05	0.254501	0.0500016	3.11536e-09	1570	83.1
1570	27	7.68357e-05	166.431	0.26	0.05	0.259612	0.0499962	3.17268e-09	1570	83.1
1570	27	8.43388e-05	166.585	0.265	0.05	0.264694	0.0500081	3.26101e-09	1570	83.1
1570	27	8.77658e-05	166.76	0.27	0.05	0.269699	0.0500046	3.21377e-09	1570	83.1
1570	27	9.09658e-05	167.054	0.275	0.05	0.27446	0.0500029	3.28001e-09	1570	83.1
1570	27	9.42946e-05	166.614	0.28	0.05	0.279537	0.050014	3.34886e-09	1570	83.1
1570	27	9.52535e-05	166.981	0.285	0.05	0.28466	0.0500048	3.38949e-09	1570	83.1
1570	27	0.00010057	167.573	0.29	0.05	0.289714	0.0500109	3.31755e-09	1570	83.1
1570	27	0.000100803	166.989	0.295	0.05	0.294512	0.0500069	3.28033e-09	1570	83.1
1570	27	9.883e-05	167.15	0.3	0.05	0.299608	0.0500029	3.23305e-09	1570	83.1
1570	27	9.00384e-05	167.003	0.305	0.05	0.304718	0.0500039	3.15004e-09	1570	83.1
1570	27	8.23784e-05	166.965	0.31	0.05	0.30945	0.0500064	3.22646e-09	1570	83.1
1570	27	7.6923e-05	166.848	0.315	0.05	0.314532	0.0500036	3.14809e-09	1570	83.1
1570	27	7.43056e-05	166.281	0.32	0.05	0.319602	0.0500111	3.21424e-09	1570	83.1
1570	27	7.22292e-05	166.555	0.325	0.05	0.324664	0.0500055	3.19754e-09	1570	83.1
1570	27	7.17185e-05	166.55	0.33	0.05	0.329438	0.0500025	3.19848e-09	1570	83.1
1570	27	7.42823e-05	165.556	0.335	0.05	0.334423	0.0500126	3.14246e-09	1570	83.1
1570	27	7.76533e-05	166.163	0.34	0.05	0.339598	0.0500048	3.18404e-09	1570	83.1
1570	27	8.18956e-05	166.793	0.345	0.05	0.34434	0.0500041	3.2702e-09	1570	83.1
1570	27	8.83348e-05	166.504	0.35	0.05	0.349429	0.0500141	3.34173e-09	1570	83.1
1570	27	9.47089e-05	167.284	0.355	0.05	0.354548	0.0500121	3.31859e-09	1570	83.1
1570	27	9.8802e-05	167.936	0.36	0.05	0.3596	0.0500052	3.2198e-09	1570	83.1
1570	27	0.000100494	167.114	0.365	0.05	0.364464	0.0500067	3.35485e-09	1570	83.1
1570	27	0.000100191	167.249	0.37	0.05	0.369516	0.0500084	3.26702e-09	1570	83.1
1570	27	0.000101798	168.056	0.375	0.05	0.374565	0.0500044	3.19812e-09	1570	83.1
1570	27	9.75338e-05	167.546	0.38	0.05	0.379708	0.0500064	3.32627e-09	1570	83.1
1570	27	9.48109e-05	167.192	0.385	0.05	0.384443	0.0500065	3.20144e-09	1570	83.1
1570	27	8.82189e-05	166.537	0.39	0.05	0.38951	0.0500017	3.24256e-09	1570	83.1
1570	27	8.45642e-05	166.548	0.395	0.05	0.394637	0.050007	3.09743e-09	1570	83.1
1570	27	7.84741e-05	165.744	0.4	0.05	0.3994	0.0500003	3.17183e-09	1570	83.1
1570	27	7.35571e-05	166.068	0.405	0.05	0.404453	0.0500023	3.16099e-09	1570	83.1
1570	28	7.271e-05	165.432	0.41	0.05	0.409578	0.0499958	3.11708e-09	1570	83.1
1570	27	7.42325e-05	165.995	0.415	0.05	0.414666	0.0500061	3.24715e-09	1570	83.1
1570	27	7.76062e-05	165.559	0.42	0.05	0.419391	0.0500029	3.12129e-09	1570	83.1
1570	27	8.16879e-05	166.221	0.425	0.05	0.424461	0.0500067	3.27481e-09	1570	83.1
1570	27	8.6431e-05	166.695	0.43	0.05	0.429549	0.0500044	3.11319e-09	1570	83.1
1570	27	9.01416e-05	167.267	0.435	0.05	0.434723	0.0500034	3.24258e-09	1570	83.1
1570	27	9.46448e-05	167.171	0.44	0.05	0.439504	0.0500007	3.2325e-09	1570	83.1
1570	27	9.78212e-05	167.127	0.445	0.05	0.444574	0.0500031	3.12559e-09	1570	83.1
1570	27	9.89047e-05	167.179	0.45	0.05	0.449622	0.0500006	3.29156e-09	1570	83.1
1570	27	9.78386e-05	167.611	0.455	0.05	0.454376	0.0499986	3.27534e-09	1570	83.1
1570	27	9.5763e-05	167.881	0.46	0.05	0.459549	0.0500079	3.12479e-09	1570	83.1
1570	27	9.25354e-05	166.801	0.465	0.05	0.464602	0.0500052	3.26562e-09	1570	83.1
1570	27	9.33868e-05	166.693	0.47	0.05	0.469733	0.0500036	3.14523e-09	1570	83.1
1570	27	9.00357e-05	166.575	0.475	0.05	0.474437	0.050004	3.16114e-09	1570	83.1
1570	27	8.10508e-05	166.993	0.48	0.05	0.479561	0.0500063	3.21601e-09	1570	83.1
1570	27	7.33479e-05	165.663	0.485	0.05	0.484728	0.0500051	3.02553e-09	1570	83.1
1570	27	7.30737e-05	165.872	0.49	0.05	0.48948	0.0499944	3.15229e-09	1570	83.1
1570	27	7.42941e-05	166.894	0.495	0.05	0.494559	0.0500023	3.21398e-09	1570	83.1
1570	27	7.56369e-05	165.87	0.5	0.05	0.499607	0.0500093	3.15304e-09	1570	83.1
1570	27	7.89406e-05	166.436	0.505	0.05	0.504675	0.0500059	3.24224e-09	1570	83.1
1570	27	8.62763e-05	166.391	0.51	0.05	0.509456	0.0500061	3.09072e-09	1570	83.1
1570	27	8.97999e-05	166.92	0.515	0.05	0.514594	0.0499988	3.19319e-09	1570	83.1
1570	27	9.5288e-05	167.111	0.52	0.05	0.519593	0.0499965	3.28556e-09	1570	83.1
1570	27	9.9623e-05	167.794	0.525	0.05	0.524693	0.0500071	3.23804e-09	1570	83.1
1570	27	0.000102995	167.759	0.53	0.05	0.529439	0.0500062	3.17168e-09	1570	83.1
1570	27	9.84456e-05	166.892	0.535	0.05	0.534579	0.05	3.14257e-09	1570	83.1
1570	27	9.39184e-05	167.597	0.54	0.05	0.539679	0.0500047	3.22962e-09	1570	83.1
1570	27	8.95215e-05	166.663	0.545	0.05	0.544441	0.0500022	3.29584e-09	1570	83.1
1570	27	8.37463e-05	166.219	0.55	0.05	0.549479	0.0500036	3.18203e-09	1570	83.1
1570	27	8.45426e-05	165.732	0.555	0.05	0.554641	0.0500015	3.15933e-09	1570	83.1
1570	27	7.967e-05	165.95	0.56	0.05	0.559766	0.0500159	3.13324e-09	1570	83.1
1570	27	7.34043e-05	166.297	0.565	0.05	0.564463	0.0500021	3.08361e-09	1570	83.1
1570	27	7.07542e-05	165.121	0.57	0.05	0.569555	0.0500029	3.02746e-09	1570	83.1
1570	27	7.40323e-05	164.834	0.575	0.05	0.574691	0.0500055	3.12575e-09	1570	83.1
1570	27	7.79034e-05	166.295	0.58	0.05	0.57977	0.0499998	3.25343e-09	1570	83.1
1570	27	8.42293e-05	167.035	0.585	0.05	0.584504	0.050012	3.2854e-09	1570	83.1
1570	27	8.94544e-05	167.268	0.59	0.05	0.5896	0.0500024	3.24465e-09	1570	83.1
1570	27	9.46743e-05	167.118	0.595	0.05	0.594748	0.0500083	3.31067e-09	1570	83.1
1570	27	9.82228e-05	167.116	0.6	0.05	0.599466	0.050005	3.14682e-09	1570	83.1
1570	27	0.000101033	167.438	0.605	0.05	0.604588	0.0499966	3.20443e-09	1570	83.1
1570	27	9.88981e-05	166.629	0.61	0.05	0.609685	0.0500023	3.22893e-09	1570	83.1
1570	27	9.46478e-05	166.885	0.615	0.05	0.614711	0.0500059	3.2384e-09	1570	83.1
1570	27	9.56e-05	167.085	0.62	0.05	0.619504	0.0500086	3.24778e-09	1570	83.1
1570	27	9.45557e-05	166.725	0.625	0.05	0.624591	0.0500076	3.24978e-09	1570	83.1
1570	27	8.94131e-05	167.232	0.63	0.05	0.629693	0.050005	3.10271e-09	1570	83.1
1570	27	8.24087e-05	166.246	0.635	0.05	0.634799	0.0500005	3.25433e-09	1570	83.1
1570	27	7.80421e-05	166.806	0.64	0.05	0.63952	0.0500041	3.08875e-09	1570	83.1
1570	27	7.46381e-05	166.415	0.645	0.05	0.644579	0.0500029	3.10063e-09	1570	83.1
1570	27	7.13634e-05	165.875	0.65	0.05	0.649707	0.050003	3.15973e-09	1570	83.1
1570	27	7.35637e-05	165.803	0.655	0.05	0.654465	0.050004	3.1196e-09	1570	83.1
1570	27	7.74453e-05	165.622	0.66	0.05	0.659486	0.0500014	3.15294e-09	1570	83.1
1570	27	8.2769e-05	166.188	0.665	0.05	0.66461	0.0499998	3.10191e-09	1570	83.1
1570	27	8.72392e-05	166.724	0.67	0.05	0.669765	0.0499991	3.20788e-09	1570	83.1
1570	27	9.23673e-05	168.066	0.675	0.05	0.674514	0.0500098	3.14156e-09	1570	83.1
1570	27	9.72504e-05	167.3	0.68	0.05	0.679615	0.0500142	3.31154e-09	1570	83.1
1570	27	9.90011e-05	167.306	0.685	0.05	0.684679	0.0500032	3.35862e-09	1570	83.1
1570	27	0.000100057	167.845	0.69	0.05	0.689482	0.050005	3.30326e-09	1570	83.1
1570	27	0.000102978	167.413	0.695	0.05	0.694602	0.0499985	3.2789e-09	1570	83.1
1570	27	0.000100101	167.368	0.7	0.05	0.699693	0.0500033	3.35356e-09	1570	83.1
1570	27	9.32932e-05	166.613	0.705	0.05	0.704735	0.0500039	3.31006e-09	1570	83.1
1570	28	8.69888e-05	166.032	0.71	0.05	0.709519	0.0500094	3.26199e-09	1570	83.1
1570	28	8.1511e-05	166.78	0.715	0.05	0.714515	0.0500087	3.12614e-09	1570	83.1
1570	27	7.64401e-05	166.772	0.72	0.05	0.719631	0.0499992	3.24773e-09	1570	83.1
1570	27	7.06876e-05	166.515	0.725	0.05	0.724728	0.0500028	3.22929e-09	1570	83.1
1570	27	7.13895e-05	166.427	0.73	0.05	0.729543	0.0500108	3.22514e-09	1570	83.1
1570	27	7.51588e-05	166.547	0.735	0.05	0.734544	0.0500078	3.19869e-09	1570	83.1
1570	27	7.95152e-05	166.176	0.74	0.05	0.739701	0.050001	3.17132e-09	1570	83.1
1570	27	8.35124e-05	166.554	0.745	0.05	0.744374	0.050005	3.08915e-09	1570	83.1
1570	27	8.75425e-05	166.787	0.75	0.05	0.749567	0.050005	3.28173e-09	1570	83.1
1570	27	9.30092e-05	167.531	0.755	0.05	0.754671	0.0500068	3.28967e-09	1570	83.1
1570	27	9.68791e-05	167.623	0.76	0.05	0.759735	0.0500038	3.36098e-09	1570	83.1
1570	27	0.000103889	167.477	0.765	0.05	0.76453	0.0500047	3.37662e-09	1570	83.1
1570	27	0.000103908	167.496	0.77	0.05	0.769573	0.0499986	3.27932e-09	1570	83.1
1570	27	0.000102273	167.773	0.775	0.05	0.774693	0.0500067	3.24684e-09	1570	83.1
1570	27	9.93952e-05	167.198	0.78	0.05	0.779749	0.0499908	3.20675e-09	1570	83.1
1570	27	9.60491e-05	167.144	0.785	0.05	0.78449	0.0499985	3.15873e-09	1570	83.1
1570	27	8.81613e-05	166.987	0.79	0.05	0.789624	0.050005	3.1209e-09	1570	83.1
1570	27	8.17577e-05	166.473	0.795	0.05	0.794706	0.050003	3.13599e-09	1570	83.1
1570	27	7.61319e-05	165.369	0.8	0.05	0.799456	0.0499931	3.18062e-09	1570	83.1
1570	27	7.28001e-05	166.578	0.805	0.05	0.804574	0.0499978	3.06131e-09	1570	83.1
1570	27	7.26246e-05	165.99	0.81	0.05	0.809724	0.0500023	3.18406e-09	1570	83.1
1570	27	7.48e-05	165.803	0.815	0.05	0.814804	0.0500085	3.10641e-09	1570	83.1
1570	27	7.82286e-05	166.403	0.82	0.05	0.819542	0.0500108	3.27581e-09	1570	83.1
1570	27	8.27968e-05	166.237	0.825	0.05	0.82466	0.0500048	3.21051e-09	1570	83.1
1570	27	8.95315e-05	166.884	0.83	0.05	0.829701	0.0500015	3.19987e-09	1570	83.1
1570	27	9.52427e-05	167.027	0.835	0.05	0.834467	0.0499995	3.28074e-09	1570	83.1
1570	27	9.929e-05	167.299	0.84	0.05	0.839523	0.0499944	3.30863e-09	1570	83.1
1570	27	9.97949e-05	167.528	0.845	0.05	0.844602	0.049997	3.22956e-09	1570	83.1
1570	27	0.0001025	167.431	0.85	0.05	0.849768	0.049994	3.10577e-09	1570	83.1
1570	27	0.000100945	167.111	0.855	0.05	0.854527	0.049998	3.21672e-09	1570	83.1
1570	27	0.000101186	167.126	0.86	0.05	0.859636	0.0500039	3.12126e-09	1570	83.1
1570	27	9.8541e-05	167.034	0.865	0.05	0.864716	0.0500076	3.20627e-09	1570	83.1
1570	27	9.19819e-05	166.553	0.87	0.05	0.86983	0.0500027	3.22975e-09	1570	83.1
1570	27	8.4964e-05	165.649	0.875	0.05	0.874537	0.0500013	3.12275e-09	1570	83.1
1570	27	8.07296e-05	166.118	0.88	0.05	0.87964	0.0499953	3.02171e-09	1570	83.1
1570	27	7.47617e-05	165.906	0.885	0.05	0.884725	0.0500064	3.10226e-09	1570	83.1
1570	27	7.3073e-05	165.619	0.89	0.05	0.889537	0.0500049	3.01159e-09	1570	83.1
1570	27	7.28561e-05	166.098	0.895	0.05	0.894644	0.0500035	3.16279e-09	1570	83.1
1570	27	7.58284e-05	166.458	0.9	0.05	0.899724	0.0499959	3.14841e-09	1570	83.1
1570	27	7.98503e-05	166.224	0.905	0.05	0.904819	0.0500069	3.05059e-09	1570	83.1
1570	27	8.62656e-05	167.28	0.91	0.05	0.909508	0.0500022	3.23304e-09	1570	83.1
1570	27	9.35319e-05	167.044	0.915	0.05	0.914593	0.0500023	3.14253e-09	1570	83.1
1570	27	9.82699e-05	167.239	0.92	0.05	0.919731	0.0500001	3.08228e-09	1570	83.1
1570	27	9.97558e-05	167.011	0.925	0.05	0.924761	0.0500003	3.21982e-09	1570	83.1
1570	27	0.000102054	167.46	0.93	0.05	0.929553	0.0500039	3.1345e-09	1570	83.1
1570	27	0.000102932	167.138	0.935	0.05	0.934664	0.050007	3.07872e-09	1570	83.1
1570	27	9.96631e-05	166.826	0.94	0.05	0.939703	0.0500027	3.09169e-09	1570	83.1
1570	27	9.60545e-05	167.161	0.945	0.05	0.944505	0.050002	3.20719e-09	1570	83.1
1570	27	9.02347e-05	166.699	0.95	0.05	0.949615	0.0499957	3.10865e-09	1570	83.1
1570	27	8.43712e-05	166.539	0.955	0.05	0.954642	0.0500048	3.2482e-09	1570	83.1
1570	27	8.07747e-05	166.521	0.96	0.05	0.959784	0.05	3.18266e-09	1570	83.1
1570	27	7.68548e-05	166.121	0.965	0.05	0.964526	0.050004	3.14898e-09	1570	83.1
1570	27	7.41536e-05	166.882	0.97	0.05	0.969631	0.0499927	3.00038e-09	1570	83.1
1570	27	7.44649e-05	166.66	0.975	0.05	0.97465	0.0500099	3.00666e-09	1570	83.1
1570	27	7.68131e-05	166.102	0.98	0.05	0.979437	0.050001	3.12922e-09	1570	83.1
1570	27	8.09099e-05	166.624	0.985	0.05	0.984552	0.0500008	3.13444e-09	1570	83.1
1570	27	8.88288e-05	166.922	0.99	0.05	0.989665	0.0500086	3.21706e-09	1570	83.1
1570	27	9.09426e-05	166.913	0.995	0.05	0.994737	0.0500029	3.11205e-09	1570	83.1
1570	27	9.64245e-05	167.027	1	0.05	0.999469	0.0500057	3.08736e-09	1570	83.1
1570	27	0.000100061	167.525	1.005	0.05	1.00457	0.0500056	3.17738e-09	1570	83.1
1570	27	0.000105767	167.818	1.01	0.05	1.00967	0.0499995	3.10122e-09	1570	83.1
1570	27	9.93956e-05	167.529	1.015	0.05	1.01478	0.0500035	3.16279e-09	1570	83.1
1570	27	9.29801e-05	167.084	1.02	0.05	1.0195	0.0500042	3.09438e-09	1570	83.1
1570	27	8.65857e-05	166.19	1.025	0.05	1.02468	0.0500065	3.11325e-09	1570	83.1
1570	27	8.21379e-05	166.206	1.03	0.05	1.0297	0.0500033	3.09971e-09	1570	83.1
1570	27	7.55735e-05	165.671	1.035	0.05	1.03443	0.0500062	3.12897e-09	1570	83.1
1570	27	7.39357e-05	165.688	1.04	0.05	1.03954	0.0500039	3.02425e-09	1570	83.1
1570	27	7.56149e-05	166.502	1.045	0.05	1.04472	0.0500042	3.12376e-09	1570	83.1
1570	27	7.38151e-05	166.208	1.05	0.05	1.0498	0.0500042	3.18932e-09	1570	83.1
1570	27	7.47571e-05	165.181	1.055	0.05	1.05453	0.0500019	3.15421e-09	1570	83.1
1570	27	7.84585e-05	166.381	1.06	0.05	1.05961	0.0500031	3.17858e-09	1570	83.1
1570	27	8.28713e-05	166.524	1.065	0.05	1.06471	0.0500035	3.19564e-09	1570	83.1
1570	27	8.75626e-05	166.429	1.07	0.05	1.06985	0.0500039	3.11455e-09	1570	83.1
1570	27	9.08853e-05	166.697	1.075	0.05	1.07461	0.0500096	3.07377e-09	1570	83.1
1570	27	9.81707e-05	167.575	1.08	0.05	1.07968	0.0499941	3.23886e-09	1570	83.1
1570	27	0.000104523	167.486	1.085	0.05	1.08477	0.0500069	3.25091e-09	1570	83.1
1570	27	0.000102964	167.567	1.09	0.05	1.08951	0.0499967	3.14869e-09	1570	83.1
1570	27	0.000103685	167.347	1.095	0.05	1.09457	0.0499953	3.31906e-09	1570	83.1
1570	27	0.000101111	167.442	1.1	0.05	1.09971	0.0500042	3.31712e-09	1570	83.1
1570	27	9.47618e-05	166.949	1.105	0.05	1.10477	0.0500014	3.2062e-09	1570	83.1
1570	27	8.97219e-05	166.769	1.11	0.05	1.10952	0.0500081	3.17365e-09	1570	83.1
1570	27	8.45629e-05	166.58	1.115	0.05	1.11464	0.0500036	3.14835e-09	1570	83.1
1570	27	8.19336e-05	166.253	1.12	0.05	1.11971	0.0499991	3.03934e-09	1570	83.1
1570	27	7.81363e-05	165.769	1.125	0.05	1.12483	0.0500008	3.20436e-09	1570	83.1
1570	27	7.43044e-05	166.383	1.13	0.05	1.12955	0.0500012	3.05578e-09	1570	83.1
1570	27	7.53281e-05	166.438	1.135	0.05	1.13467	0.0500049	3.04527e-09	1570	83.1
1570	27	7.85519e-05	165.915	1.14	0.05	1.13971	0.0500105	3.08267e-09	1570	83.1
1570	27	8.31195e-05	166.627	1.145	0.05	1.14452	0.0500038	3.25019e-09	1570	83.1
1570	27	8.90666e-05	166.333	1.15	0.05	1.14964	0.0500127	3.16028e-09	1570	83.1
1570	27	9.43105e-05	167.342	1.155	0.05	1.15475	0.0500076	3.17694e-09	1570	83.1
1570	27	9.75568e-05	167.169	1.16	0.05	1.1598	0.0500105	3.27673e-09	1570	83.1
1570	27	0.000102079	167.17	1.165	0.05	1.1645	0.0500024	3.18092e-09	1570	83.1
1570	27	0.00010352	167.659	1.17	0.05	1.16959	0.0500018	3.17972e-09	1570	83.1
1570	27	0.000101629	167.152	1.175	0.05	1.17464	0.0499986	3.32152e-09	1570	83.1
1570	27	9.41382e-05	166.964	1.18	0.05	1.17955	0.0500113	3.22612e-09	1570	83.1
1570	27	8.99271e-05	166.901	1.185	0.05	1.18457	0.0500079	3.14904e-09	1570	83.1
1570	27	8.79024e-05	166.465	1.19	0.05	1.18968	0.0500091	3.20845e-09	1570	83.1
1570	27	8.51341e-05	166.453	1.195	0.05	1.19478	0.0499986	3.26655e-09	1570	83.1
1570	27	7.97865e-05	165.813	1.2	0.05	1.19959	0.0500056	3.22601e-09	1570	83.1
1570	27	7.6305e-05	166.716	1.205	0.05	1.20466	0.0500146	3.25145e-09	1570	83.1
1570	27	7.46135e-05	165.627	1.21	0.05	1.20965	0.0500079	3.08332e-09	1570	83.1
1570	27	7.53626e-05	166.878	1.215	0.05	1.21481	0.0500006	3.16104e-09	1570	83.1
1570	27	7.91232e-05	165.982	1.22	0.05	1.21964	0.0500053	3.13463e-09	1570	83.1
1570	27	8.39504e-05	166.427	1.225	0.05	1.22464	0.0500106	3.11099e-09	1570	83.1
1570	27	8.93863e-05	166.357	1.23	0.05	1.22974	0.0500067	3.1637e-09	1570	83.1
1570	27	9.72493e-05	167.668	1.235	0.05	1.2346	0.0500096	3.18331e-09	1570	83.1
1570	27	9.8673e-05	167.282	1.24	0.05	1.23963	0.0500042	3.26775e-09	1570	83.1
1570	27	0.000101424	167.854	1.245	0.05	1.24464	0.0499986	3.33343e-09	1570	83.1
1570	27	0.000105194	167.383	1.25	0.05	1.24983	0.0500076	3.36769e-09	1570	83.1
1570	27	9.59455e-05	167.249	1.255	0.05	1.25462	0.0500013	3.17835e-09	1570	83.1
1570	27	9.63674e-05	167.273	1.26	0.05	1.25976	0.050012	3.28868e-09	1570	83.1
1570	27	9.53496e-05	167.419	1.265	0.05	1.26477	0.050003	3.35285e-09	1570	83.1
1570	27	9.08459e-05	166.354	1.27	0.05	1.26978	0.0500126	3.26352e-09	1570	83.1
1570	27	8.43967e-05	166.185	1.275	0.05	1.27455	0.050013	3.0874e-09	1570	83.1
1570	27	7.62216e-05	166.163	1.28	0.05	1.27973	0.0500041	3.23587e-09	1570	83.1
1570	27	7.1247e-05	166.218	1.285	0.05	1.28472	0.0500135	3.22388e-09	1570	83.1
1570	27	7.16475e-05	165.679	1.29	0.05	1.2895	0.0500106	3.13363e-09	1570	83.1
1570	27	7.45357e-05	165.963	1.295	0.05	1.29464	0.0500079	3.07992e-09	1570	83.1
1570	27	7.82793e-05	166.754	1.3	0.05	1.29971	0.0500084	3.22942e-09	1570	83.1
1570	27	8.3769e-05	166.591	1.305	0.05	1.30478	0.0500038	3.21567e-09	1570	83.1
1570	27	9.05169e-05	166.797	1.31	0.05	1.3096	0.0500015	3.19843e-09	1570	83.1
1570	27	9.8335e-05	167.651	1.315	0.05	1.31457	0.0500036	3.19219e-09	1570	83.1
1570	27	9.90973e-05	166.797	1.32	0.05	1.3197	0.0499974	3.23167e-09	1570	83.1
1570	27	0.000104118	167.426	1.325	0.05	1.32449	0.0499971	3.27899e-09	1570	83.1
1570	27	0.000105577	167.263	1.33	0.05	1.32961	0.0500068	3.4081e-09	1570	83.1
1570	27	0.000101344	167.186	1.335	0.05	1.33471	0.0500093	3.25383e-09	1570	83.1
1570	27	9.9339e-05	166.988	1.34	0.05	1.33976	0.0500092	3.20528e-09	1570	83.1
1570	27	9.02148e-05	166.594	1.345	0.05	1.34457	0.0500055	3.3111e-09	1570	83.1
1570	27	8.70866e-05	166.98	1.35	0.05	1.3496	0.0500069	3.31171e-09	1570	83.1
1570	28	8.23275e-05	166.186	1.355	0.05	1.35468	0.0500141	3.27454e-09	1570	83.1
1570	27	7.86433e-05	166.139	1.36	0.05	1.35977	0.0500093	3.23492e-09	1570	83.1
1570	27	7.6082e-05	166.124	1.365	0.05	1.36452	0.0500042	3.06565e-09	1570	83.1
1570	27	7.42498e-05	166.679	1.37	0.05	1.36957	0.0500018	2.99635e-09	1570	83.1
1570	27	7.53462e-05	165.945	1.375	0.05	1.3748	0.0500006	3.18608e-09	1570	83.1
1570	27	7.95482e-05	166.041	1.38	0.05	1.37954	0.0500025	3.16488e-09	1570	83.1
1570	27	8.31083e-05	166.887	1.385	0.05	1.38465	0.0500082	3.24481e-09	1570	83.1
1570	27	8.69408e-05	167.118	1.39	0.05	1.38973	0.0500072	3.09612e-09	1570	83.1
1570	27	9.41941e-05	167.434	1.395	0.05	1.3947	0.049995	3.19457e-09	1570	83.1
1570	27	9.94864e-05	167.448	1.4	0.05	1.39957	0.0500032	3.29864e-09	1570	83.1
1570	27	0.000101792	167.881	1.405	0.05	1.40465	0.0500038	3.32349e-09	1570	83.1
1570	27	0.00010599	167.767	1.41	0.05	1.40974	0.0500119	3.2374e-09	1570	83.1
1570	27	0.000105025	167.816	1.415	0.05	1.41475	0.0500104	3.30373e-09	1570	83.1
1570	27	0.000103375	167.532	1.42	0.05	1.41953	0.0500073	3.20797e-09	1570	83.1
1570	27	9.82065e-05	167.297	1.425	0.05	1.42475	0.0500055	3.13108e-09	1570	83.1
1570	27	9.41726e-05	166.701	1.43	0.05	1.42977	0.0500079	3.17881e-09	1570	83.1
1570	27	8.74344e-05	165.79	1.435	0.05	1.43454	0.0500077	3.19308e-09	1570	83.1
1570	27	8.08569e-05	166.666	1.44	0.05	1.43958	0.0500107	3.02283e-09	1570	83.1
1570	27	7.36501e-05	166.304	1.445	0.05	1.44469	0.0500011	3.17607e-09	1570	83.1
1570	27	7.31151e-05	165.811	1.45	0.05	1.44982	0.0500085	3.03632e-09	1570	83.1
1570	27	7.28674e-05	166.272	1.455	0.05	1.45454	0.0500119	3.06616e-09	1570	83.1
1570	27	7.78935e-05	166.092	1.46	0.05	1.45969	0.0500095	3.17807e-09	1570	83.1
1570	27	8.37873e-05	166.019	1.465	0.05	1.46474	0.0500051	3.17128e-09	1570	83.1
1570	27	8.85366e-05	167.138	1.47	0.05	1.46949	0.0500159	3.23084e-09	1570	83.1
1570	27	9.21076e-05	167.364	1.475	0.05	1.47463	0.0500084	3.23927e-09	1570	83.1
1570	27	9.84936e-05	167.447	1.48	0.05	1.47971	0.0500098	3.24967e-09	1570	83.1
1570	27	0.000103279	167.635	1.485	0.05	1.48474	0.0500067	3.24577e-09	1570	83.1
1570	27	0.000103889	167.399	1.49	0.05	1.48956	0.0500098	3.15665e-09	1570	83.1
1570	27	0.000103035	166.621	1.495	0.05	1.49461	0.0500138	3.25181e-09	1570	83.1
1570	27	9.91345e-05	166.811	1.5	0.05	1.49965	0.050012	3.04002e-09	1570	83.1
1570	27	9.49435e-05	166.889	1.505	0.05	1.50483	0.0500052	3.22518e-09	1570	83.1
1570	27	9.22741e-05	166.985	1.51	0.05	1.5095	0.0500121	3.11621e-09	1570	83.1
1570	27	8.48184e-05	166.227	1.515	0.05	1.51464	0.0500069	3.1024e-09	1570	83.1
1570	27	7.85818e-05	165.842	1.52	0.05	1.51973	0.0500081	3.04435e-09	1570	83.1
1570	27	7.373e-05	166.835	1.525	0.05	1.52449	0.0500039	3.00275e-09	1570	83.1
1570	27	7.27594e-05	166.137	1.53	0.05	1.5296	0.0500142	3.1239e-09	1570	83.1
1570	27	7.36821e-05	165.873	1.535	0.05	1.53468	0.0500115	3.15428e-09	1570	83.1
1570	27	7.71627e-05	165.695	1.54	0.05	1.53983	0.0500025	3.15025e-09	1570	83.1
1570	27	8.07435e-05	165.988	1.545	0.05	1.54466	0.0500001	3.18499e-09	1570	83.1
1570	27	9.04238e-05	166.874	1.55	0.05	1.54972	0.0500026	3.07342e-09	1570	83.1
1570	27	9.50686e-05	167.281	1.555	0.05	1.55472	0.0499983	3.23372e-09	1570	83.1
1570	27	0.000100201	167.369	1.56	0.05	1.55982	0.0500051	3.25346e-09	1570	83.1
1570	27	0.00010229	166.611	1.565	0.05	1.56454	0.0500063	3.17202e-09	1570	83.1
1570	27	0.000104554	167.461	1.57	0.05	1.56969	0.0500087	3.16066e-09	1570	83.1
1570	27	0.000103485	167.318	1.575	0.05	1.57482	0.0500106	3.29698e-09	1570	83.1
1570	27	9.83504e-05	166.957	1.58	0.05	1.57954	0.0500038	3.21235e-09	1570	83.1
1570	27	9.24948e-05	166.933	1.585	0.05	1.58465	0.0500042	3.05615e-09	1570	83.1
1570	27	8.49841e-05	165.791	1.59	0.05	1.58969	0.0500054	3.10313e-09	1570	83.1
1570	27	7.975e-05	166.244	1.595	0.05	1.5948	0.0500109	3.09463e-09	1570	83.1
1570	27	7.53608e-05	166.013	1.6	0.05	1.59961	0.0500097	3.15314e-09	1570	83.1
1570	27	7.5493e-05	166.125	1.605	0.05	1.6046	0.0500118	3.02356e-09	1570	83.1
1570	27	7.50935e-05	165.803	1.61	0.05	1.60975	0.0500036	3.08732e-09	1570	83.1
1570	27	7.58883e-05	166.345	1.615	0.05	1.61479	0.0500029	3.21635e-09	1570	83.1
1570	27	7.87212e-05	166.058	1.62	0.05	1.6196	0.0500041	3.07202e-09	1570	83.1
1570	27	8.28983e-05	166.817	1.625	0.05	1.62467	0.0500019	3.10749e-09	1570	83.1
1570	27	8.94201e-05	166.873	1.63	0.05	1.6298	0.0500055	3.09122e-09	1570	83.1
1570	27	9.40895e-05	167.297	1.635	0.05	1.63451	0.0499976	3.14651e-09	1570	83.1
1570	27	9.90762e-05	167.612	1.64	0.05	1.63956	0.0500033	3.10412e-09	1570	83.1
1570	27	0.000101541	167.169	1.645	0.05	1.64467	0.0500015	3.25673e-09	1570	83.1
1570	27	0.000104583	167.598	1.65	0.05	1.64977	0.0500051	3.3433e-09	1570	83.1
1570	27	0.000104755	167.333	1.655	0.05	1.65453	0.0500161	3.15382e-09	1570	83.1
1570	27	0.000100837	167.123	1.66	0.05	1.65964	0.0500106	3.23957e-09	1570	83.1
1570	27	9.4327e-05	166.686	1.665	0.05	1.66473	0.0500099	3.07232e-09	1570	83.1
1570	27	8.78786e-05	166.751	1.67	0.05	1.66948	0.050009	3.09042e-09	1570	83.1
1570	27	7.84978e-05	166.26	1.675	0.05	1.67462	0.0500151	3.15047e-09	1570	83.1
1570	27	7.47092e-05	165.959	1.68	0.05	1.6797	0.0500177	3.17982e-09	1570	83.1
1570	27	7.32811e-05	165.516	1.685	0.05	1.68478	0.0500028	3.04293e-09	1570	83.1
1570	27	7.52072e-05	165.878	1.69	0.05	1.68953	0.0500033	3.01576e-09	1570	83.1
1570	27	7.75113e-05	165.869	1.695	0.05	1.69457	0.0500094	3.0537e-09	1570	83.1
1570	27	8.11575e-05	166.78	1.7	0.05	1.69968	0.050009	3.11238e-09	1570	83.1
1570	27	8.80814e-05	166.94	1.705	0.05	1.70483	0.0500027	3.20017e-09	1570	83.1
1570	27	9.27766e-05	167.267	1.71	0.05	1.70958	0.0500016	3.28621e-09	1570	83.1
1570	27	9.77934e-05	167.397	1.715	0.05	1.71468	0.0500085	3.20906e-09	1570	83.1
1570	27	9.90238e-05	167.386	1.72	0.05	1.71978	0.0500051	3.25975e-09	1570	83.1
1570	27	0.000104914	167.432	1.725	0.05	1.7245	0.0500043	3.32776e-09	1570	83.1
1570	27	0.000105034	167.586	1.73	0.05	1.72958	0.0500039	3.15445e-09	1570	83.1
1570	27	0.000103586	167.417	1.735	0.05	1.73472	0.050006	3.11869e-09	1570	83.1
1570	27	9.80736e-05	167.249	1.74	0.05	1.73975	0.0499963	3.293e-09	1570	83.1
1570	27	9.05221e-05	167.224	1.745	0.05	1.74449	0.0500018	3.22123e-09	1570	83.1
1570	27	8.35973e-05	166.851	1.75	0.05	1.74967	0.0500106	3.22887e-09	1570	83.1
1570	27	7.79803e-05	166.781	1.755	0.05	1.75473	0.0500102	3.06724e-09	1570	83.1
1570	27	7.42605e-05	165.605	1.76	0.05	1.75985	0.0500046	3.16574e-09	1570	83.1
1570	27	7.37508e-05	165.976	1.765	0.05	1.7647	0.050007	3.01981e-09	1570	83.1
1570	27	7.512e-05	165.458	1.77	0.05	1.7697	0.0500136	3.05046e-09	1570	83.1
1570	27	7.71448e-05	165.937	1.775	0.05	1.77478	0.0500126	3.06466e-09	1570	83.1
1570	27	8.31642e-05	166.101	1.78	0.05	1.77958	0.0500048	3.08476e-09	1570	83.1
1570	27	9.02728e-05	166.642	1.785	0.05	1.78463	0.05001	3.26571e-09	1570	83.1
1570	27	9.58559e-05	166.866	1.79	0.05	1.78976	0.0499989	3.24775e-09	1570	83.1
1570	27	9.88303e-05	167.271	1.795	0.05	1.79483	0.0500031	3.23501e-09	1570	83.1
1570	27	0.000101069	167.784	1.8	0.05	1.79967	0.0500035	3.25895e-09	1570	83.1
1570	27	0.000101888	167.133	1.805	0.05	1.80459	0.0499984	3.20334e-09	1570	83.1
1570	27	0.000101992	167.044	1.81	0.05	1.80968	0.0500003	3.18157e-09	1570	83.1
1570	27	9.82022e-05	166.691	1.815	0.05	1.81448	0.0500024	3.24562e-09	1570	83.1
1570	27	9.29541e-05	166.738	1.82	0.05	1.81963	0.0500007	3.16857e-09	1570	83.1
1570	27	8.7392e-05	166.177	1.825	0.05	1.82471	0.0500103	3.2873e-09	1570	83.1
1570	27	8.37802e-05	166.161	1.83	0.05	1.82983	0.0500113	3.06911e-09	1570	83.1
1570	27	7.80945e-05	165.993	1.835	0.05	1.83465	0.0500077	3.06222e-09	1570	83.1
1570	27	7.3681e-05	166.151	1.84	0.05	1.83969	0.0500153	3.219e-09	1570	83.1
1570	27	7.40758e-05	166.231	1.845	0.05	1.84478	0.0500166	3.19862e-09	1570	83.1
1570	27	7.56895e-05	166.167	1.85	0.05	1.84991	0.0500157	3.2096e-09	1570	83.1
1570	27	7.86402e-05	166.248	1.855	0.05	1.85466	0.0500058	3.10261e-09	1570	83.1
1570	27	8.44767e-05	166.942	1.86	0.05	1.85978	0.0500034	3.25519e-09	1570	83.1
1570	27	9.05853e-05	167.523	1.865	0.05	1.86481	0.0500102	3.27464e-09	1570	83.1
1570	27	9.46476e-05	166.726	1.87	0.05	1.86951	0.050003	3.27954e-09	1570	83.1
1570	27	9.6783e-05	166.965	1.875	0.05	1.87465	0.050013	3.2562e-09	1570	83.1
1570	27	0.000100553	166.75	1.88	0.05	1.8798	0.050006	3.20274e-09	1570	83.1
1570	27	0.000103577	167.963	1.885	0.05	1.88483	0.0500097	3.13181e-09	1570	83.1
1570	27	0.000102037	167.399	1.89	0.05	1.88963	0.0500117	3.27952e-09	1570	83.1
1570	27	0.000101761	167.085	1.895	0.05	1.89471	0.0500054	3.26501e-09	1570	83.1
1570	27	9.71737e-05	166.517	1.9	0.05	1.89981	0.0500093	3.27908e-09	1570	83.1
1570	27	8.9891e-05	166.217	1.905	0.05	1.90487	0.0500038	3.10404e-09	1570	83.1
1570	27	8.25177e-05	166.313	1.91	0.05	1.90972	0.0500053	3.03719e-09	1570	83.1
1570	27	7.7965e-05	166.57	1.915	0.05	1.91482	0.0500045	3.06834e-09	1570	83.1
1570	27	7.75463e-05	165.727	1.92	0.05	1.91987	0.0499995	3.06152e-09	1570	83.1
1570	27	7.85996e-05	166.265	1.925	0.05	1.9246	0.0500092	3.0419e-09	1570	83.1
1570	27	7.64504e-05	167.119	1.93	0.05	1.92968	0.0500023	2.98038e-09	1570	83.1
1570	27	7.62152e-05	166.519	1.935	0.05	1.93477	0.0500121	3.12726e-09	1570	83.1
1570	27	8.09287e-05	166.655	1.94	0.05	1.93984	0.0500105	3.1798e-09	1570	83.1
1570	27	8.50658e-05	166.36	1.945	0.05	1.94465	0.0500031	3.10695e-09	1570	83.1
1570	27	9.07916e-05	166.917	1.95	0.05	1.94966	0.0500094	3.23101e-09	1570	83.1
1570	27	9.56447e-05	167.784	1.955	0.05	1.95475	0.0500058	3.25463e-09	1570	83.1
1570	27	9.89447e-05	167.51	1.96	0.05	1.95957	0.0500081	3.20803e-09	1570	83.1
1570	27	0.000101492	167.62	1.965	0.05	1.96471	0.0500055	3.28622e-09	1570	83.1
1570	27	0.000103322	167.93	1.97	0.05	1.96971	0.0500082	3.14339e-09	1570	83.1
1570	27	0.000104027	167.483	1.975	0.05	1.97474	0.0500035	3.22739e-09	1570	83.1
1570	27	9.84909e-05	167.018	1.98	0.05	1.97956	0.0500062	3.15265e-09	1570	83.1
1570	27	9.68145e-05	167.434	1.985	0.05	1.98467	0.0500094	3.21537e-09	1570	83.1
1570	27	8.56258e-05	166.505	1.99	0.05	1.98975	0.0500097	3.14701e-09	1570	83.1
1570	27	7.59415e-05	166.587	1.995	0.05	1.99489	0.0500042	3.09225e-09	1570	83.1
1570	27	7.56908e-05	166.526	2	0.05	1.99962	0.0500003	3.01085e-09	1570	83.1
1570	27	7.65065e-05	166.757	2.005	0.05	2.00469	0.0500053	2.95817e-09	1570	83.1
1570	27	7.63803e-05	166.34	2.01	0.05	2.00986	0.0500093	2.99453e-09	1570	83.1
1570	27	7.70468e-05	165.682	2.015	0.05	2.01461	0.0500143	3.00416e-09	1570	83.1
1570	27	8.04168e-05	166.624	2.02	0.05	2.01971	0.050005	2.99277e-09	1570	83.1
1570	27	8.70274e-05	167.28	2.025	0.05	2.02476	0.0500076	3.16486e-09	1570	83.1
1570	27	9.38808e-05	167.686	2.03	0.05	2.02984	0.0500065	3.14039e-09	1570	83.1
1570	27	0.000101245	167.486	2.035	0.05	2.03459	0.0500105	3.10311e-09	1570	83.1
1570	27	0.00010164	167	2.04	0.05	2.03967	0.0500113	3.2201e-09	1570	83.1
1570	27	0.000104721	167.376	2.045	0.05	2.04474	0.0500154	3.13039e-09	1570	83.1
1570	27	0.000106464	167.52	2.05	0.05	2.04989	0.0500124	3.33732e-09	1570	83.1
1570	27	0.000102496	167.074	2.055	0.05	2.05468	0.0500092	3.2403e-09	1570	83.1
1570	27	9.81101e-05	167.67	2.06	0.05	2.05978	0.0500111	3.25936e-09	1570	83.1
1570	27	8.49573e-05	166.477	2.065	0.05	2.0649	0.0500002	3.12325e-09	1570	83.1
1570	27	8.09094e-05	165.931	2.07	0.05	2.06964	0.0500005	3.19188e-09	1570	83.1
1570	27	8.17435e-05	166.295	2.075	0.05	2.07468	0.0500067	3.17548e-09	1570	83.1
1570	27	7.57995e-05	165.713	2.08	0.05	2.07976	0.050005	3.08904e-09	1570	83.1
1570	27	7.47542e-05	165.695	2.085	0.05	2.08487	0.0500114	3.10505e-09	1570	83.1
1570	27	7.53714e-05	166.029	2.09	0.05	2.08966	0.0500119	2.99144e-09	1570	83.1
1570	27	7.85485e-05	165.965	2.095	0.05	2.09477	0.0500041	3.05051e-09	1570	83.1
1570	27	8.47751e-05	166.661	2.1	0.05	2.09982	0.0500033	3.20942e-09	1570	83.1
1570	27	8.93101e-05	166.859	2.105	0.05	2.10487	0.0500086	3.13923e-09	1570	83.1
1570	27	9.39903e-05	166.667	2.11	0.05	2.10965	0.050013	3.07843e-09	1570	83.1
1570	27	9.9906e-05	167.217	2.115	0.05	2.11474	0.0500089	3.10998e-09	1570	83.1
1570	27	0.000102026	167.554	2.12	0.05	2.11983	0.0500059	3.12793e-09	1570	83.1
1570	27	0.000105098	167.274	2.125	0.05	2.1246	0.0500131	3.15686e-09	1570	83.1
1570	27	0.000107885	167.769	2.13	0.05	2.12969	0.0500109	3.11101e-09	1570	83.1
1570	27	0.000102886	167.145	2.135	0.05	2.1348	0.0500091	3.16801e-09	1570	83.1
1570	27	8.67293e-05	165.79	2.14	0.05	2.13988	0.0500064	3.05419e-09	1570	83.1
1570	27	8.15858e-05	166.198	2.145	0.05	2.14466	0.0500134	3.16939e-09	1570	83.1
1570	27	7.62179e-05	166.085	2.15	0.05	2.14982	0.0500075	3.13866e-09	1570	83.1
1570	27	7.37553e-05	166.208	2.155	0.05	2.15492	0.0500093	3.19774e-09	1570	83.1
1570	27	7.45195e-05	165.84	2.16	0.05	2.15957	0.0500142	3.14322e-09	1570	83.1
1570	27	7.36769e-05	165.852	2.165	0.05	2.16471	0.0500098	3.12848e-09	1570	83.1
1570	28	7.49985e-05	166.596	2.17	0.05	2.16975	0.0500097	3.01209e-09	1570	83.1
1570	27	7.99021e-05	166.313	2.175	0.05	2.1749	0.0500041	2.99895e-09	1570	83.1
1570	27	8.37686e-05	166.3	2.18	0.05	2.17965	0.0500112	3.14008e-09	1570	83.1
1570	27	9.19641e-05	166.706	2.185	0.05	2.18473	0.0500128	3.21833e-09	1570	83.1
1570	27	9.53387e-05	167.519	2.19	0.05	2.18979	0.0500053	3.08118e-09	1570	83.1
1570	27	9.99298e-05	167.232	2.195	0.05	2.19493	0.0500068	3.15908e-09	1570	83.1
1570	27	0.000101084	167.504	2.2	0.05	2.1997	0.0500081	3.17671e-09	1570	83.1
1570	27	9.95197e-05	166.93	2.205	0.05	2.20478	0.0500091	3.18801e-09	1570	83.1
1570	27	9.90356e-05	167.152	2.21	0.05	2.20991	0.0500096	3.28794e-09	1570	83.1
1570	27	9.67521e-05	167.383	2.215	0.05	2.21463	0.050003	3.18638e-09	1570	83.1
1570	27	8.96784e-05	167.333	2.22	0.05	2.21975	0.0500051	3.28321e-09	1570	83.1
1570	27	8.30888e-05	166.417	2.225	0.05	2.22488	0.0500083	3.2155e-09	1570	83.1
1570	27	7.7646e-05	166.182	2.23	0.05	2.22992	0.0500142	3.09408e-09	1570	83.1
1570	27	7.77483e-05	166.365	2.235	0.05	2.23469	0.0500175	3.19436e-09	1570	83.1
1570	27	7.43091e-05	165.592	2.24	0.05	2.23977	0.050012	3.22071e-09	1570	83.1
1570	27	7.42553e-05	166.005	2.245	0.05	2.24485	0.0500149	3.13766e-09	1570	83.1
1570	27	7.65876e-05	165.713	2.25	0.05	2.24996	0.0500118	3.03888e-09	1570	83.1
1570	27	8.03458e-05	166.082	2.255	0.05	2.25465	0.0500129	3.10982e-09	1570	83.1
1570	27	8.24769e-05	166.013	2.26	0.05	2.25984	0.0500053	3.17738e-09	1570	83.1
1570	27	8.81537e-05	167.056	2.265	0.05	2.26487	0.0500166	3.25026e-09	1570	83.1
1570	27	9.35123e-05	166.952	2.27	0.05	2.26964	0.050012	3.14384e-09	1570	83.1
1570	27	9.88541e-05	167.003	2.275	0.05	2.27477	0.0500185	3.2984e-09	1570	83.1
1570	27	0.00010217	167.894	2.28	0.05	2.27978	0.0500169	3.22818e-09	1570	83.1
1570	27	0.000103542	167.438	2.285	0.05	2.2849	0.0500099	3.33033e-09	1570	83.1
1570	27	0.000101757	167.139	2.29	0.05	2.28963	0.0500095	3.26291e-09	1570	83.1
1570	27	0.000100674	167.511	2.295	0.05	2.29482	0.0500076	3.13698e-09	1570	83.1
1570	27	9.58304e-05	166.829	2.3	0.05	2.29987	0.0500102	3.11789e-09	1570	83.1
1570	27	8.92674e-05	166.411	2.305	0.05	2.30455	0.0500107	3.239e-09	1570	83.1
1570	27	8.24794e-05	166.025	2.31	0.05	2.30961	0.0500076	3.15674e-09	1570	83.1
1570	27	7.90974e-05	166.577	2.315	0.05	2.31478	0.0500137	3.17996e-09	1570	83.1
1570	27	7.62429e-05	165.837	2.32	0.05	2.3199	0.0500099	3.06123e-09	1570	83.1
1570	27	7.46024e-05	166.215	2.325	0.05	2.32463	0.0500138	2.99285e-09	1570	83.1
1570	27	7.67656e-05	167.12	2.33	0.05	2.32966	0.0500086	3.18009e-09	1570	83.1
1570	27	7.81179e-05	166.131	2.335	0.05	2.33479	0.050014	3.09077e-09	1570	83.1
1570	27	8.01856e-05	166.53	2.34	0.05	2.33991	0.0500024	3.16966e-09	1570	83.1
1570	27	8.4944e-05	166.536	2.345	0.05	2.34468	0.0499942	3.10306e-09	1570	83.1
1570	27	9.21285e-05	166.49	2.35	0.05	2.34974	0.0500064	3.08667e-09	1570	83.1
1570	27	9.56807e-05	166.784	2.355	0.05	2.35486	0.0500141	3.2282e-09	1570	83.1
1570	27	9.89049e-05	166.745	2.36	0.05	2.35963	0.0500063	3.19623e-09	1570	83.1
1570	27	0.000101747	167.371	2.365	0.05	2.36473	0.0500018	3.12934e-09	1570	83.1
1570	27	0.000102787	166.299	2.37	0.05	2.36983	0.0500161	3.07344e-09	1570	83.1
1570	27	0.000100259	166.329	2.375	0.05	2.37489	0.050006	3.12249e-09	1570	83.1
1570	27	9.82348e-05	167.587	2.38	0.05	2.37964	0.0500118	3.27576e-09	1570	83.1
1570	27	9.33151e-05	166.631	2.385	0.05	2.38476	0.0500064	3.07222e-09	1570	83.1
1570	27	8.44114e-05	166.473	2.39	0.05	2.38981	0.0500102	3.16686e-09	1570	83.1
1570	28	7.99474e-05	166.304	2.395	0.05	2.39491	0.0500097	3.15335e-09	1570	83.1
1570	27	7.84099e-05	166.573	2.4	0.05	2.39966	0.050008	3.13501e-09	1570	83.1
1570	27	7.46021e-05	166.914	2.405	0.05	2.40472	0.0500088	3.00075e-09	1570	83.1
1570	27	7.24978e-05	166.18	2.41	0.05	2.40983	0.0500114	3.10072e-09	1570	83.1
1570	27	7.64872e-05	165.773	2.415	0.05	2.41466	0.0500099	3.12014e-09	1570	83.1
1570	27	7.91016e-05	166.412	2.42	0.05	2.41967	0.0500048	2.99336e-09	1570	83.1
1570	27	8.49592e-05	166.14	2.425	0.05	2.42481	0.0500053	3.15649e-09	1570	83.1
1570	27	8.92197e-05	166.302	2.43	0.05	2.42992	0.0500157	3.1293e-09	1570	83.1
1570	27	9.58554e-05	166.79	2.435	0.05	2.43461	0.0500163	3.22717e-09	1570	83.1
1570	27	0.00010152	167.353	2.44	0.05	2.43979	0.050008	3.19956e-09	1570	83.1
1570	27	0.000104282	167.806	2.445	0.05	2.4448	0.0500014	3.11304e-09	1570	83.1
1570	27	0.000104277	167.291	2.45	0.05	2.44966	0.0500085	3.14363e-09	1570	83.1
1570	27	9.96538e-05	166.911	2.455	0.05	2.45475	0.0500034	3.2396e-09	1570	83.1
1570	27	0.000100236	166.863	2.46	0.05	2.45981	0.0500123	3.03246e-09	1570	83.1
1570	27	9.49381e-05	166.508	2.465	0.05	2.4649	0.0500143	3.1182e-09	1570	83.1
1570	27	8.9443e-05	167.066	2.47	0.05	2.46967	0.0500109	3.01429e-09	1570	83.1
1570	27	8.39564e-05	165.941	2.475	0.05	2.47475	0.050014	3.09875e-09	1570	83.1
1570	27	7.89579e-05	166.486	2.48	0.05	2.4798	0.0500153	2.98858e-09	1570	83.1
1570	27	7.56048e-05	166.166	2.485	0.05	2.48488	0.0500081	3.13272e-09	1570	83.1
1570	27	7.4334e-05	166.099	2.49	0.05	2.48965	0.0500086	3.01832e-09	1570	83.1
1570	27	7.61396e-05	165.927	2.495	0.05	2.49483	0.0500017	3.15454e-09	1570	83.1
1570	27	8.11394e-05	166.692	2.5	0.05	2.49985	0.0500074	3.0141e-09	1570	83.1
1570	27	8.54771e-05	166.484	2.505	0.05	2.5046	0.0500119	3.05141e-09	1570	83.1
1570	27	9.0314e-05	167.166	2.51	0.05	2.50973	0.0500132	3.22352e-09	1570	83.1
1570	27	9.31095e-05	167.264	2.515	0.05	2.51484	0.0500022	3.06703e-09	1570	83.1
1570	27	9.6772e-05	167.384	2.52	0.05	2.52005	0.0500023	3.04895e-09	1570	83.1
1570	27	0.000102007	167.562	2.525	0.05	2.5248	0.0500043	3.24572e-09	1570	83.1
1570	27	0.000103389	167.799	2.53	0.05	2.52979	0.0500094	3.21782e-09	1570	83.1
1570	27	0.000105302	167.209	2.535	0.05	2.5349	0.0500109	3.13032e-09	1570	83.1
1570	27	9.81734e-05	167.1	2.54	0.05	2.53993	0.0500061	3.21356e-09	1570	83.1
1570	27	9.16246e-05	166.344	2.545	0.05	2.54469	0.0500069	3.03638e-09	1570	83.1
1570	27	8.60704e-05	166.535	2.55	0.05	2.54984	0.0500135	3.0354e-09	1570	83.1
1570	27	8.35103e-05	166.74	2.555	0.05	2.55491	0.0500127	3.05038e-09	1570	83.1
1570	27	8.20723e-05	166.761	2.56	0.05	2.5597	0.0500059	3.17156e-09	1570	83.1
1570	27	7.85912e-05	167.165	2.565	0.05	2.56479	0.0500072	3.0273e-09	1570	83.1
1570	27	7.57975e-05	166.865	2.57	0.05	2.56986	0.050009	3.05512e-09	1570	83.1
1570	27	7.76416e-05	166.129	2.575	0.05	2.57491	0.0500076	3.1398e-09	1570	83.1
1570	27	8.06256e-05	166.415	2.58	0.05	2.57978	0.0500116	3.05086e-09	1570	83.1
1570	27	8.62477e-05	167.069	2.585	0.05	2.58482	0.0500161	3.21234e-09	1570	83.1
1570	27	9.33862e-05	166.582	2.59	0.05	2.58989	0.0500105	3.06241e-09	1570	83.1
1570	27	9.59283e-05	167.026	2.595	0.05	2.59498	0.0500151	3.25352e-09	1570	83.1
1570	27	0.000100076	167.721	2.6	0.05	2.59977	0.0500011	3.12339e-09	1570	83.1
1570	27	0.000100015	167.788	2.605	0.05	2.60477	0.0500017	3.18956e-09	1570	83.1
1570	27	0.000105041	167.204	2.61	0.05	2.60978	0.0500165	3.09913e-09	1570	83.1
1570	27	0.000104293	167.929	2.615	0.05	2.61457	0.0500012	3.13653e-09	1570	83.1
1570	27	9.8384e-05	167.033	2.62	0.05	2.61973	0.0500077	3.139e-09	1570	83.1
1570	27	9.30376e-05	166.848	2.625	0.05	2.6248	0.0500042	3.08866e-09	1570	83.1
1570	27	8.91951e-05	166.584	2.63	0.05	2.62989	0.049999	3.00989e-09	1570	83.1
1570	27	8.33222e-05	166.241	2.635	0.05	2.63462	0.0500002	2.99705e-09	1570	83.1
1570	27	7.83314e-05	166.547	2.64	0.05	2.63979	0.0500135	2.97246e-09	1570	83.1
1570	27	7.57614e-05	165.889	2.645	0.05	2.64494	0.0500135	2.99892e-09	1570	83.1
1570	27	7.76613e-05	166.063	2.65	0.05	2.64967	0.0500074	3.10564e-09	1570	83.1
1570	27	7.85496e-05	166.309	2.655	0.05	2.65467	0.0500113	3.11073e-09	1570	83.1
1570	27	8.05077e-05	165.951	2.66	0.05	2.65981	0.0500089	3.17139e-09	1570	83.1
1570	27	8.50417e-05	166.344	2.665	0.05	2.66487	0.0500053	3.07912e-09	1570	83.1
1570	27	9.11422e-05	167.204	2.67	0.05	2.6697	0.0500102	3.24169e-09	1570	83.1
1570	27	9.61949e-05	167.138	2.675	0.05	2.67473	0.0500048	3.22161e-09	1570	83.1
1570	27	9.91935e-05	167.628	2.68	0.05	2.67981	0.0500079	3.24116e-09	1570	83.1
1570	27	0.000101644	167.306	2.685	0.05	2.6849	0.0500142	3.11091e-09	1570	83.1
1570	27	0.000102543	167.494	2.69	0.05	2.68974	0.0500062	3.2897e-09	1570	83.1
1570	27	0.00010289	167.415	2.695	0.05	2.69478	0.050018	3.29895e-09	1570	83.1
1570	27	9.99414e-05	167.072	2.7	0.05	2.69985	0.050009	3.15241e-09	1570	83.1
1570	27	9.42706e-05	166.117	2.705	0.05	2.70462	0.0500038	3.07337e-09	1570	83.1
1570	27	8.81759e-05	166.479	2.71	0.05	2.70973	0.0500001	3.15855e-09	1570	83.1
1570	27	8.10473e-05	166.055	2.715	0.05	2.71486	0.0500034	3.04799e-09	1570	83.1
1570	27	7.65261e-05	166.642	2.72	0.05	2.71997	0.0500027	3.03787e-09	1570	83.1
1570	27	7.53866e-05	165.656	2.725	0.05	2.72471	0.0500071	3.20945e-09	1570	83.1
1570	27	7.70966e-05	165.982	2.73	0.05	2.72976	0.0500081	3.14038e-09	1570	83.1
1570	27	7.98501e-05	166.476	2.735	0.05	2.73484	0.0500107	3.11497e-09	1570	83.1
1570	27	8.32032e-05	166.096	2.74	0.05	2.73995	0.0500119	3.06624e-09	1570	83.1
1570	27	8.62536e-05	166.554	2.745	0.05	2.74466	0.0500172	3.24405e-09	1570	83.1
1570	27	9.17974e-05	167.001	2.75	0.05	2.74981	0.0500129	3.10294e-09	1570	83.1
1570	27	9.76114e-05	167.317	2.755	0.05	2.75494	0.0500064	3.2415e-09	1570	83.1
1570	27	0.0001005	167.595	2.76	0.05	2.75969	0.0500068	3.21472e-09	1570	83.1
1570	27	0.000101608	167.437	2.765	0.05	2.76476	0.050015	3.29234e-09	1570	83.1
1570	27	0.000102913	167.09	2.77	0.05	2.76988	0.0500101	3.20882e-09	1570	83.1
1570	27	0.000102284	167.287	2.775	0.05	2.77492	0.0500148	3.14486e-09	1570	83.1
1570	27	9.97515e-05	167.438	2.78	0.05	2.77974	0.0500141	3.2518e-09	1570	83.1
1570	27	9.85072e-05	166.887	2.785	0.05	2.78486	0.0500121	3.26291e-09	1570	83.1
1570	27	9.74022e-05	167.093	2.79	0.05	2.7898	0.0500024	3.20625e-09	1570	83.1
1570	27	8.76252e-05	166.935	2.795	0.05	2.79455	0.0500079	3.20658e-09	1570	83.1
1570	27	8.11189e-05	166.338	2.8	0.05	2.79963	0.0500094	2.9982e-09	1570	83.1
1570	27	7.53715e-05	165.918	2.805	0.05	2.80485	0.0500067	2.94952e-09	1570	83.1
1570	27	7.16649e-05	166.722	2.81	0.05	2.80992	0.0500044	2.94302e-09	1570	83.1
1570	27	7.42007e-05	165.974	2.815	0.05	2.8147	0.0500088	3.0928e-09	1570	83.1
1570	27	7.74656e-05	165.698	2.82	0.05	2.81979	0.0500048	3.05049e-09	1570	83.1
1570	27	8.16119e-05	166.156	2.825	0.05	2.8248	0.0500129	3.09241e-09	1570	83.1
1570	27	8.64279e-05	167.406	2.83	0.05	2.82991	0.0500059	3.05084e-09	1570	83.1
1570	27	9.24898e-05	167.297	2.835	0.05	2.83474	0.0500031	3.22916e-09	1570	83.1
1570	27	9.88662e-05	167.334	2.84	0.05	2.83982	0.0500045	3.24246e-09	1570	83.1
1570	27	0.000102661	167.208	2.845	0.05	2.84488	0.0500097	3.09951e-09	1570	83.1
1570	27	0.000105044	167.172	2.85	0.05	2.84964	0.0500018	3.06201e-09	1570	83.1
1570	27	0.000106286	167.608	2.855	0.05	2.85478	0.0500064	3.25688e-09	1570	83.1
1570	27	0.000102255	166.965	2.86	0.05	2.85982	0.0500038	3.21531e-09	1570	83.1
1570	27	9.99821e-05	166.976	2.865	0.05	2.86494	0.0500088	3.1165e-09	1570	83.1
1570	27	9.21118e-05	166.836	2.87	0.05	2.86975	0.0500078	3.04382e-09	1570	83.1
1570	27	8.90539e-05	166.671	2.875	0.05	2.87477	0.0500045	3.12834e-09	1570	83.1
1570	27	8.17325e-05	166.765	2.88	0.05	2.87982	0.0500006	3.08446e-09	1570	83.1
1570	27	7.71181e-05	166.169	2.885	0.05	2.88494	0.0499995	3.01281e-09	1570	83.1
1570	27	7.3001e-05	165.726	2.89	0.05	2.88972	0.0500038	3.07636e-09	1570	83.1
1570	27	7.45822e-05	165.5	2.895	0.05	2.89485	0.0500035	2.95543e-09	1570	83.1
1570	27	7.79246e-05	166.207	2.9	0.05	2.89993	0.0500041	3.13027e-09	1570	83.1
1570	27	8.01387e-05	166.57	2.905	0.05	2.90467	0.0500068	2.93282e-09	1570	83.1
1570	27	8.65907e-05	166.701	2.91	0.05	2.90978	0.0500062	3.11044e-09	1570	83.1
1570	27	9.01168e-05	166.909	2.915	0.05	2.91486	0.0500042	3.18043e-09	1570	83.1
1570	27	9.58146e-05	168.031	2.92	0.05	2.91997	0.0500062	3.19722e-09	1570	83.1
1570	27	0.000100375	167.494	2.925	0.05	2.92478	0.0500101	3.2541e-09	1570	83.1
1570	27	0.000101992	167.408	2.93	0.05	2.9298	0.0500081	3.11381e-09	1570	83.1
1570	27	0.000102384	167.147	2.935	0.05	2.93483	0.0500095	3.09612e-09	1570	83.1
1570	27	0.000100875	167.254	2.94	0.05	2.93964	0.0500073	3.12792e-09	1570	83.1
1570	27	0.000100085	166.537	2.945	0.05	2.94476	0.0500055	3.14546e-09	1570	83.1
1570	27	9.36779e-05	167.025	2.95	0.05	2.9498	0.0499983	3.09929e-09	1570	83.1
1570	27	8.49566e-05	166.212	2.955	0.05	2.95484	0.0499978	3.02314e-09	1569.9	83.1
1570	27	7.60063e-05	166.169	2.96	0.05	2.95962	0.0499987	3.01402e-09	1570	83.1
1570	27	7.2447e-05	166.421	2.965	0.05	2.96474	0.0500017	3.00735e-09	1570	83.1
1570	27	7.21082e-05	165.779	2.97	0.05	2.96995	0.0500049	3.10136e-09	1570	83.1
1570	27	7.54172e-05	166.148	2.975	0.05	2.97492	0.0500042	3.09925e-09	1570	83.1
1570	27	7.59148e-05	165.723	2.98	0.05	2.97973	0.0500097	3.14455e-09	1570	83.1
1570	27	8.04536e-05	165.979	2.985	0.05	2.98478	0.0500037	3.01759e-09	1570	83.1
1570	27	8.513e-05	166.678	2.99	0.05	2.98986	0.0500088	3.02279e-09	1570	83.1
1570	27	9.07763e-05	166.865	2.995	0.05	2.99468	0.0500034	3.19451e-09	1570	83.1
1570	27	9.53169e-05	167.597	3	0.05	2.99978	0.0500082	3.07427e-09	1570	83.1
1570	27	9.76019e-05	167.155	3.005	0.05	3.00486	0.0500138	3.11888e-09	1570	83.1
1570	27	0.000102535	167.482	3.01	0.05	3.0099	0.0500187	3.23765e-09	1570	83.1
1570	27	0.000100886	167.313	3.015	0.05	3.0147	0.0500142	3.09889e-09	1570	83.1
1570	27	9.88025e-05	167.043	3.02	0.05	3.0197	0.050002	3.19135e-09	1570	83.1
1570	27	9.42758e-05	167.225	3.025	0.05	3.02482	0.050006	3.18817e-09	1570	83.1
1570	27	8.91262e-05	166.459	3.03	0.05	3.02999	0.0500088	3.04489e-09	1570	83.1
1570	27	8.876e-05	166.103	3.035	0.05	3.03469	0.050008	3.09397e-09	1570	83.1
1570	27	8.04461e-05	166.12	3.04	0.05	3.03979	0.0500036	3.10227e-09	1570	83.1
1570	27	7.50693e-05	166.387	3.045	0.05	3.0449	0.0500041	3.11188e-09	1570	83.1
1570	27	7.45268e-05	166.408	3.05	0.05	3.04975	0.0500053	3.16935e-09	1570	83.1
1570	27	7.45588e-05	166.008	3.055	0.05	3.05479	0.0500103	2.95705e-09	1570	83.1
1570	27	7.62348e-05	165.666	3.06	0.05	3.05985	0.0500136	3.09187e-09	1570	83.1
1570	28	7.96325e-05	166.296	3.065	0.05	3.0649	0.0500068	2.98574e-09	1570	83.1
1570	27	8.41833e-05	166.592	3.07	0.05	3.0698	0.0500096	3.145e-09	1570	83.1
1570	27	9.16024e-05	166.635	3.075	0.05	3.07484	0.050003	3.15168e-09	1570	83.1
1570	27	9.44827e-05	167.22	3.08	0.05	3.07994	0.0500125	3.08781e-09	1570	83.1
1570	27	0.000100526	167.062	3.085	0.05	3.08496	0.0500126	3.20979e-09	1570	83.1
1570	27	0.000102546	167.179	3.09	0.05	3.08984	0.0500031	3.10411e-09	1570	83.1
1570	27	0.000106422	167.551	3.095	0.05	3.09483	0.0500023	3.29895e-09	1570	83.1
1570	27	0.000104918	167.155	3.1	0.05	3.09992	0.0500051	3.22295e-09	1570	83.1
1570	27	0.000100178	166.999	3.105	0.05	3.10465	0.0500065	3.13381e-09	1570	83.1
1570	27	9.25342e-05	166.901	3.11	0.05	3.10982	0.0500087	3.19541e-09	1570	83.1
1570	27	8.56421e-05	166.857	3.115	0.05	3.11491	0.0500109	3.02476e-09	1570	83.1
1570	27	8.13701e-05	166.081	3.12	0.05	3.1199	0.0500023	3.11828e-09	1570	83.1
1570	27	7.79787e-05	166.076	3.125	0.05	3.12478	0.0500073	3.12086e-09	1570	83.1
1570	27	7.27357e-05	166.168	3.13	0.05	3.12992	0.0500109	3.03017e-09	1570	83.1
1570	27	7.38886e-05	166.177	3.135	0.05	3.13491	0.0500039	2.98129e-09	1570	83.1
1570	27	7.52068e-05	166.592	3.14	0.05	3.13972	0.0500036	2.99147e-09	1570	83.1
1570	27	8.0488e-05	166.738	3.145	0.05	3.14479	0.0500108	3.12086e-09	1570	83.1
1570	27	8.87601e-05	166.384	3.15	0.05	3.14989	0.0500069	3.18058e-09	1570	83.1
1570	27	9.46964e-05	167.398	3.155	0.05	3.15492	0.050017	3.22817e-09	1570	83.1
1570	27	9.81933e-05	167.729	3.16	0.05	3.15976	0.0500149	3.25476e-09	1570	83.1
1570	27	9.93186e-05	167.212	3.165	0.05	3.16482	0.0500115	3.24774e-09	1570	83.1
1570	27	0.000102888	167.959	3.17	0.05	3.16993	0.0500093	3.13619e-09	1570	83.1
1570	27	9.98163e-05	167.327	3.175	0.05	3.17503	0.0500077	3.20918e-09	1570	83.1
1570	27	9.76225e-05	167.401	3.18	0.05	3.17983	0.0500082	3.09435e-09	1570	83.1
1570	27	9.46065e-05	166.769	3.185	0.05	3.18501	0.0500087	3.0919e-09	1570	83.1
1570	27	8.97119e-05	165.745	3.19	0.05	3.19001	0.050013	3.27994e-09	1570	83.1
1570	27	8.76852e-05	165.859	3.195	0.05	3.19472	0.0500163	3.1003e-09	1570	83.1
1570	27	8.30557e-05	166.326	3.2	0.05	3.19983	0.0500188	3.13218e-09	1570	83.1
1570	27	8.04032e-05	166.292	3.205	0.05	3.20494	0.050003	3.1314e-09	1570	83.1
1570	27	7.69079e-05	166.498	3.21	0.05	3.21004	0.050009	3.00471e-09	1570	83.1
1570	27	7.39828e-05	166.249	3.215	0.05	3.2148	0.050011	2.96417e-09	1570	83.1
1570	27	7.44136e-05	166.432	3.22	0.05	3.21983	0.0500063	2.98508e-09	1570	83.1
1570	27	7.92622e-05	165.881	3.225	0.05	3.22496	0.050009	3.1184e-09	1570	83.1
1570	27	8.5065e-05	165.896	3.23	0.05	3.23004	0.0500104	3.1257e-09	1570	83.1
1570	27	9.14161e-05	167.614	3.235	0.05	3.23482	0.0500111	3.20665e-09	1570	83.1
1570	27	9.85602e-05	167.819	3.24	0.05	3.23989	0.0500072	3.22674e-09	1570	83.1
1570	27	9.97504e-05	167.941	3.245	0.05	3.24494	0.0500048	3.1818e-09	1570	83.1
1570	27	0.000102091	167.439	3.25	0.05	3.24973	0.0500039	3.15323e-09	1570	83.1
1570	27	0.000101902	167.297	3.255	0.05	3.25481	0.0500106	3.24419e-09	1570	83.1
1570	27	0.000103606	167.362	3.26	0.05	3.25994	0.050008	3.1088e-09	1570	83.1
1570	27	9.85824e-05	167.512	3.265	0.05	3.26509	0.0500142	3.12915e-09	1570	83.1
1570	27	9.2485e-05	167.301	3.27	0.05	3.26977	0.0500125	3.03696e-09	1570	83.1
1570	27	8.97582e-05	166.223	3.275	0.05	3.27481	0.0500198	3.16204e-09	1570	83.1
1570	27	8.40893e-05	165.751	3.28	0.05	3.27992	0.0500185	2.94668e-09	1570	83.1
1570	27	7.66801e-05	166.287	3.285	0.05	3.28463	0.0500109	2.96865e-09	1570	83.1
1570	27	7.3185e-05	166.578	3.29	0.05	3.2898	0.0500166	3.08227e-09	1570	83.1
1570	27	7.31742e-05	165.843	3.295	0.05	3.29489	0.0500111	3.03039e-09	1570	83.1
1570	27	7.47092e-05	165.819	3.3	0.05	3.29996	0.0500177	2.91797e-09	1570	83.1
1570	27	7.81982e-05	165.603	3.305	0.05	3.30479	0.0500185	3.1526e-09	1570	83.1
1570	27	8.43904e-05	166.496	3.31	0.05	3.30981	0.0500047	3.08557e-09	1570	83.1
1570	27	8.84506e-05	166.438	3.315	0.05	3.31488	0.0500132	3.13377e-09	1570	83.1
1570	27	9.50218e-05	167.028	3.32	0.05	3.31998	0.0500067	3.00897e-09	1570	83.1
1570	27	9.93879e-05	167.543	3.325	0.05	3.32475	0.0500111	3.01741e-09	1570	83.1
1570	27	0.000100561	167.291	3.33	0.05	3.32981	0.0500059	3.08679e-09	1570	83.1
1570	27	0.000103931	167.506	3.335	0.05	3.33498	0.0500133	3.10541e-09	1570	83.1
1570	27	0.000100803	166.789	3.34	0.05	3.33975	0.0500223	3.26664e-09	1570	83.1
1570	27	9.90134e-05	167.187	3.345	0.05	3.34479	0.0500018	3.14505e-09	1570	83.1
1570	27	9.67046e-05	167.096	3.35	0.05	3.34996	0.0500129	3.12595e-09	1570	83.1
1570	27	9.09872e-05	166.992	3.355	0.05	3.35498	0.0500111	3.20369e-09	1570	83.1
1570	27	8.25127e-05	166.454	3.36	0.05	3.35966	0.0500095	3.10085e-09	1570	83.1
1570	27	7.42213e-05	165.992	3.365	0.05	3.36475	0.0500119	2.97562e-09	1570	83.1
1570	27	7.18616e-05	166.728	3.37	0.05	3.36989	0.0500124	3.04321e-09	1570	83.1
1570	27	7.27728e-05	166.707	3.375	0.05	3.37506	0.0500099	3.03518e-09	1570	83.1
1570	27	7.65899e-05	166.303	3.38	0.05	3.37982	0.0500172	3.13967e-09	1570	83.1
1570	28	8.00867e-05	166.893	3.385	0.05	3.3849	0.0500165	3.12903e-09	1570	83.1
1570	27	8.47893e-05	166.978	3.39	0.05	3.38996	0.0500184	2.98746e-09	1570	83.1
1570	27	8.85705e-05	166.559	3.395	0.05	3.39475	0.0500108	3.00894e-09	1570	83.1
1570	27	9.42413e-05	167.108	3.4	0.05	3.39979	0.0500083	3.03122e-09	1570	83.1
1570	27	0.000101023	167.433	3.405	0.05	3.40489	0.0500118	3.05365e-09	1570	83.1
1570	27	0.000102313	167.535	3.41	0.05	3.41	0.0500084	3.23133e-09	1570	83.1
1570	27	0.000106202	168.276	3.415	0.05	3.41481	0.0500122	3.1774e-09	1570	83.1
1570	27	0.000103973	167.661	3.42	0.05	3.41991	0.0500059	3.10382e-09	1570	83.1
1570	27	9.95622e-05	167.153	3.425	0.05	3.42491	0.0499971	3.20789e-09	1570	83.1
1570	28	9.19226e-05	166.864	3.43	0.05	3.42974	0.0499992	3.11011e-09	1570	83.1
1570	27	8.00387e-05	166.283	3.435	0.05	3.4348	0.0499984	2.95697e-09	1570	83.1
1570	27	7.47824e-05	166.398	3.44	0.05	3.43987	0.0500031	2.98988e-09	1570	83.1
1570	27	7.46487e-05	166.258	3.445	0.05	3.44498	0.0500013	3.08969e-09	1570	83.1
1570	27	7.47175e-05	166.328	3.45	0.05	3.44977	0.0500026	2.90444e-09	1570	83.1
1570	27	7.50692e-05	166.455	3.455	0.05	3.45489	0.0500042	2.96931e-09	1570	83.1
1570	27	7.63389e-05	165.921	3.46	0.05	3.45997	0.0500148	2.98424e-09	1570	83.1
1570	27	7.94372e-05	165.556	3.465	0.05	3.46504	0.0500149	3.1256e-09	1570	83.1
1570	27	8.7497e-05	166.7	3.47	0.05	3.4698	0.0500105	3.01026e-09	1570	83.1
1570	27	9.00768e-05	167.033	3.475	0.05	3.47484	0.0500121	3.1038e-09	1570	83.1
1570	27	9.60394e-05	166.434	3.48	0.05	3.47997	0.0500133	3.08967e-09	1570	83.1
1570	27	0.00010166	167.211	3.485	0.05	3.48479	0.0500156	3.05294e-09	1570	83.1
1570	27	0.000102399	166.874	3.49	0.05	3.48988	0.0500088	3.10669e-09	1570	83.1
1570	27	0.000103151	167.38	3.495	0.05	3.49501	0.0500097	3.08299e-09	1570	83.1
1570	27	0.000103304	167.248	3.5	0.05	3.50004	0.0500126	3.2208e-09	1570	83.1
1570	27	0.000101177	166.851	3.505	0.05	3.50483	0.050014	3.07422e-09	1570	83.1
1570	27	9.56723e-05	167.457	3.51	0.05	3.50993	0.0500132	3.17661e-09	1570	83.1
1570	27	8.87144e-05	167.647	3.515	0.05	3.51496	0.050007	3.07396e-09	1570	83.1
1570	27	8.28266e-05	166.143	3.52	0.05	3.52005	0.0500055	3.07137e-09	1570	83.1
1570	27	7.83369e-05	166.748	3.525	0.05	3.52478	0.0500005	2.9804e-09	1570	83.1
1570	27	7.25842e-05	167.061	3.53	0.05	3.52997	0.0500127	3.16514e-09	1570	83.1
1570	27	7.36675e-05	165.556	3.535	0.05	3.53499	0.0500119	3.06174e-09	1570	83.1
1570	27	7.79762e-05	165.978	3.54	0.05	3.53975	0.0500186	3.07002e-09	1570	83.1
1570	27	8.32893e-05	165.585	3.545	0.05	3.54486	0.0500143	3.02373e-09	1570	83.1
1570	27	8.92559e-05	166.475	3.55	0.05	3.54991	0.0500082	3.18378e-09	1570	83.1
1570	27	9.25214e-05	167.404	3.555	0.05	3.555	0.0500052	3.06962e-09	1570	83.1
1570	27	9.84237e-05	168.068	3.56	0.05	3.55983	0.0500088	3.07941e-09	1570	83.1
1570	28	0.000100509	168.156	3.565	0.05	3.56485	0.0500126	3.09028e-09	1570	83.1
1570	27	0.000100846	167.911	3.57	0.05	3.57	0.0500085	3.24319e-09	1570	83.1
1570	27	0.000100787	168.027	3.575	0.05	3.57515	0.0500123	3.23423e-09	1570	83.1
1570	27	9.6997e-05	167.231	3.58	0.05	3.57981	0.0500001	3.2172e-09	1570	83.1
1570	27	9.20018e-05	166.801	3.585	0.05	3.58491	0.0500133	3.14619e-09	1570	83.1
1570	27	8.71375e-05	165.806	3.59	0.05	3.59003	0.0500102	3.16353e-09	1570	83.1
1570	27	8.08604e-05	167.227	3.595	0.05	3.59471	0.0500078	3.19044e-09	1570	83.1
1570	27	7.68114e-05	166.776	3.6	0.05	3.59985	0.0500152	3.18036e-09	1570	83.1
1570	27	7.34907e-05	166.588	3.605	0.05	3.60492	0.0500084	3.11435e-09	1570	83.1
1570	27	7.28028e-05	165.66	3.61	0.05	3.61	0.0499978	3.06797e-09	1570	83.1
1570	27	7.56105e-05	166.244	3.615	0.05	3.61475	0.0500013	3.1448e-09	1570	83.1
1570	27	7.99439e-05	166.308	3.62	0.05	3.61984	0.0500131	3.11021e-09	1570	83.1
1570	27	8.45447e-05	166.766	3.625	0.05	3.62498	0.0500143	3.12635e-09	1570	83.1
1570	27	8.76742e-05	167.082	3.63	0.05	3.62978	0.0500133	3.18389e-09	1570	83.1
1570	27	9.38386e-05	166.976	3.635	0.05	3.63488	0.0500078	3.1275e-09	1570	83.1
1570	27	9.71121e-05	167.25	3.64	0.05	3.63996	0.0500059	3.25758e-09	1570	83.1
1570	27	0.000100911	167.862	3.645	0.05	3.64502	0.0500042	3.25613e-09	1570	83.1
1570	27	0.000103723	167.406	3.65	0.05	3.64976	0.0500022	3.16133e-09	1570	83.1
1570	27	0.000100063	167.52	3.655	0.05	3.65485	0.0500075	3.1358e-09	1570	83.1
1570	27	9.72178e-05	166.921	3.66	0.05	3.66	0.0500105	3.09055e-09	1570	83.1
1570	27	9.43084e-05	167.435	3.665	0.05	3.66502	0.0500066	3.11291e-09	1570	83.1
1570	27	8.43711e-05	166.684	3.67	0.05	3.66981	0.0500071	2.99385e-09	1570	83.1
1570	27	7.94599e-05	166.098	3.675	0.05	3.67488	0.0500075	2.97058e-09	1570	83.1
1570	27	7.67176e-05	165.736	3.68	0.05	3.67991	0.0500117	2.97397e-09	1570	83.1
1570	27	7.25113e-05	165.802	3.685	0.05	3.68486	0.0500102	3.09048e-09	1570	83.1
1570	27	7.14679e-05	165.237	3.69	0.05	3.68988	0.0500061	3.03536e-09	1570	83.1
1570	27	7.39986e-05	166.075	3.695	0.05	3.69495	0.0500138	3.14422e-09	1570	83.1
1570	27	7.71339e-05	166.663	3.7	0.05	3.7	0.0500133	2.9967e-09	1570	83.1
1570	27	8.25497e-05	166.737	3.705	0.05	3.70485	0.0500141	3.00236e-09	1570	83.1
1570	27	8.78565e-05	166.712	3.71	0.05	3.70992	0.0500052	3.10286e-09	1570	83.1
1570	27	9.26413e-05	167.084	3.715	0.05	3.71497	0.0500042	3.14958e-09	1570	83.1
1570	27	9.68114e-05	166.979	3.72	0.05	3.72006	0.0500078	3.09624e-09	1570	83.1
1570	27	0.000100715	167.246	3.725	0.05	3.72489	0.0500051	3.05072e-09	1570	83.1
1570	27	0.000101497	166.92	3.73	0.05	3.7299	0.050008	3.14853e-09	1570	83.1
1570	27	0.000101929	167.245	3.735	0.05	3.73495	0.0500067	3.05734e-09	1570	83.1
1570	27	9.83727e-05	166.779	3.74	0.05	3.73976	0.0500004	3.1127e-09	1570	83.1
1570	27	9.6303e-05	166.914	3.745	0.05	3.74488	0.0500051	3.19312e-09	1570	83.1
1570	28	8.86859e-05	166.721	3.75	0.05	3.74989	0.0500143	3.04622e-09	1570	83.1
1570	27	8.3406e-05	166.41	3.755	0.05	3.75502	0.0500146	3.11741e-09	1570	83.1
1570	27	7.79371e-05	166.04	3.76	0.05	3.75979	0.0499997	2.94233e-09	1570	83.1
1570	27	7.34611e-05	166.287	3.765	0.05	3.76486	0.0500081	3.0928e-09	1570	83.1
1570	27	7.1665e-05	166.021	3.77	0.05	3.76996	0.0499971	3.05231e-09	1570	83.1
1570	27	7.2589e-05	166.389	3.775	0.05	3.77471	0.0500051	3.03217e-09	1570	83.1
1570	27	7.619e-05	166.455	3.78	0.05	3.7798	0.0500082	3.08617e-09	1570	83.1
1570	27	7.93267e-05	166.65	3.785	0.05	3.7849	0.0500049	2.94027e-09	1570	83.1
1570	27	8.41709e-05	166.407	3.79	0.05	3.79002	0.050005	3.00478e-09	1570	83.1
1570	27	8.95829e-05	167.199	3.795	0.05	3.79478	0.050014	3.11795e-09	1570	83.1
1570	27	9.32826e-05	166.134	3.8	0.05	3.79991	0.0500078	3.06936e-09	1570	83.1
1570	27	9.82219e-05	167.175	3.805	0.05	3.80497	0.0500017	3.04453e-09	1570	83.1
1570	27	0.000101152	167.45	3.81	0.05	3.81003	0.0500108	3.03413e-09	1570	83.1
1570	27	0.000101771	167.43	3.815	0.05	3.81487	0.050003	3.22972e-09	1570	83.1
1570	27	9.82202e-05	166.947	3.82	0.05	3.8199	0.0500037	3.23294e-09	1570	83.1
1570	27	9.54026e-05	166.339	3.825	0.05	3.82501	0.050013	3.00421e-09	1570	83.1
1570	27	8.72332e-05	166.833	3.83	0.05	3.82971	0.0500078	2.93878e-09	1570	83.1
1570	27	8.10259e-05	166.301	3.835	0.05	3.83488	0.0500078	2.9975e-09	1570	83.1
1570	27	7.6329e-05	166.368	3.84	0.05	3.83997	0.0500073	3.00968e-09	1570	83.1
1570	27	7.20408e-05	166.281	3.845	0.05	3.84494	0.0500048	3.05257e-09	1570	83.1
1570	27	7.05925e-05	166.277	3.85	0.05	3.84989	0.0500078	2.93439e-09	1570	83.1
1570	27	7.22334e-05	166.071	3.855	0.05	3.85498	0.0500057	3.05613e-09	1570	83.1
1570	27	7.73915e-05	165.839	3.86	0.05	3.86006	0.050007	2.95093e-09	1570	83.1
1570	27	8.35374e-05	166.495	3.865	0.05	3.86511	0.0500105	3.15443e-09	1570	83.1
1570	27	8.8498e-05	166.954	3.87	0.05	3.86991	0.0500007	3.06413e-09	1570	83.1
1570	27	9.27299e-05	166.758	3.875	0.05	3.87497	0.0500099	3.14111e-09	1570	83.1
1570	27	9.87947e-05	167.243	3.88	0.05	3.87997	0.0500091	3.10808e-09	1570	83.1
1570	27	0.000103647	167.772	3.885	0.05	3.88476	0.0500025	3.05105e-09	1570	83.1
1570	28	0.000104264	167.717	3.89	0.05	3.88985	0.0500061	3.21879e-09	1570	83.1
1570	27	0.000103658	167.69	3.895	0.05	3.89499	0.0500014	3.17743e-09	1570	83.1
1570	27	9.89097e-05	167.138	3.9	0.05	3.90009	0.0500114	3.15536e-09	1570	83.1
1570	27	9.25732e-05	166.957	3.905	0.05	3.90477	0.0500098	3.18135e-09	1570	83.1
1570	27	8.93691e-05	166.359	3.91	0.05	3.90984	0.0500026	3.01473e-09	1570	83.1
1570	27	8.20004e-05	166.79	3.915	0.05	3.91497	0.0500128	3.1091e-09	1570	83.1
1570	27	7.55302e-05	166.687	3.92	0.05	3.91977	0.0500063	3.02699e-09	1570	83.1
1570	27	7.19125e-05	166.244	3.925	0.05	3.92483	0.0500024	3.0387e-09	1570	83.1
1570	27	7.0453e-05	165.948	3.93	0.05	3.9299	0.0500032	2.97565e-09	1570	83.1
1570	27	7.30717e-05	166.04	3.935	0.05	3.93498	0.0500046	2.95765e-09	1570	83.1
1570	27	7.83482e-05	165.79	3.94	0.05	3.93977	0.0500062	3.16466e-09	1570	83.1
1570	27	8.33998e-05	166.016	3.945	0.05	3.94484	0.0500049	3.04626e-09	1570	83.1
1570	27	8.69408e-05	166.785	3.95	0.05	3.94993	0.0500073	3.19755e-09	1570	83.1
1570	27	9.13209e-05	166.822	3.955	0.05	3.95504	0.050007	3.18414e-09	1570	83.1
1570	27	9.80518e-05	167.235	3.96	0.05	3.95974	0.0500067	3.27277e-09	1570	83.1
1570	27	0.000103567	167.911	3.965	0.05	3.9649	0.0500042	3.28855e-09	1570	83.1
1570	27	0.000105737	167.102	3.97	0.05	3.97002	0.0500127	3.23439e-09	1570	83.1
1570	27	0.000104274	167.488	3.975	0.05	3.97469	0.0500086	3.26274e-09	1570	83.1
1570	27	0.000101001	167.572	3.98	0.05	3.9798	0.0500166	3.20694e-09	1570	83.1
1570	27	9.56767e-05	167.346	3.985	0.05	3.98487	0.0500102	3.1433e-09	1570	83.1
1570	27	8.98105e-05	166.478	3.99	0.05	3.98998	0.0500058	3.04779e-09	1570	83.1
1570	27	8.48534e-05	166.265	3.995	0.05	3.99474	0.050014	3.03301e-09	1570	83.1
1570	27	8.27269e-05	166.777	4	0.05	3.99993	0.0500042	3.01071e-09	1570	83.1
1570	27	7.77779e-05	166.81	4.005	0.05	4.005	0.0500056	3.14705e-09	1570	83.1
1570	27	7.60248e-05	166.081	4.01	0.05	4.01005	0.0500056	2.98614e-09	1570	83.1
1570	27	7.72947e-05	166.264	4.015	0.05	4.01481	0.0500054	3.10357e-09	1570	83.1
1570	27	7.99003e-05	166.638	4.02	0.05	4.01988	0.0500078	3.05769e-09	1570	83.1
1570	27	8.55236e-05	167.053	4.025	0.05	4.02496	0.0500053	3.20282e-09	1570	83.1
1570	27	8.94987e-05	167.106	4.03	0.05	4.0298	0.0500086	3.18246e-09	1570	83.1
1570	27	9.28143e-05	166.85	4.035	0.05	4.03482	0.0500056	3.03908e-09	1570	83.1
1570	27	9.72572e-05	167.185	4.04	0.05	4.03993	0.0500113	3.1813e-09	1570	83.1
1570	27	0.000102998	167.918	4.045	0.05	4.04513	0.0500096	3.16548e-09	1570	83.1
1570	27	0.000104172	167.865	4.05	0.05	4.0499	0.0500039	3.26907e-09	1569.9	83.1
1570	27	0.000101652	167.491	4.055	0.05	4.05494	0.0499944	3.10603e-09	1570	83.1
1570	27	9.92104e-05	167.682	4.06	0.05	4.06008	0.0500036	3.24173e-09	1570	83.1
1570	27	9.44257e-05	166.963	4.065	0.05	4.06509	0.0500069	3.27337e-09	1570	83.1
1570	27	9.23008e-05	167.06	4.07	0.05	4.06986	0.0499996	3.08249e-09	1570	83.1
1570	27	8.78535e-05	166.272	4.075	0.05	4.07494	0.0500025	3.05798e-09	1570	83.1
1570	27	8.22281e-05	166.455	4.08	0.05	4.08002	0.0500166	3.15373e-09	1570	83.1
1570	27	7.61156e-05	165.682	4.085	0.05	4.08472	0.0500072	3.14872e-09	1570	83.1
1570	27	7.37704e-05	165.894	4.09	0.05	4.0899	0.0500074	3.15239e-09	1570	83.1
1570	27	7.51756e-05	166.624	4.095	0.05	4.095	0.0500088	3.16293e-09	1570	83.1
1570	27	7.96147e-05	166.585	4.1	0.05	4.10011	0.0500099	3.10057e-09	1570	83.1
1570	27	8.34156e-05	165.551	4.105	0.05	4.10484	0.0500043	3.10542e-09	1570	83.1
1570	27	8.86526e-05	166.697	4.11	0.05	4.10984	0.0500078	3.11361e-09	1570	83.1
1570	27	9.32189e-05	167.479	4.115	0.05	4.11498	0.0500104	3.27717e-09	1570	83.1
1570	28	0.000100643	167.496	4.12	0.05	4.11975	0.0500173	3.12883e-09	1570	83.1
1570	27	0.000103221	167.675	4.125	0.05	4.12478	0.0500111	3.2527e-09	1570	83.1
1570	27	0.000104497	167.219	4.13	0.05	4.12989	0.0500055	3.15485e-09	1570	83.1
1570	27	0.000101759	167.234	4.135	0.05	4.135	0.0500064	3.25221e-09	1570	83.1
1570	27	0.000100883	167.267	4.14	0.05	4.13976	0.0500145	3.11272e-09	1570	83.1
1570	27	0.000101047	167.039	4.145	0.05	4.1449	0.0500091	3.17407e-09	1570	83.1
1570	27	9.68845e-05	167.279	4.15	0.05	4.14997	0.0500037	3.18323e-09	1570	83.1
1570	27	8.84332e-05	166.787	4.155	0.05	4.15503	0.050006	2.99698e-09	1570	83.1
1570	27	8.37107e-05	166.695	4.16	0.05	4.15982	0.0500085	2.97052e-09	1570	83.1
1570	27	7.81509e-05	165.979	4.165	0.05	4.16496	0.0500082	3.01257e-09	1570	83.1
1570	27	7.29711e-05	165.216	4.17	0.05	4.17007	0.0500006	3.00718e-09	1570	83.1
1570	27	7.26678e-05	166.35	4.175	0.05	4.17485	0.049999	2.98403e-09	1570	83.1
1570	27	7.57315e-05	166.046	4.18	0.05	4.17988	0.0500081	3.10955e-09	1570	83.1
1570	27	7.90229e-05	166.797	4.185	0.05	4.18493	0.0500106	3.14238e-09	1570	83.1
1570	27	8.45326e-05	166.494	4.19	0.05	4.19003	0.0499975	3.05041e-09	1570	83.1
1570	27	8.98084e-05	166.973	4.195	0.05	4.19484	0.050002	3.12546e-09	1570	83.1
1570	27	9.71008e-05	167.051	4.2	0.05	4.19998	0.050002	3.04999e-09	1570	83.1
1570	27	0.000100422	166.95	4.205	0.05	4.20506	0.0500093	3.16474e-09	1570	83.1
1570	27	0.000104773	167.618	4.21	0.05	4.21009	0.0500061	3.18429e-09	1570	83.1
1570	27	0.000102437	167.52	4.215	0.05	4.2149	0.05	3.21926e-09	1570	83.1
1570	27	0.000103734	167.511	4.22	0.05	4.21988	0.050003	3.20523e-09	1570	83.1
1570	27	0.000102197	167.597	4.225	0.05	4.22505	0.0500067	3.12742e-09	1570	83.1
1570	27	9.83367e-05	167.384	4.23	0.05	4.22978	0.0500004	3.00394e-09	1570	83.1
1570	27	8.71933e-05	166.96	4.235	0.05	4.23493	0.0499983	3.0843e-09	1570	83.1
1570	27	7.6963e-05	166.631	4.24	0.05	4.23994	0.0500104	2.99904e-09	1570	83.1
1570	27	7.31142e-05	166.347	4.245	0.05	4.24504	0.0500036	2.99282e-09	1570	83.1
1570	27	7.22033e-05	166.072	4.25	0.05	4.24983	0.0500084	2.96371e-09	1570	83.1
1570	27	7.17733e-05	165.435	4.255	0.05	4.2549	0.0500065	2.9667e-09	1570	83.1
1570	27	7.3963e-05	166.237	4.26	0.05	4.25998	0.0500091	2.94591e-09	1570	83.1
1570	27	7.72221e-05	165.456	4.265	0.05	4.26473	0.0500115	2.9849e-09	1570	83.1
1570	27	8.29374e-05	165.879	4.27	0.05	4.26986	0.050007	2.95666e-09	1570	83.1
1570	27	9.25808e-05	166.978	4.275	0.05	4.2749	0.0500156	3.06532e-09	1570	83.1
1570	27	9.75243e-05	167.376	4.28	0.05	4.28001	0.0500109	3.19142e-09	1570	83.1
1570	27	0.000100242	167.098	4.285	0.05	4.28482	0.0500064	3.12461e-09	1570	83.1
1570	27	0.000102876	167.399	4.29	0.05	4.28987	0.0500131	3.05218e-09	1570	83.1
1570	27	0.000105943	167.858	4.295	0.05	4.29493	0.0500144	3.06478e-09	1570	83.1
1570	27	0.000104483	167.412	4.3	0.05	4.3	0.0500075	3.06379e-09	1570	83.1
1570	27	0.000101681	167.297	4.305	0.05	4.30482	0.0500103	3.10946e-09	1570	83.1
1570	27	9.47868e-05	166.593	4.31	0.05	4.30995	0.0500111	3.2009e-09	1570	83.1
1570	27	8.2098e-05	167.246	4.315	0.05	4.31504	0.0500158	2.96499e-09	1570	83.1
1570	27	7.62232e-05	165.9	4.32	0.05	4.31977	0.0500091	3.1262e-09	1570	83.1
1570	27	7.26666e-05	166.395	4.325	0.05	4.32492	0.0500141	2.95647e-09	1570	83.1
1570	27	7.16913e-05	166.259	4.33	0.05	4.33003	0.0500086	3.08011e-09	1570	83.1
1570	27	7.50916e-05	166.12	4.335	0.05	4.33505	0.0500072	2.95437e-09	1570	83.1
1570	27	7.48168e-05	166.784	4.34	0.05	4.33983	0.0500024	3.03546e-09	1570	83.1
1570	27	7.90633e-05	166.506	4.345	0.05	4.34478	0.0500036	2.99809e-09	1570	83.1
1570	27	8.5273e-05	167.453	4.35	0.05	4.34993	0.0500128	3.09819e-09	1570	83.1
1570	28	9.48259e-05	167.318	4.355	0.05	4.35504	0.0500059	3.10529e-09	1570	83.1
1570	27	9.97357e-05	167.077	4.36	0.05	4.35982	0.0500175	3.21082e-09	1570	83.1
1570	27	0.000101261	167.518	4.365	0.05	4.36493	0.0500186	3.2098e-09	1570	83.1
1570	27	0.000100688	167.49	4.37	0.05	4.37003	0.0500083	3.09985e-09	1570	83.1
1570	27	0.000103018	167.439	4.375	0.05	4.37477	0.0500166	3.19502e-09	1570	83.1
1570	27	9.97629e-05	167.541	4.38	0.05	4.37983	0.0500119	3.1023e-09	1570	83.1
1570	27	9.51053e-05	166.735	4.385	0.05	4.38496	0.0500142	2.98291e-09	1570	83.1
1570	27	9.10793e-05	166.365	4.39	0.05	4.39007	0.0500136	2.99649e-09	1570	83.1
1570	27	8.49536e-05	166.646	4.395	0.05	4.39487	0.0500026	3.07603e-09	1570	83.1
1570	27	7.73165e-05	166.452	4.4	0.05	4.39998	0.0499995	3.09888e-09	1570	83.1
1570	27	7.22718e-05	165.738	4.405	0.05	4.40509	0.0500113	3.12934e-09	1570	83.1
1570	27	7.42971e-05	166.015	4.41	0.05	4.40982	0.0500039	3.03738e-09	1570	83.1
1570	27	7.45314e-05	166.188	4.415	0.05	4.41491	0.0499989	3.0556e-09	1570	83.1
1570	27	7.49499e-05	164.937	4.42	0.05	4.42002	0.0500152	3.09128e-09	1570	83.1
1570	27	7.92895e-05	165.723	4.425	0.05	4.42506	0.0500077	3.05979e-09	1570	83.1
1570	27	8.23369e-05	166.504	4.43	0.05	4.4298	0.0500114	3.11235e-09	1570	83.1
1570	27	9.02893e-05	166.637	4.435	0.05	4.43486	0.0500102	3.19903e-09	1570	83.1
1570	27	9.47817e-05	166.865	4.44	0.05	4.44015	0.05001	3.2311e-09	1570	83.1
1570	27	9.8885e-05	167.722	4.445	0.05	4.44514	0.0500075	3.25092e-09	1570	83.1
1570	27	0.000101487	167.436	4.45	0.05	4.44993	0.0500049	3.16567e-09	1570	83.1
1570	27	0.000101029	167.105	4.455	0.05	4.45498	0.0500006	3.05207e-09	1570	83.1
1570	27	9.6954e-05	167.917	4.46	0.05	4.46005	0.050005	3.08539e-09	1570	83.1
1570	27	9.45906e-05	167.19	4.465	0.05	4.46473	0.0500029	3.16889e-09	1570	83.1
1570	27	9.40933e-05	166.758	4.47	0.05	4.46982	0.0500076	3.20411e-09	1570	83.1
1570	27	9.26189e-05	166.891	4.475	0.05	4.475	0.0500137	3.17387e-09	1570	83.1
1570	27	8.46538e-05	166.927	4.48	0.05	4.48012	0.0500096	3.15816e-09	1570	83.1
1570	27	8.02931e-05	167.011	4.485	0.05	4.48488	0.0500085	2.97029e-09	1570	83.1
1570	27	7.62015e-05	165.778	4.49	0.05	4.48998	0.050013	3.03194e-09	1570	83.1
1570	27	7.56175e-05	166.323	4.495	0.05	4.4951	0.0500086	3.10131e-09	1570	83.1
1570	27	7.77166e-05	166.01	4.5	0.05	4.50013	0.0500052	2.99532e-09	1570	83.1
1570	27	7.83223e-05	166.079	4.505	0.05	4.50495	0.0499954	3.02397e-09	1570	83.1
1570	27	8.35919e-05	166.534	4.51	0.05	4.50994	0.0500045	3.06492e-09	1570	83.1
1570	27	9.08658e-05	167.046	4.515	0.05	4.51505	0.0500028	3.0875e-09	1570	83.1
1570	27	9.72128e-05	167.613	4.52	0.05	4.51988	0.0500041	3.1393e-09	1570	83.1
1570	27	0.000101116	167.03	4.525	0.05	4.52486	0.0500122	3.21898e-09	1570	83.1
1570	27	0.000102972	167.65	4.53	0.05	4.53001	0.050008	3.09142e-09	1570	83.1
1570	27	0.000100713	166.791	4.535	0.05	4.53511	0.0500116	3.20147e-09	1570	83.1
1570	27	0.000102546	167.128	4.54	0.05	4.5399	0.0500036	3.25505e-09	1570	83.1
1570	27	0.000105299	167.946	4.545	0.05	4.54496	0.0500098	3.07826e-09	1570	83.1
1570	28	0.000100707	167.668	4.55	0.05	4.55006	0.0500006	3.04995e-09	1570	83.1
1570	27	9.09449e-05	167.679	4.555	0.05	4.55507	0.0499996	3.15474e-09	1570	83.1
1570	27	7.8041e-05	166.3	4.56	0.05	4.55984	0.0500032	3.09014e-09	1570	83.1
1570	27	7.44313e-05	166.126	4.565	0.05	4.56492	0.0499946	3.04345e-09	1570	83.1
1570	27	7.19021e-05	166.9	4.57	0.05	4.57002	0.0500035	3.03385e-09	1570	83.1
1570	27	7.27441e-05	166.332	4.575	0.05	4.57487	0.0500095	2.95086e-09	1570	83.1
1570	27	7.20502e-05	166.565	4.58	0.05	4.57986	0.0500059	3.07959e-09	1570	83.1
1570	27	7.65271e-05	165.898	4.585	0.05	4.5849	0.0499939	2.97826e-09	1570	83.1
1570	27	8.0886e-05	165.838	4.59	0.05	4.59001	0.0499985	3.02078e-09	1570	83.1
1570	27	8.51001e-05	166.88	4.595	0.05	4.59489	0.0500019	2.97992e-09	1570	83.1
1570	27	9.12257e-05	167.04	4.6	0.05	4.59993	0.0500102	3.06168e-09	1570	83.1
1570	27	9.67492e-05	167.665	4.605	0.05	4.60507	0.0500124	3.15748e-09	1570	83.1
1570	27	0.00010394	167.508	4.61	0.05	4.60978	0.0500106	3.14215e-09	1570	83.1
1570	27	0.000105887	167.778	4.615	0.05	4.61492	0.0500155	3.09347e-09	1570	83.1
1570	27	0.000103336	167.2	4.62	0.05	4.61998	0.0500125	3.17639e-09	1570	83.1
1570	27	0.000100339	166.984	4.625	0.05	4.62506	0.0500075	3.14887e-09	1570	83.1
1570	27	9.83082e-05	167.339	4.63	0.05	4.62986	0.0500054	3.19651e-09	1570	83.1
1570	27	9.15022e-05	167.142	4.635	0.05	4.63483	0.0499976	2.9674e-09	1570	83.1
1570	27	8.35603e-05	166.66	4.64	0.05	4.64003	0.050007	3.00143e-09	1570	83.1
1570	27	7.65786e-05	166.515	4.645	0.05	4.64519	0.0500079	3.11286e-09	1570	83.1
1570	27	7.68874e-05	167.148	4.65	0.05	4.64986	0.050007	2.90122e-09	1570	83.1
1570	27	7.39468e-05	166.523	4.655	0.05	4.65503	0.0500084	2.96868e-09	1570	83.1
1570	27	7.36473e-05	166.14	4.66	0.05	4.66006	0.0500048	2.89731e-09	1570	83.1
1570	27	7.5957e-05	166.047	4.665	0.05	4.66478	0.0500057	3.12587e-09	1570	83.1
1570	27	8.34752e-05	166.786	4.67	0.05	4.6699	0.0500073	2.96446e-09	1570	83.1
1570	27	8.82974e-05	167.215	4.675	0.05	4.67497	0.0500095	2.94395e-09	1570	83.1
1570	27	9.26467e-05	167.065	4.68	0.05	4.68009	0.0500086	3.1228e-09	1570	83.1
1570	27	9.59245e-05	167.233	4.685	0.05	4.68485	0.0500132	3.02484e-09	1570	83.1
1570	27	9.98588e-05	167.371	4.69	0.05	4.68993	0.0500064	3.07644e-09	1570	83.1
1570	27	0.000100029	167.322	4.695	0.05	4.69505	0.0500137	3.07577e-09	1570	83.1
1570	27	0.000102429	167.193	4.7	0.05	4.70012	0.0500085	3.06739e-09	1570	83.1
1570	27	9.95287e-05	167.853	4.705	0.05	4.70485	0.0500018	3.02543e-09	1570	83.1
1570	27	9.34421e-05	167.581	4.71	0.05	4.70994	0.0500075	3.15973e-09	1570	83.1
1570	27	8.76955e-05	166.393	4.715	0.05	4.7151	0.0500092	2.97025e-09	1570	83.1
1570	27	8.0575e-05	166.666	4.72	0.05	4.71989	0.0500118	2.96029e-09	1570	83.1
1570	27	7.70215e-05	166.452	4.725	0.05	4.72486	0.0500125	2.93355e-09	1570	83.1
1570	27	7.35954e-05	166.482	4.73	0.05	4.73001	0.0500069	2.91305e-09	1570	83.1
1570	27	7.19656e-05	166.164	4.735	0.05	4.73508	0.0500076	3.08478e-09	1570	83.1
1570	27	7.18837e-05	166.34	4.74	0.05	4.73988	0.05001	3.10843e-09	1570	83.1
1570	27	7.63609e-05	166.416	4.745	0.05	4.74498	0.0500114	3.1008e-09	1570	83.1
1570	27	8.22848e-05	167.075	4.75	0.05	4.75009	0.0500136	3.12241e-09	1570	83.1
1570	27	8.93597e-05	166.853	4.755	0.05	4.75487	0.0500211	3.11426e-09	1570	83.1
1570	27	9.3799e-05	166.862	4.76	0.05	4.7599	0.0500105	3.16652e-09	1570	83.1
1570	27	9.95918e-05	167.997	4.765	0.05	4.76494	0.050016	3.17742e-09	1570	83.1
1570	27	0.000102495	167.666	4.77	0.05	4.77014	0.0500076	3.04221e-09	1570	83.1
1570	27	0.000104073	167.586	4.775	0.05	4.77487	0.0500047	3.08387e-09	1570	83.1
1570	27	0.000104203	167.527	4.78	0.05	4.77999	0.0500033	3.12571e-09	1570	83.1
1570	27	0.00010212	167.379	4.785	0.05	4.78509	0.0500022	3.02693e-09	1570	83.1
1570	28	9.43844e-05	166.814	4.79	0.05	4.79016	0.050004	3.07476e-09	1570	83.1
1570	27	8.60578e-05	166.796	4.795	0.05	4.79495	0.050005	3.16228e-09	1570	83.1
1570	27	7.93391e-05	166.34	4.8	0.05	4.8	0.0499991	3.09575e-09	1570	83.1
1570	27	7.57346e-05	166.284	4.805	0.05	4.80509	0.0500031	3.1247e-09	1570	83.1
1570	27	7.17664e-05	166.215	4.81	0.05	4.80982	0.0500104	2.93533e-09	1570	83.1
1570	27	7.12903e-05	166.017	4.815	0.05	4.81501	0.0500139	3.09498e-09	1570	83.1
1570	27	7.44336e-05	166.889	4.82	0.05	4.82005	0.0500138	2.94012e-09	1570	83.1
1570	27	7.91627e-05	165.934	4.825	0.05	4.82519	0.0500093	3.07772e-09	1570	83.1
1570	27	8.42823e-05	166.601	4.83	0.05	4.82994	0.0500107	2.96994e-09	1570	83.1
1570	27	8.76134e-05	166.883	4.835	0.05	4.83499	0.0500084	3.1553e-09	1570	83.1
1570	27	9.15985e-05	167.468	4.84	0.05	4.84003	0.0500089	3.17504e-09	1570	83.1
1570	27	9.69468e-05	166.263	4.845	0.05	4.84524	0.0500023	3.07317e-09	1570	83.1
1570	27	0.000101936	167.149	4.85	0.05	4.84995	0.0500051	3.18152e-09	1570	83.1
1570	27	0.000101175	167.14	4.855	0.05	4.85501	0.0500029	3.26702e-09	1570	83.1
1570	27	0.000101281	167.685	4.86	0.05	4.86009	0.0500066	3.18333e-09	1570	83.1
1570	27	9.52978e-05	167.227	4.865	0.05	4.86494	0.0500085	3.17409e-09	1570	83.1
1570	27	8.98003e-05	166.978	4.87	0.05	4.87002	0.0500102	3.16109e-09	1570	83.1
1570	27	8.92114e-05	166.888	4.875	0.05	4.87505	0.0500108	3.0857e-09	1570	83.1
1570	27	8.36433e-05	166.353	4.88	0.05	4.88013	0.0500068	2.9863e-09	1570	83.1
1570	28	7.62777e-05	166.431	4.885	0.05	4.88491	0.0499976	2.94301e-09	1570	83.1
1570	27	7.34388e-05	166.006	4.89	0.05	4.89004	0.0499973	2.97019e-09	1570	83.1
1570	27	7.26188e-05	165.792	4.895	0.05	4.89505	0.0500061	2.98746e-09	1570	83.1
1570	27	7.59722e-05	166.253	4.9	0.05	4.89989	0.0500082	3.07206e-09	1570	83.1
1570	27	8.02865e-05	166.856	4.905	0.05	4.90495	0.0500012	3.11157e-09	1570	83.1
1570	27	8.14153e-05	166.893	4.91	0.05	4.90999	0.0500073	3.13482e-09	1570	83.1
1570	27	8.84516e-05	167.09	4.915	0.05	4.91512	0.0500086	3.13848e-09	1570	83.1
1570	27	9.32448e-05	167.245	4.92	0.05	4.91984	0.0500067	3.16258e-09	1570	83.1
1570	27	9.77895e-05	167.55	4.925	0.05	4.92489	0.0500091	3.22719e-09	1570	83.1
1570	27	0.000101426	167.755	4.93	0.05	4.92993	0.0500091	3.19326e-09	1570	83.1
1570	28	0.000101606	167.315	4.935	0.05	4.93515	0.0500084	3.22507e-09	1570	83.1
1570	27	9.96657e-05	167.165	4.94	0.05	4.93993	0.0499947	3.18371e-09	1570	83.1
1570	27	9.62232e-05	167.345	4.945	0.05	4.94494	0.0500015	3.10138e-09	1570	83.1
1570	27	8.90915e-05	166.471	4.95	0.05	4.94997	0.0500048	3.09611e-09	1570	83.1
1570	27	8.62861e-05	166.611	4.955	0.05	4.95472	0.0500078	3.13879e-09	1570	83.1
1570	27	8.13055e-05	166.519	4.96	0.05	4.95984	0.050006	3.02966e-09	1570	83.1
1570	27	7.56911e-05	166.252	4.965	0.05	4.96495	0.0500011	3.08057e-09	1570	83.1
1570	27	7.2125e-05	166.799	4.97	0.05	4.97012	0.0500055	2.96944e-09	1570	83.1
1570	27	7.12674e-05	166.839	4.975	0.05	4.97492	0.0500108	3.03504e-09	1570	83.1
1570	27	7.35856e-05	166.437	4.98	0.05	4.97988	0.0500086	2.93599e-09	1570	83.1
1570	27	7.58902e-05	166.332	4.985	0.05	4.98501	0.0500115	3.00935e-09	1570	83.1
1570	27	8.36907e-05	166.088	4.99	0.05	4.99016	0.0500031	3.14224e-09	1570	83.1
1570	27	9.08063e-05	167.456	4.995	0.05	4.99492	0.0500025	3.05988e-09	1570	83.1
1570	27	9.59076e-05	167.637	5	0.05	4.99996	0.0500051	3.18252e-09	1570	83.1
1570	27	9.83015e-05	167.118	5.005	0.05	5.0051	0.0500076	3.12453e-09	1570	83.1
1570	27	0.000101925	167.436	5.01	0.05	5.00984	0.0500082	3.23232e-09	1570	83.1
1570	27	0.000104177	167.738	5.015	0.05	5.015	0.0500029	3.23161e-09	1570	83.1
1570	27	0.000102423	167.124	5.02	0.05	5.02	0.0500002	3.05478e-09	1570	83.1
1570	28	9.95114e-05	166.996	5.025	0.05	5.02511	0.0500067	3.07736e-09	1570	83.1
1570	27	9.62129e-05	166.925	5.03	0.05	5.0299	0.0500006	3.12832e-09	1570	83.1
1570	28	8.68162e-05	166.137	5.035	0.05	5.035	0.0500074	3.10399e-09	1570	83.1
1570	27	7.98588e-05	166.153	5.04	0.05	5.04008	0.0500033	2.97761e-09	1570	83.1
1570	27	7.51409e-05	166.393	5.045	0.05	5.04488	0.0500143	3.10228e-09	1570	83.1
1570	27	7.4687e-05	166.429	5.05	0.05	5.04999	0.0500102	3.01293e-09	1570	83.1
1570	27	7.1963e-05	165.926	5.055	0.05	5.05497	0.050011	2.931e-09	1570	83.1
1570	27	7.25524e-05	166.282	5.06	0.05	5.06003	0.050007	2.9197e-09	1570	83.1
1570	27	7.6552e-05	165.81	5.065	0.05	5.06488	0.0500051	2.9349e-09	1570	83.1
1570	27	7.95224e-05	166.024	5.07	0.05	5.06996	0.0499972	2.94861e-09	1570	83.1
1570	27	8.6336e-05	165.933	5.075	0.05	5.07506	0.050004	3.04807e-09	1570	83.1
1570	27	9.2325e-05	166.206	5.08	0.05	5.08005	0.0500057	3.08056e-09	1570	83.1
1570	27	9.79018e-05	167.159	5.085	0.05	5.08484	0.0500099	3.01549e-09	1570	83.1
1570	27	0.000100507	167.338	5.09	0.05	5.09004	0.05001	3.03241e-09	1570	83.1
1570	27	0.000106115	167.727	5.095	0.05	5.09501	0.0500119	3.02166e-09	1570	83.1
1570	27	0.000105559	167.64	5.1	0.05	5.09984	0.0500009	3.11957e-09	1570	83.1
1570	27	0.000104111	167.439	5.105	0.05	5.10496	0.0500051	3.06051e-09	1570	83.1
1570	27	9.82253e-05	166.596	5.11	0.05	5.11004	0.0500008	3.13987e-09	1570	83.1
1570	27	8.8087e-05	166.648	5.115	0.05	5.11508	0.0500044	2.96329e-09	1570	83.1
1570	27	8.44935e-05	166.286	5.12	0.05	5.11988	0.0500095	3.06679e-09	1570	83.1
1570	27	7.65439e-05	165.799	5.125	0.05	5.12499	0.0500138	3.05681e-09	1570	83.1
1570	27	7.61383e-05	166.405	5.13	0.05	5.13009	0.0500159	3.02928e-09	1570	83.1
1570	27	7.60758e-05	166.348	5.135	0.05	5.1351	0.0500063	3.06997e-09	1570	83.1
1570	27	7.38143e-05	165.606	5.14	0.05	5.13987	0.0500151	3.08788e-09	1570	83.1
1570	27	7.78311e-05	165.715	5.145	0.05	5.14496	0.050007	2.96028e-09	1570	83.1
1570	27	8.25726e-05	166.527	5.15	0.05	5.15011	0.0500094	3.10881e-09	1570	83.1
1570	27	8.7347e-05	166.887	5.155	0.05	5.15481	0.0500108	3.17281e-09	1570	83.1
1570	27	9.40337e-05	167.346	5.16	0.05	5.15988	0.0500113	2.98184e-09	1570	83.1
1570	27	9.88116e-05	167.396	5.165	0.05	5.16497	0.0500081	3.11117e-09	1570	83.1
1570	28	0.000101433	167.59	5.17	0.05	5.17012	0.0499996	3.13324e-09	1570	83.1
1570	27	0.000104178	167.766	5.175	0.05	5.17493	0.0500171	3.14952e-09	1570	83.1
1570	27	0.000101382	167.456	5.18	0.05	5.18001	0.0500085	3.07794e-09	1570	83.1
1570	27	0.000100247	167.354	5.185	0.05	5.18505	0.0500076	3.07627e-09	1570	83.1
1570	27	9.49083e-05	167.425	5.19	0.05	5.19018	0.050017	3.08574e-09	1570	83.1
1570	27	8.75895e-05	166.796	5.195	0.05	5.19498	0.0500051	3.13049e-09	1570	83.1
1570	27	8.02735e-05	166.041	5.2	0.05	5.20003	0.0500082	3.04081e-09	1570	83.1
1570	27	7.62504e-05	166.237	5.205	0.05	5.20513	0.050007	2.88968e-09	1570	83.1
1570	27	6.89655e-05	165.551	5.21	0.05	5.20988	0.050015	3.04485e-09	1570	83.1
1570	28	6.919e-05	166.281	5.215	0.05	5.2149	0.0500137	2.85865e-09	1570	83.1
1570	27	7.19173e-05	165.569	5.22	0.05	5.22004	0.0500134	3.01654e-09	1570	83.1
1570	27	7.8145e-05	166.281	5.225	0.05	5.22511	0.0500079	3.08263e-09	1570	83.1
1570	27	8.26209e-05	166.177	5.23	0.05	5.22988	0.0500081	3.09703e-09	1570	83.1
1570	27	8.66549e-05	166.641	5.235	0.05	5.23503	0.0500099	3.13954e-09	1570	83.1
1570	27	9.39369e-05	166.994	5.24	0.05	5.24003	0.0500063	3.10558e-09	1570	83.1
1570	27	9.85769e-05	167.256	5.245	0.05	5.24477	0.0500031	2.98233e-09	1570	83.1
1570	27	0.000103039	167.52	5.25	0.05	5.2499	0.0500034	2.99603e-09	1570	83.1
1570	27	0.000102794	167.309	5.255	0.05	5.25496	0.0500104	3.0464e-09	1570	83.1
1570	27	0.000103046	167.154	5.26	0.05	5.26005	0.0499971	3.16977e-09	1570	83.1
1570	28	0.00010134	167.42	5.265	0.05	5.26488	0.0500055	3.23337e-09	1570	83.1
1570	27	9.90735e-05	167.351	5.27	0.05	5.26987	0.0500048	3.09806e-09	1570	83.1
1570	27	8.85678e-05	166.383	5.275	0.05	5.27496	0.0500047	3.04687e-09	1570	83.1
1570	27	8.0645e-05	166.277	5.28	0.05	5.28008	0.0500019	2.9796e-09	1570	83.1
1570	27	7.48334e-05	166.206	5.285	0.05	5.28488	0.0500088	3.08958e-09	1570	83.1
1570	27	7.29606e-05	165.823	5.29	0.05	5.29	0.0500016	3.07285e-09	1570	83.1
1570	27	7.43234e-05	166.267	5.295	0.05	5.29507	0.0500075	2.90914e-09	1570	83.1
1570	27	7.53228e-05	165.913	5.3	0.05	5.29978	0.0499992	3.02254e-09	1570	83.1
1570	27	7.94306e-05	166.293	5.305	0.05	5.30491	0.0500108	3.03979e-09	1570	83.1
1570	27	8.5487e-05	166.512	5.31	0.05	5.31004	0.050003	3.10124e-09	1570	83.1
1570	27	9.14557e-05	166.822	5.315	0.05	5.31507	0.050008	3.14151e-09	1570	83.1
1570	27	9.6768e-05	167.226	5.32	0.05	5.31982	0.0500109	3.14054e-09	1570	83.1
1570	27	9.96038e-05	167.255	5.325	0.05	5.32488	0.0500055	3.05878e-09	1570	83.1
1570	27	0.000104785	167.761	5.33	0.05	5.33001	0.0500052	3.1957e-09	1570	83.1
1570	27	0.000106924	167.867	5.335	0.05	5.33507	0.0500099	3.21583e-09	1570	83.1
1570	27	0.000102732	167.674	5.34	0.05	5.33994	0.050012	3.20596e-09	1570	83.1
1570	27	9.62421e-05	167.329	5.345	0.05	5.34497	0.050004	3.11823e-09	1570	83.1
1570	27	9.07819e-05	167.246	5.35	0.05	5.35004	0.050005	3.04156e-09	1570	83.1
1570	27	8.58851e-05	166.971	5.355	0.05	5.35488	0.0500097	3.15307e-09	1570	83.1
1570	28	7.91312e-05	166.463	5.36	0.05	5.3599	0.0500017	3.01649e-09	1570	83.1
1570	28	7.33887e-05	166.389	5.365	0.05	5.36497	0.0500075	3.0495e-09	1570	83.1
1570	27	7.20665e-05	165.559	5.37	0.05	5.37006	0.0500013	3.03271e-09	1570	83.1
1570	27	7.20957e-05	165.935	5.375	0.05	5.37482	0.0500077	2.99577e-09	1570	83.1
1570	27	7.46191e-05	165.556	5.38	0.05	5.37994	0.0500037	3.08968e-09	1570	83.1
1570	27	7.7798e-05	165.635	5.385	0.05	5.38494	0.0500013	3.12142e-09	1570	83.1
1570	27	8.52634e-05	166.213	5.39	0.05	5.38971	0.0499995	3.16572e-09	1570	83.1
1570	27	9.16173e-05	166.796	5.395	0.05	5.39489	0.0500154	3.16619e-09	1570	83.1
1570	27	9.60737e-05	166.603	5.4	0.05	5.39994	0.0500059	3.02426e-09	1570	83.1
1570	27	0.000101621	167.582	5.405	0.05	5.40505	0.0499978	3.14803e-09	1570	83.1
1570	27	0.00010444	168.444	5.41	0.05	5.40982	0.0500043	3.22907e-09	1570	83.1
1570	27	0.000107292	167.785	5.415	0.05	5.41489	0.0500023	3.07825e-09	1570	83.1
1570	27	0.000106416	167.432	5.42	0.05	5.41997	0.0499973	3.10864e-09	1570	83.1
1570	27	0.000100531	167.952	5.425	0.05	5.42509	0.0500089	3.18594e-09	1570	83.1
1570	27	8.90856e-05	167.075	5.43	0.05	5.42983	0.0500057	3.17313e-09	1570	83.1
1570	27	8.65184e-05	167.249	5.435	0.05	5.43495	0.0500112	3.01483e-09	1570	83.1
1570	27	8.63162e-05	166.515	5.44	0.05	5.44001	0.0500061	3.17521e-09	1570	83.1
1570	27	8.0566e-05	165.89	5.445	0.05	5.44481	0.0500116	2.99105e-09	1570	83.1
1570	27	7.38917e-05	166.139	5.45	0.05	5.44991	0.0500103	3.06805e-09	1570	83.1
1570	27	7.20909e-05	166.186	5.455	0.05	5.45495	0.0500065	2.93186e-09	1570	83.1
1570	27	7.68766e-05	166.316	5.46	0.05	5.46003	0.0500098	3.05959e-09	1570	83.1
1570	27	8.04271e-05	165.867	5.465	0.05	5.46497	0.0500113	3.04168e-09	1570	83.1
1570	27	8.37879e-05	166.596	5.47	0.05	5.46998	0.0500169	2.98056e-09	1570	83.1
1570	27	8.84909e-05	166.902	5.475	0.05	5.47506	0.0500051	3.01867e-09	1570	83.1
1570	27	9.55008e-05	167.042	5.48	0.05	5.48009	0.0500091	3.03779e-09	1570	83.1
1570	27	0.000100543	167.097	5.485	0.05	5.48484	0.050006	3.11355e-09	1570	83.1
1570	27	0.000102747	167.585	5.49	0.05	5.48992	0.0500126	3.10796e-09	1570	83.1
1570	27	0.000101875	167.308	5.495	0.05	5.49502	0.0500127	3.11662e-09	1570	83.1
1570	27	0.000100542	167.968	5.5	0.05	5.49982	0.0500059	3.13374e-09	1570	83.1
1570	27	9.88639e-05	167.242	5.505	0.05	5.5049	0.0500105	3.00165e-09	1570	83.1
1570	27	9.43003e-05	166.679	5.51	0.05	5.50997	0.0500041	3.04833e-09	1570	83.1
1570	27	8.74394e-05	166.416	5.515	0.05	5.51509	0.0500015	3.08058e-09	1570	83.1
1570	27	8.12187e-05	166.348	5.52	0.05	5.51991	0.0500059	2.9257e-09	1570	83.1
1570	27	7.63437e-05	166.204	5.525	0.05	5.52498	0.0500065	2.88555e-09	1570	83.1
1570	27	7.14626e-05	165.875	5.53	0.05	5.53012	0.0500103	3.05282e-09	1570	83.1
1570	27	7.19961e-05	165.483	5.535	0.05	5.53481	0.0500079	2.84834e-09	1570	83.1
1570	27	7.47398e-05	165.522	5.54	0.05	5.53986	0.0500076	3.06009e-09	1570	83.1
1570	27	7.716e-05	165.672	5.545	0.05	5.54489	0.0500096	2.94084e-09	1570	83.1
1570	27	8.1983e-05	166.437	5.55	0.05	5.55007	0.0500072	3.08066e-09	1570	83.1
1570	27	8.66601e-05	166.859	5.555	0.05	5.55482	0.0500064	2.95705e-09	1570	83.1
1570	27	9.27017e-05	166.921	5.56	0.05	5.55992	0.0500148	3.15055e-09	1570	83.1
1570	27	9.87359e-05	167.589	5.565	0.05	5.56494	0.0499998	2.9652e-09	1570	83.1
1570	27	0.000100004	167.248	5.57	0.05	5.57007	0.0499977	3.14914e-09	1570	83.1
1570	27	0.000102784	167.814	5.575	0.05	5.57492	0.0500091	3.03179e-09	1570	83.1
1570	27	0.000103959	167.432	5.58	0.05	5.57997	0.0500056	3.18564e-09	1570	83.1
1570	27	0.000102748	167.238	5.585	0.05	5.58507	0.050004	3.13507e-09	1570	83.1
1570	27	0.000101011	167.678	5.59	0.05	5.58987	0.0499999	3.09935e-09	1570	83.1
1570	27	9.52388e-05	167.44	5.595	0.05	5.59488	0.0499976	3.15768e-09	1570	83.1
1570	27	8.56856e-05	166.214	5.6	0.05	5.59997	0.0499919	2.97068e-09	1570	83.1
1570	27	8.05203e-05	166.149	5.605	0.05	5.60506	0.0499925	2.97715e-09	1570	83.1
1570	27	7.62332e-05	166.017	5.61	0.05	5.60987	0.0500083	3.01377e-09	1570	83.1
1570	27	7.38715e-05	165.953	5.615	0.05	5.6149	0.0500153	2.86485e-09	1570	83.1
1570	27	7.40168e-05	166.558	5.62	0.05	5.62001	0.050005	2.88268e-09	1570	83.1
1570	27	7.55936e-05	166.581	5.625	0.05	5.62512	0.0500045	2.95152e-09	1570	83.1
1570	27	8.04697e-05	166.453	5.63	0.05	5.62981	0.0500048	2.92951e-09	1570	83.1
1570	27	8.53155e-05	167.27	5.635	0.05	5.63498	0.0500098	3.04973e-09	1570	83.1
1570	27	9.41539e-05	167.139	5.64	0.05	5.64012	0.0500086	2.99279e-09	1570	83.1
1570	27	9.89616e-05	167.639	5.645	0.05	5.64477	0.0500105	2.95877e-09	1570	83.1
1570	27	9.95548e-05	167.694	5.65	0.05	5.64985	0.0500149	3.14933e-09	1570	83.1
1570	27	0.000102836	168.224	5.655	0.05	5.65503	0.0500008	3.03459e-09	1570	83.1
1570	27	0.000104157	167.598	5.66	0.05	5.66005	0.0500083	3.07493e-09	1570	83.1
1570	27	0.000104379	167.479	5.665	0.05	5.66485	0.0500095	3.10532e-09	1570	83.1
1570	27	9.86886e-05	167.192	5.67	0.05	5.66989	0.0500161	3.06763e-09	1570	83.1
1570	27	9.39554e-05	166.668	5.675	0.05	5.67502	0.0500019	3.04712e-09	1570	83.1
1570	27	8.75117e-05	166.539	5.68	0.05	5.68012	0.0500068	3.13696e-09	1570	83.1
1570	27	8.13925e-05	166.136	5.685	0.05	5.6849	0.0500049	3.12353e-09	1570	83.1
1570	27	7.4093e-05	166.335	5.69	0.05	5.68996	0.0500092	2.93391e-09	1570	83.1
1570	27	7.24019e-05	166.057	5.695	0.05	5.69507	0.0500079	2.92854e-09	1570	83.1
1570	27	7.35205e-05	166.907	5.7	0.05	5.69992	0.0500072	3.0737e-09	1570	83.1
1570	28	7.58936e-05	166.238	5.705	0.05	5.70498	0.0500066	2.98268e-09	1570	83.1
1570	27	8.12256e-05	166.276	5.71	0.05	5.71008	0.0500026	2.97114e-09	1570	83.1
1570	27	8.987e-05	167.378	5.715	0.05	5.7152	0.050007	3.11361e-09	1570	83.1
1570	27	9.69212e-05	167.15	5.72	0.05	5.71989	0.0500091	3.20398e-09	1570	83.1
1570	27	9.99652e-05	167.48	5.725	0.05	5.72502	0.0500065	3.18002e-09	1570	83.1
1570	27	0.000102483	167.882	5.73	0.05	5.73006	0.0500055	3.16963e-09	1570	83.1
1570	27	0.000102016	167.596	5.735	0.05	5.73485	0.0499983	3.05853e-09	1570	83.1
1570	27	0.000101403	167.656	5.74	0.05	5.73996	0.0500031	3.08936e-09	1570	83.1
1570	27	9.48793e-05	166.394	5.745	0.05	5.74507	0.0500088	3.16096e-09	1570	83.1
1570	27	9.43173e-05	166.803	5.75	0.05	5.75015	0.0500154	3.18146e-09	1570	83.1
1570	27	8.9327e-05	166.187	5.755	0.05	5.75489	0.0500095	3.15403e-09	1570	83.1
1570	27	8.50743e-05	166.41	5.76	0.05	5.75994	0.0500047	3.08586e-09	1570	83.1
1570	27	8.05674e-05	166.371	5.765	0.05	5.76501	0.0500171	3.04213e-09	1570	83.1
1570	27	7.64823e-05	166.268	5.77	0.05	5.77015	0.0500085	3.10115e-09	1570	83.1
1570	27	7.35533e-05	165.964	5.775	0.05	5.77488	0.050009	2.97184e-09	1570	83.1
1570	27	7.58274e-05	165.455	5.78	0.05	5.78001	0.0500105	3.01931e-09	1570	83.1
1570	27	7.96984e-05	166.735	5.785	0.05	5.78511	0.0500066	3.13073e-09	1570	83.1
1570	27	8.53012e-05	167.05	5.79	0.05	5.78989	0.0500019	3.0113e-09	1570	83.1
1570	27	9.00196e-05	167.882	5.795	0.05	5.79501	0.0500037	3.16122e-09	1570	83.1
1570	27	9.31293e-05	166.796	5.8	0.05	5.80009	0.050005	3.21638e-09	1570	83.1
1570	27	9.94335e-05	167.309	5.805	0.05	5.80511	0.0500078	3.1358e-09	1570	83.1
1570	27	0.000101719	167.485	5.81	0.05	5.80994	0.0500045	3.0989e-09	1570	83.1
1570	27	0.000105288	167.124	5.815	0.05	5.815	0.0500033	3.28568e-09	1570	83.1
1570	27	0.000104204	167.861	5.82	0.05	5.82012	0.0500006	3.25245e-09	1570	83.1
1570	27	0.000104351	166.933	5.825	0.05	5.82516	0.0500068	3.13015e-09	1570	83.1
1570	27	9.83661e-05	167.194	5.83	0.05	5.82992	0.0500086	3.18793e-09	1570	83.1
1570	27	9.28653e-05	166.565	5.835	0.05	5.83504	0.0499999	3.18619e-09	1570	83.1
1570	27	8.58178e-05	166.881	5.84	0.05	5.84013	0.0499949	3.00216e-09	1570	83.1
1570	27	8.31576e-05	165.913	5.845	0.05	5.84487	0.0500073	3.12694e-09	1570	83.1
1570	27	8.21544e-05	166.762	5.85	0.05	5.84994	0.0500037	3.14141e-09	1570	83.1
1570	27	7.70292e-05	166.282	5.855	0.05	5.85498	0.0500002	2.98207e-09	1570	83.1
1570	27	7.61592e-05	166.25	5.86	0.05	5.86015	0.0499986	3.13952e-09	1570	83.1
1570	27	7.94259e-05	165.632	5.865	0.05	5.86495	0.0500052	3.09273e-09	1570	83.1
1570	27	8.4919e-05	166.664	5.87	0.05	5.86995	0.0500098	3.06946e-09	1570	83.1
1570	27	9.18745e-05	167.101	5.875	0.05	5.87507	0.0500058	3.04124e-09	1570	83.1
1570	27	9.67991e-05	167.158	5.88	0.05	5.87992	0.0500047	3.00206e-09	1570	83.1
1570	27	9.97602e-05	167.196	5.885	0.05	5.88504	0.0500129	3.02616e-09	1570	83.1
1570	27	0.000101286	167.606	5.89	0.05	5.89007	0.0500043	3.12916e-09	1570	83.1
1570	27	0.000103846	167.386	5.895	0.05	5.89511	0.050006	3.22852e-09	1570	83.1
1570	27	0.000102401	167.431	5.9	0.05	5.89993	0.0500011	3.09926e-09	1570	83.1
1570	27	9.95984e-05	167.173	5.905	0.05	5.90497	0.0500087	3.15477e-09	1570	83.1
1570	27	9.45472e-05	166.734	5.91	0.05	5.91013	0.0500048	3.04852e-09	1570	83.1
1570	27	8.66707e-05	166.541	5.915	0.05	5.91513	0.0500038	3.07466e-09	1570	83.1
1570	27	8.2674e-05	165.985	5.92	0.05	5.9199	0.0500052	3.07302e-09	1570	83.1
1570	27	7.99687e-05	166.898	5.925	0.05	5.92504	0.0500004	3.06974e-09	1570	83.1
1570	27	7.47312e-05	165.878	5.93	0.05	5.93016	0.0500046	3.03282e-09	1570	83.1
1570	27	7.20615e-05	166.389	5.935	0.05	5.93485	0.0500062	2.93742e-09	1570	83.1
1570	27	7.31495e-05	165.652	5.94	0.05	5.94	0.0500099	2.96707e-09	1570	83.1
1570	28	7.51648e-05	165.912	5.945	0.05	5.94504	0.0500124	2.83445e-09	1570	83.1
1570	27	8.01272e-05	167.33	5.95	0.05	5.95009	0.0500083	3.01166e-09	1570	83.1
1570	27	8.66783e-05	166.298	5.955	0.05	5.95483	0.0500046	2.91746e-09	1570	83.1
1570	27	9.18669e-05	166.987	5.96	0.05	5.96002	0.0500118	2.95254e-09	1570	83.1
1570	27	9.72508e-05	167.156	5.965	0.05	5.96501	0.0500069	3.06377e-09	1570	83.1
1570	27	0.000103424	167.606	5.97	0.05	5.97014	0.0500159	3.04933e-09	1570	83.1
1570	27	0.000103051	167.806	5.975	0.05	5.97491	0.0500043	3.10998e-09	1570	83.1
1570	27	0.000103304	167.53	5.98	0.05	5.98005	0.0500031	3.05075e-09	1570	83.1
1570	27	9.90867e-05	167.589	5.985	0.05	5.98513	0.0500014	3.13481e-09	1570	83.1
1570	27	9.65647e-05	166.814	5.99	0.05	5.98985	0.0500056	3.0097e-09	1570	83.1
1570	28	8.89234e-05	166.743	5.995	0.05	5.99491	0.0500044	2.9833e-09	1570	83.1
1570	27	8.2974e-05	166.028	6	0.05	6.00002	0.0500026	3.09063e-09	1570	83.1
1570	27	7.71643e-05	166.102	6.005	0.05	6.0051	0.0500075	3.03959e-09	1570	83.1
1570	27	7.25406e-05	165.727	6.01	0.05	6.00986	0.0500074	2.85751e-09	1570	83.1
1570	27	7.09865e-05	165.449	6.015	0.05	6.015	0.050006	2.90848e-09	1570	83.1
1570	27	7.18439e-05	165.503	6.02	0.05	6.02023	0.0500057	2.86812e-09	1570	83.1
1570	27	7.52188e-05	165.959	6.025	0.05	6.02489	0.0500083	3.0699e-09	1570	83.1
1570	27	7.87344e-05	165.568	6.03	0.05	6.03005	0.0499994	2.89325e-09	1570	83.1
1570	27	8.3871e-05	166.462	6.035	0.05	6.03508	0.0500131	3.04819e-09	1570	83.1
1570	27	8.99554e-05	167.131	6.04	0.05	6.04014	0.0500104	3.01776e-09	1570	83.1
1570	27	9.75211e-05	167.118	6.045	0.05	6.04493	0.0500122	2.99512e-09	1570	83.1
1570	27	9.94463e-05	166.865	6.05	0.05	6.04999	0.0500057	3.1906e-09	1570	83.1
1570	27	0.000100227	167.365	6.055	0.05	6.0551	0.0500089	3.00244e-09	1570	83.1
1570	27	0.000101636	167.153	6.06	0.05	6.06013	0.0500009	3.12165e-09	1570	83.1
1570	27	9.81715e-05	167.459	6.065	0.05	6.06492	0.0500137	3.04027e-09	1570	83.1
1570	27	0.000100832	167.209	6.07	0.05	6.07001	0.0500047	2.99402e-09	1570	83.1
1570	27	9.63161e-05	166.93	6.075	0.05	6.07509	0.0500107	3.13048e-09	1570	83.1
1570	27	9.2171e-05	167.125	6.08	0.05	6.07989	0.0500077	3.03651e-09	1570	83.1
1570	27	7.71313e-05	165.747	6.085	0.05	6.08499	0.0500051	2.8757e-09	1570	83.1
1570	27	7.13103e-05	165.664	6.09	0.05	6.09008	0.0500103	2.98688e-09	1570	83.1
1570	27	7.01354e-05	166.089	6.095	0.05	6.09514	0.0500118	3.04976e-09	1570	83.1
1570	27	7.111e-05	165.497	6.1	0.05	6.09996	0.0500115	3.04206e-09	1570	83.1
1570	27	7.45621e-05	165.66	6.105	0.05	6.10499	0.0500123	2.94904e-09	1570	83.1
1570	27	7.87245e-05	166.252	6.11	0.05	6.11012	0.0500193	3.06637e-09	1570	83.1
1570	27	8.33025e-05	166.514	6.115	0.05	6.11528	0.0500112	3.12484e-09	1570	83.1
1570	27	9.05792e-05	167.175	6.12	0.05	6.11998	0.0500076	2.95325e-09	1570	83.1
1570	27	9.64477e-05	167.081	6.125	0.05	6.1251	0.0500035	3.15282e-09	1570	83.1
1570	27	0.000100994	167.726	6.13	0.05	6.13019	0.0500055	3.1889e-09	1570	83.1
1570	27	9.97085e-05	167.231	6.135	0.05	6.1349	0.0500155	3.01375e-09	1570	83.1
1570	28	9.87726e-05	166.897	6.14	0.05	6.14004	0.0500081	3.11116e-09	1570	83.1
1570	27	9.68285e-05	167.017	6.145	0.05	6.14515	0.0500078	3.15928e-09	1570	83.1
1570	27	9.559e-05	166.85	6.15	0.05	6.15017	0.0500085	3.01619e-09	1570	83.1
1570	27	9.13262e-05	166.727	6.155	0.05	6.15502	0.0500157	3.10472e-09	1570	83.1
1570	27	8.58667e-05	166.446	6.16	0.05	6.16012	0.0500154	3.12221e-09	1570	83.1
1570	27	8.00371e-05	166.216	6.165	0.05	6.16518	0.0500135	3.04691e-09	1570	83.1
1570	27	7.72682e-05	166.461	6.17	0.05	6.17025	0.0500149	2.97301e-09	1570	83.1
1570	27	7.56465e-05	166.636	6.175	0.05	6.17499	0.0500037	2.987e-09	1570	83.1
1570	27	7.4637e-05	166.111	6.18	0.05	6.18007	0.050003	2.94505e-09	1570	83.1
1570	27	7.61745e-05	165.802	6.185	0.05	6.18514	0.0500028	3.04543e-09	1570	83.1
1570	27	8.38416e-05	166.896	6.19	0.05	6.18992	0.0500081	2.98319e-09	1570	83.1
1570	27	8.78125e-05	167.184	6.195	0.05	6.19495	0.0500044	3.01916e-09	1570	83.1
1570	27	9.06729e-05	166.694	6.2	0.05	6.20006	0.0500026	3.12298e-09	1570	83.1
1570	27	9.35168e-05	167.116	6.205	0.05	6.20514	0.0500044	3.17679e-09	1570	83.1
1570	27	9.90789e-05	168.058	6.21	0.05	6.20985	0.0500049	3.0403e-09	1570	83.1
1570	27	0.000101776	167.429	6.215	0.05	6.21499	0.0500079	3.11608e-09	1570	83.1
1570	27	0.00010187	167.881	6.22	0.05	6.22005	0.0500026	3.22791e-09	1570	83.1
1570	27	0.000101797	167.658	6.225	0.05	6.22488	0.0500006	3.18011e-09	1570	83.1
1570	28	9.55045e-05	167.643	6.23	0.05	6.22996	0.0500074	3.20132e-09	1570	83.1
1570	27	9.18116e-05	166.839	6.235	0.05	6.23499	0.050007	2.99378e-09	1570	83.1
1570	27	8.5425e-05	166.199	6.24	0.05	6.24018	0.0499952	2.99721e-09	1570	83.1
1570	27	7.90561e-05	166.222	6.245	0.05	6.24493	0.0500008	2.94531e-09	1570	83.1
1570	27	7.37395e-05	166.506	6.25	0.05	6.25003	0.0500066	3.06164e-09	1570	83.1
1570	27	7.263e-05	165.714	6.255	0.05	6.25512	0.0500036	3.101e-09	1570	83.1
1570	27	7.23562e-05	166.399	6.26	0.05	6.26016	0.0500027	2.90462e-09	1570	83.1
1570	27	7.40538e-05	165.709	6.265	0.05	6.26495	0.0500065	3.0017e-09	1570	83.1
1570	27	7.95381e-05	166.104	6.27	0.05	6.27013	0.0500093	3.13618e-09	1570	83.1
1570	27	8.485e-05	166.882	6.275	0.05	6.27519	0.0500062	3.08177e-09	1570	83.1
1570	27	9.07252e-05	167.262	6.28	0.05	6.27991	0.0500047	2.98903e-09	1570	83.1
1570	28	9.57244e-05	167.302	6.285	0.05	6.28503	0.0500083	3.10126e-09	1570	83.1
1570	27	0.000100607	167.885	6.29	0.05	6.29005	0.050005	3.24566e-09	1570	83.1
1570	27	0.000102588	168.065	6.295	0.05	6.29525	0.0500042	3.14779e-09	1570	83.1
1570	27	0.000102183	167.812	6.3	0.05	6.29995	0.0500014	3.25093e-09	1570	83.1
1570	27	0.000101921	167.601	6.305	0.05	6.30499	0.0500021	3.27105e-09	1570	83.1
1570	27	9.91574e-05	167.72	6.31	0.05	6.31009	0.0500101	3.09315e-09	1570	83.1
1570	27	8.84706e-05	167.285	6.315	0.05	6.31516	0.0500068	3.03611e-09	1570	83.1
1570	27	7.89387e-05	166.405	6.32	0.05	6.31999	0.0500113	3.04775e-09	1570	83.1
1570	27	7.52482e-05	166.643	6.325	0.05	6.32504	0.0500114	3.00508e-09	1570	83.1
1570	27	7.71351e-05	166.62	6.33	0.05	6.33014	0.0500091	3.03519e-09	1570	83.1
1570	27	7.45606e-05	165.756	6.335	0.05	6.33487	0.0500083	3.10144e-09	1570	83.1
1570	27	7.28415e-05	166.501	6.34	0.05	6.34004	0.0500014	3.10383e-09	1570	83.1
1570	27	7.43542e-05	166.028	6.345	0.05	6.34512	0.0500056	3.01276e-09	1570	83.1
1570	27	7.79606e-05	165.676	6.35	0.05	6.35022	0.050014	3.11468e-09	1570	83.1
1570	27	8.43377e-05	166.554	6.355	0.05	6.35505	0.0500114	2.98981e-09	1570	83.1
1570	27	8.89405e-05	166.861	6.36	0.05	6.36009	0.0500068	3.15725e-09	1570	83.1
1570	27	9.45159e-05	167.41	6.365	0.05	6.36517	0.050004	3.17711e-09	1570	83.1
1570	27	9.94675e-05	167.341	6.37	0.05	6.36994	0.0500147	3.17076e-09	1570	83.1
1570	27	0.000103003	167.445	6.375	0.05	6.37499	0.0500074	3.05123e-09	1570	83.1
1570	27	0.000104054	167.477	6.38	0.05	6.38005	0.0500155	3.12262e-09	1570	83.1
1570	27	0.000104187	167.249	6.385	0.05	6.38513	0.0500057	3.16466e-09	1570	83.1
1570	27	0.000101869	167.596	6.39	0.05	6.38998	0.0500131	3.18726e-09	1570	83.1
1570	27	0.000101756	167.483	6.395	0.05	6.395	0.0500128	3.09964e-09	1570	83.1
1570	27	9.55965e-05	166.756	6.4	0.05	6.40011	0.0499977	3.04999e-09	1570	83.1
1570	27	8.91817e-05	166.785	6.405	0.05	6.40527	0.0499976	3.06314e-09	1570	83.1
1570	27	7.88018e-05	166.194	6.41	0.05	6.41004	0.0499944	2.91458e-09	1570	83.1
1570	27	7.11612e-05	166.155	6.415	0.05	6.41516	0.0500068	2.94614e-09	1570	83.1
1570	27	6.9867e-05	165.948	6.42	0.05	6.42016	0.0499982	2.89364e-09	1570	83.1
1570	27	7.26167e-05	165.716	6.425	0.05	6.42498	0.0500086	2.90887e-09	1570	83.1
1570	27	7.74411e-05	166.217	6.43	0.05	6.4301	0.0500122	2.90018e-09	1570	83.1
1570	27	8.06437e-05	165.908	6.435	0.05	6.43512	0.0500078	3.0913e-09	1570	83.1
1570	27	8.65433e-05	167.11	6.44	0.05	6.44013	0.0500076	3.14615e-09	1570	83.1
1570	27	9.30496e-05	167.396	6.445	0.05	6.44499	0.0500097	3.13221e-09	1570	83.1
1570	27	9.71767e-05	167.139	6.45	0.05	6.45013	0.0500049	3.02692e-09	1570	83.1
1570	27	0.000101179	166.943	6.455	0.05	6.4552	0.0499966	3.09952e-09	1570	83.1
1570	27	0.000102063	167.573	6.46	0.05	6.46027	0.0500106	3.0065e-09	1570	83.1
1570	27	9.98456e-05	166.869	6.465	0.05	6.46505	0.0499985	3.14532e-09	1570	83.1
1570	27	9.64838e-05	166.993	6.47	0.05	6.47007	0.0500026	2.95899e-09	1570	83.1
1570	27	9.15957e-05	167.112	6.475	0.05	6.47522	0.050011	2.9783e-09	1570	83.1
1570	27	8.77925e-05	166.641	6.48	0.05	6.48	0.0500097	3.03688e-09	1570	83.1
1570	27	8.03852e-05	166.43	6.485	0.05	6.48514	0.0500034	2.90174e-09	1570	83.1
1570	27	7.02177e-05	165.685	6.49	0.05	6.49018	0.0500061	3.01366e-09	1570	83.1
1570	27	6.8066e-05	166.265	6.495	0.05	6.49523	0.0500095	2.93589e-09	1570	83.1
1570	27	6.89429e-05	165.677	6.5	0.05	6.5	0.0500011	3.0211e-09	1570	83.1
1570	27	7.22499e-05	166.394	6.505	0.05	6.50505	0.050016	2.96311e-09	1570	83.1
1570	27	7.71644e-05	165.616	6.51	0.05	6.51012	0.0500085	3.08135e-09	1570	83.1
1570	27	8.27043e-05	166.98	6.515	0.05	6.51488	0.0500045	2.95644e-09	1570	83.1
1570	27	8.5858e-05	166.778	6.52	0.05	6.51993	0.0500045	2.9668e-09	1570	83.1
1570	27	9.08209e-05	167.118	6.525	0.05	6.525	0.0499997	3.00818e-09	1569.9	83.1
1570	28	9.47967e-05	167.035	6.53	0.05	6.5301	0.0500157	3.01477e-09	1570	83.1
1570	28	0.00010063	167.66	6.535	0.05	6.53479	0.0500115	3.01961e-09	1570	83.1
1570	27	0.000103572	167.714	6.54	0.05	6.54	0.0500099	3.04839e-09	1570	83.1
1570	27	0.00010289	167.223	6.545	0.05	6.54509	0.0500055	3.03704e-09	1570	83.1
1570	27	9.87539e-05	167.251	6.55	0.05	6.55013	0.050007	3.22678e-09	1570	83.1
1570	27	9.46578e-05	167.182	6.555	0.05	6.5549	0.0500101	3.0672e-09	1570	83.1
1570	27	8.83641e-05	166.839	6.56	0.05	6.56008	0.0500124	2.95424e-09	1570	83.1
1570	27	7.76201e-05	166.257	6.565	0.05	6.56515	0.0500103	3.10799e-09	1570	83.1
1570	27	7.54086e-05	166.355	6.57	0.05	6.56997	0.0500145	2.98828e-09	1570	83.1
1570	27	7.26754e-05	165.801	6.575	0.05	6.57495	0.0500079	2.89834e-09	1570	83.1
1570	28	7.05023e-05	165.246	6.58	0.05	6.58007	0.0500084	2.99786e-09	1570	83.1
1570	27	7.30053e-05	165.633	6.585	0.05	6.58508	0.0500051	2.93383e-09	1570	83.1
1570	27	7.61324e-05	165.328	6.59	0.05	6.5899	0.0500071	2.98278e-09	1570	83.1
1570	27	8.06931e-05	166.873	6.595	0.05	6.59497	0.0500116	3.00913e-09	1570	83.1
1570	27	8.48855e-05	167.482	6.6	0.05	6.60011	0.050003	3.07681e-09	1570	83.1
1570	27	9.56576e-05	167.681	6.605	0.05	6.60517	0.0500087	3.05277e-09	1570	83.1
1570	27	9.99581e-05	167.524	6.61	0.05	6.60996	0.0500042	3.1272e-09	1570	83.1
1570	27	0.00010227	167.084	6.615	0.05	6.61502	0.0500128	3.06126e-09	1570	83.1
1570	27	0.000102391	167.507	6.62	0.05	6.62019	0.0500075	3.05058e-09	1570	83.1
1570	27	0.000102205	167.25	6.625	0.05	6.6249	0.0500009	3.04236e-09	1570	83.1
1570	27	0.000101513	167.253	6.63	0.05	6.63004	0.0500047	3.18946e-09	1570	83.1
1570	27	9.47033e-05	167.031	6.635	0.05	6.63511	0.0500146	3.02327e-09	1570	83.1
1570	27	8.82121e-05	166.597	6.64	0.05	6.6402	0.050016	3.15333e-09	1570	83.1
1570	27	8.24433e-05	166.268	6.645	0.05	6.64492	0.0500151	2.95356e-09	1570	83.1
1570	27	7.61335e-05	166.891	6.65	0.05	6.65003	0.0500058	2.96253e-09	1570	83.1
1570	27	7.32318e-05	165.738	6.655	0.05	6.65512	0.0500064	3.10507e-09	1570	83.1
1570	27	7.40404e-05	165.955	6.66	0.05	6.66012	0.0500004	2.94459e-09	1570	83.1
1570	27	7.58122e-05	166.865	6.665	0.05	6.66498	0.0500035	3.03184e-09	1570	83.1
1570	27	7.74328e-05	166.194	6.67	0.05	6.67004	0.0500084	3.02817e-09	1570	83.1
1570	27	8.35984e-05	166.327	6.675	0.05	6.67514	0.0500048	3.08746e-09	1570	83.1
1570	27	9.00534e-05	166.99	6.68	0.05	6.67997	0.0499949	3.02639e-09	1570	83.1
1570	27	9.44957e-05	167.145	6.685	0.05	6.68501	0.0500057	3.04599e-09	1570	83.1
1570	27	0.000101397	167.362	6.69	0.05	6.69009	0.0500026	3.11884e-09	1570	83.1
1570	27	0.000103259	167.799	6.695	0.05	6.69521	0.0499989	3.15907e-09	1570	83.1
1570	27	0.00010251	167.162	6.7	0.05	6.69989	0.0500028	3.19957e-09	1570	83.1
1570	27	0.000101079	167.364	6.705	0.05	6.70511	0.0500016	3.18485e-09	1570	83.1
1570	27	9.5449e-05	166.818	6.71	0.05	6.71019	0.0500103	3.05843e-09	1570	83.1
1570	27	8.81789e-05	166.901	6.715	0.05	6.71493	0.0500116	3.00906e-09	1570	83.1
1570	27	8.65673e-05	166.861	6.72	0.05	6.71995	0.0500161	2.99428e-09	1570	83.1
1570	27	7.98746e-05	166.274	6.725	0.05	6.72511	0.05001	3.036e-09	1570	83.1
1570	27	7.49427e-05	166.377	6.73	0.05	6.73021	0.050006	3.08728e-09	1570	83.1
1570	27	7.37756e-05	165.944	6.735	0.05	6.73502	0.0500052	2.95824e-09	1570	83.1
1570	27	7.33615e-05	165.692	6.74	0.05	6.74007	0.0500093	2.94742e-09	1570	83.1
1570	27	7.52886e-05	165.82	6.745	0.05	6.74512	0.0500072	2.94283e-09	1570	83.1
1570	27	7.91368e-05	165.166	6.75	0.05	6.75025	0.0500024	3.10948e-09	1570	83.1
1570	27	8.6867e-05	166.398	6.755	0.05	6.75499	0.0500096	3.02564e-09	1570	83.1
1570	27	9.05717e-05	166.85	6.76	0.05	6.76011	0.0500063	3.12344e-09	1570	83.1
1570	27	9.75207e-05	166.76	6.765	0.05	6.7651	0.050009	3.18387e-09	1570	83.1
1570	27	0.000103174	167.704	6.77	0.05	6.76988	0.0499975	3.18821e-09	1570	83.1
1570	27	0.000105759	168.196	6.775	0.05	6.775	0.0500046	3.31983e-09	1570	83.1
1570	27	0.000105132	167.749	6.78	0.05	6.78009	0.0500028	3.24678e-09	1570	83.1
1570	27	0.000101687	167.168	6.785	0.05	6.78523	0.0500046	3.30319e-09	1570	83.1
1570	27	9.96014e-05	166.985	6.79	0.05	6.79	0.0500127	3.27084e-09	1570	83.1
1570	27	9.4272e-05	166.875	6.795	0.05	6.79507	0.0500004	3.17732e-09	1570	83.1
1570	27	8.25428e-05	166.069	6.8	0.05	6.80019	0.0500004	3.07469e-09	1570	83.1
1570	27	7.56808e-05	166.513	6.805	0.05	6.80529	0.0500025	3.1792e-09	1570	83.1
1570	27	7.31842e-05	166.158	6.81	0.05	6.80996	0.0500055	3.00206e-09	1570	83.1
1570	27	7.36295e-05	165.816	6.815	0.05	6.81505	0.0500087	3.04828e-09	1570	83.1
1570	27	7.25948e-05	165.924	6.82	0.05	6.82014	0.0500043	2.95298e-09	1570	83.1
1570	27	7.67274e-05	165.626	6.825	0.05	6.82494	0.050004	3.00924e-09	1570	83.1
1570	27	8.17101e-05	166.091	6.83	0.05	6.83008	0.0499931	3.03378e-09	1570	83.1
1570	27	8.65178e-05	166.595	6.835	0.05	6.83509	0.0500071	3.16241e-09	1570	83.1
1570	27	9.16209e-05	166.977	6.84	0.05	6.8402	0.0500056	3.01096e-09	1570	83.1
1570	27	9.40624e-05	166.821	6.845	0.05	6.84499	0.0500034	3.06583e-09	1570	83.1
1570	27	0.000100013	167.472	6.85	0.05	6.85005	0.0500033	3.18174e-09	1570	83.1
1570	27	0.000101556	168.088	6.855	0.05	6.85507	0.0500095	3.08743e-09	1570	83.1
1570	27	0.000105688	167.455	6.86	0.05	6.85987	0.0500147	3.1158e-09	1570	83.1
1570	27	0.000105603	167.503	6.865	0.05	6.86498	0.0500007	3.07694e-09	1570	83.1
1570	27	0.000102036	167.437	6.87	0.05	6.87	0.0500056	3.10091e-09	1570	83.1
1570	27	9.51096e-05	166.995	6.875	0.05	6.8751	0.0500047	3.07197e-09	1570	83.1
1570	27	8.87991e-05	166.73	6.88	0.05	6.87987	0.0500096	3.03763e-09	1570	83.1
1570	27	8.12888e-05	166.41	6.885	0.05	6.88499	0.0500081	3.1495e-09	1570	83.1
1570	28	7.70016e-05	165.502	6.89	0.05	6.89012	0.0500112	3.07717e-09	1570	83.1
1570	27	7.22971e-05	165.695	6.895	0.05	6.89526	0.0500036	3.06492e-09	1570	83.1
1570	27	7.37145e-05	165.743	6.9	0.05	6.89994	0.0500064	2.95618e-09	1570	83.1
1570	27	7.61923e-05	166.182	6.905	0.05	6.90505	0.0499978	2.99877e-09	1570	83.1
1570	27	8.03967e-05	166.466	6.91	0.05	6.91006	0.0500107	3.03666e-09	1570	83.1
1570	27	8.53564e-05	167.115	6.915	0.05	6.91484	0.0500052	2.97391e-09	1570	83.1
1570	27	8.9539e-05	167.1	6.92	0.05	6.91991	0.0500071	3.03995e-09	1570	83.1
1570	27	9.64587e-05	167.278	6.925	0.05	6.92506	0.0499998	3.08358e-09	1570	83.1
1570	27	9.91739e-05	167.208	6.93	0.05	6.93015	0.0500096	3.10074e-09	1570	83.1
1570	27	9.77578e-05	167.379	6.935	0.05	6.93503	0.0500026	2.93823e-09	1570	83.1
1570	27	9.64044e-05	167.045	6.94	0.05	6.94006	0.0500068	2.98261e-09	1570	83.1
1570	27	9.41175e-05	166.863	6.945	0.05	6.94505	0.0500105	3.09294e-09	1570	83.1
1570	27	9.00912e-05	167.237	6.95	0.05	6.95015	0.0500067	3.03092e-09	1570	83.1
1570	27	8.61892e-05	166.845	6.955	0.05	6.9549	0.0500091	2.95864e-09	1570	83.1
1570	27	8.49479e-05	167.193	6.96	0.05	6.96004	0.0500003	3.0947e-09	1570	83.1
1570	27	7.84146e-05	166.525	6.965	0.05	6.96515	0.0499965	2.8679e-09	1570	83.1
1570	27	7.53515e-05	165.8	6.97	0.05	6.96988	0.0500063	3.05666e-09	1570	83.1
1570	27	7.26989e-05	166.452	6.975	0.05	6.97497	0.0500092	3.02999e-09	1570	83.1
1570	27	7.18726e-05	165.432	6.98	0.05	6.98008	0.0500027	2.89291e-09	1570	83.1
1570	27	7.55108e-05	166.096	6.985	0.05	6.9852	0.0500025	2.92229e-09	1570	83.1
1570	27	7.95523e-05	166.862	6.99	0.05	6.98991	0.0500027	3.02264e-09	1570	83.1
1570	27	8.42298e-05	166.696	6.995	0.05	6.99498	0.0500036	2.96787e-09	1570	83.1
1570	27	9.04153e-05	167.469	7	0.05	7.00016	0.0500012	2.95566e-09	1570	83.1
1570	27	9.5955e-05	167.439	7.005	0.05	7.00497	0.0500118	2.96949e-09	1570	83.1
1570	27	9.8893e-05	166.97	7.01	0.05	7.01005	0.0500111	2.99859e-09	1570	83.1
1570	27	0.000102324	167.096	7.015	0.05	7.01507	0.0500074	3.1366e-09	1570	83.1
1570	27	0.000103637	167.377	7.02	0.05	7.02018	0.0500112	3.07542e-09	1570	83.1
1570	27	0.000102341	167.357	7.025	0.05	7.02494	0.0500062	3.19815e-09	1570	83.1
1570	27	9.84779e-05	167.443	7.03	0.05	7.03005	0.0500032	3.14967e-09	1570	83.1
1570	27	9.38052e-05	167.01	7.035	0.05	7.03515	0.0500047	3.08394e-09	1570	83.1
1570	27	8.72861e-05	166.981	7.04	0.05	7.04021	0.050004	3.10072e-09	1570	83.1
1570	27	7.82542e-05	165.974	7.045	0.05	7.04499	0.0500113	2.98157e-09	1570	83.1
1570	27	7.14984e-05	165.913	7.05	0.05	7.05013	0.0500093	2.95804e-09	1570	83.1
1570	27	7.13667e-05	166.073	7.055	0.05	7.05518	0.0500089	3.0971e-09	1570	83.1
1570	27	7.37599e-05	166.511	7.06	0.05	7.05984	0.0499973	2.8841e-09	1570	83.1
1570	27	7.58535e-05	165.99	7.065	0.05	7.06502	0.050002	2.94158e-09	1570	83.1
1570	27	7.82687e-05	166.401	7.07	0.05	7.07015	0.0500029	2.99152e-09	1570	83.1
1570	27	8.18533e-05	166.596	7.075	0.05	7.07526	0.0500076	3.08479e-09	1570	83.1
1570	27	8.75678e-05	166.692	7.08	0.05	7.08002	0.0500044	3.05175e-09	1570	83.1
1570	27	9.32901e-05	167.372	7.085	0.05	7.08512	0.0499994	3.06735e-09	1570	83.1
1570	27	9.61551e-05	167.209	7.09	0.05	7.09015	0.0500064	2.99011e-09	1570	83.1
1570	27	9.82027e-05	167.303	7.095	0.05	7.0952	0.0500016	3.13946e-09	1570	83.1
1570	27	9.73126e-05	166.748	7.1	0.05	7.09998	0.0500014	3.00845e-09	1570	83.1
1570	27	9.97869e-05	167.305	7.105	0.05	7.10505	0.0500005	3.17419e-09	1570	83.1
1570	27	9.70543e-05	167.33	7.11	0.05	7.11014	0.0500035	3.09821e-09	1570	83.1
1570	27	9.4079e-05	166.647	7.115	0.05	7.11494	0.0500082	3.00948e-09	1570	83.1
1570	27	8.70748e-05	167.073	7.12	0.05	7.12	0.0500136	3.06589e-09	1570	83.1
1570	27	8.06541e-05	166.406	7.125	0.05	7.12519	0.0500077	2.95881e-09	1570	83.1
1570	27	7.66109e-05	165.601	7.13	0.05	7.13023	0.0500102	2.9105e-09	1570	83.1
1570	27	7.38723e-05	166.089	7.135	0.05	7.135	0.0500067	3.04395e-09	1570	83.1
1570	27	7.3205e-05	165.956	7.14	0.05	7.14009	0.0500074	3.01851e-09	1570	83.1
1570	27	7.53461e-05	166.098	7.145	0.05	7.14515	0.0500157	3.05254e-09	1570	83.1
1570	27	8.22558e-05	166.219	7.15	0.05	7.15029	0.0499958	2.94562e-09	1570	83.1
1570	27	8.65091e-05	167.226	7.155	0.05	7.15504	0.0500106	2.96699e-09	1570	83.1
1570	27	9.10948e-05	167.038	7.16	0.05	7.16013	0.0500042	3.1409e-09	1570	83.1
1570	27	9.33797e-05	166.793	7.165	0.05	7.16514	0.0500083	3.07649e-09	1570	83.1
1570	28	9.95721e-05	167.57	7.17	0.05	7.16996	0.049999	3.04065e-09	1570	83.1
1570	28	0.00010047	167.242	7.175	0.05	7.17495	0.0500059	3.03281e-09	1570	83.1
1570	27	0.000103304	167.966	7.18	0.05	7.18009	0.050007	3.21092e-09	1570	83.1
1570	27	0.00010048	167.614	7.185	0.05	7.18512	0.0500071	3.02303e-09	1570	83.1
1570	27	9.7757e-05	166.956	7.19	0.05	7.18989	0.0500054	3.02561e-09	1570	83.1
1570	27	9.30177e-05	166.597	7.195	0.05	7.195	0.0500015	3.0144e-09	1570	83.1
1570	27	8.69487e-05	166.549	7.2	0.05	7.20008	0.0500128	3.13192e-09	1570	83.1
1570	27	7.61353e-05	166.813	7.205	0.05	7.20491	0.0500093	2.91378e-09	1570	83.1
1570	27	7.1509e-05	165.498	7.21	0.05	7.21001	0.0500049	2.90234e-09	1570	83.1
1570	27	7.11294e-05	165.479	7.215	0.05	7.21512	0.0500056	3.08865e-09	1570	83.1
1570	27	7.27678e-05	166.395	7.22	0.05	7.22016	0.0500069	3.0021e-09	1570	83.1
1570	27	7.56452e-05	166.102	7.225	0.05	7.22496	0.0500088	3.1083e-09	1570	83.1
1570	27	7.95751e-05	165.892	7.23	0.05	7.23001	0.0500026	2.96296e-09	1570	83.1
1570	27	8.51442e-05	167.012	7.235	0.05	7.23511	0.0500061	3.19344e-09	1570	83.1
1570	27	9.24583e-05	166.692	7.24	0.05	7.24026	0.0500112	3.14802e-09	1570	83.1
1570	27	9.66582e-05	167.264	7.245	0.05	7.24495	0.0500024	3.07962e-09	1570	83.1
1570	27	0.000101269	167.235	7.25	0.05	7.25001	0.0500057	3.21631e-09	1570	83.1
1570	27	0.000100249	167.298	7.255	0.05	7.25513	0.0500069	3.04526e-09	1570	83.1
1570	27	9.97184e-05	167.213	7.26	0.05	7.25997	0.0500075	3.21632e-09	1570	83.1
1570	27	9.6939e-05	167.273	7.265	0.05	7.26507	0.0500136	3.14486e-09	1570	83.1
1570	27	9.42659e-05	167.118	7.27	0.05	7.27015	0.0499997	3.18817e-09	1570	83.1
1570	27	8.9405e-05	167.371	7.275	0.05	7.27516	0.0500123	3.09486e-09	1570	83.1
1570	27	8.31481e-05	166.586	7.28	0.05	7.27985	0.0500116	3.1144e-09	1570	83.1
1570	27	7.8087e-05	166.323	7.285	0.05	7.28509	0.0500064	3.15609e-09	1570	83.1
1570	27	7.47922e-05	165.595	7.29	0.05	7.29017	0.0500009	3.14637e-09	1570	83.1
1570	27	7.29606e-05	165.863	7.295	0.05	7.29521	0.0499978	3.11433e-09	1570	83.1
1570	27	7.24077e-05	165.844	7.3	0.05	7.29996	0.0500082	3.14653e-09	1570	83.1
1570	27	7.80749e-05	166.247	7.305	0.05	7.30505	0.050015	3.13256e-09	1570	83.1
1570	27	8.17772e-05	166.458	7.31	0.05	7.31016	0.0500048	3.11955e-09	1570	83.1
1570	27	8.73573e-05	166.499	7.315	0.05	7.31491	0.0500111	3.03615e-09	1570	83.1
1570	27	9.16975e-05	167.123	7.32	0.05	7.31998	0.0500063	3.18677e-09	1570	83.1
1570	27	9.71393e-05	167.721	7.325	0.05	7.3252	0.0500033	3.11569e-09	1570	83.1
1570	27	0.000101494	167.374	7.33	0.05	7.3303	0.0500075	3.08143e-09	1570	83.1
1570	27	0.000101788	167.401	7.335	0.05	7.33506	0.0499938	3.18923e-09	1570	83.1
1570	27	0.000100754	167.627	7.34	0.05	7.34015	0.0500136	3.16997e-09	1570	83.1
1570	27	9.99156e-05	167.325	7.345	0.05	7.34511	0.0500108	3.0634e-09	1570	83.1
1570	27	9.71155e-05	167.425	7.35	0.05	7.34989	0.050006	3.18025e-09	1570	83.1
1570	27	9.00847e-05	166.747	7.355	0.05	7.35508	0.0500089	3.17236e-09	1570	83.1
1570	27	8.25758e-05	166.505	7.36	0.05	7.36022	0.0500082	3.10252e-09	1570	83.1
1570	27	7.91623e-05	166.163	7.365	0.05	7.3652	0.0500094	2.95939e-09	1570	83.1
1570	27	7.51416e-05	165.823	7.37	0.05	7.37001	0.050008	2.92669e-09	1570	83.1
1570	27	7.22988e-05	166.107	7.375	0.05	7.37504	0.0500024	2.91022e-09	1570	83.1
1570	27	7.31868e-05	165.708	7.38	0.05	7.38018	0.0500069	3.0185e-09	1570	83.1
1570	27	7.45348e-05	165.925	7.385	0.05	7.38526	0.0500142	3.06993e-09	1570	83.1
1570	27	7.6906e-05	166.306	7.39	0.05	7.38998	0.0500139	3.05609e-09	1570	83.1
1570	27	8.29665e-05	166.57	7.395	0.05	7.39509	0.0500093	3.1505e-09	1570	83.1
1570	27	9.10786e-05	166.788	7.4	0.05	7.40012	0.0500016	3.06757e-09	1570	83.1
1570	27	9.5578e-05	167.456	7.405	0.05	7.40503	0.0500113	2.99325e-09	1570	83.1
1570	27	0.000100336	166.98	7.41	0.05	7.41009	0.0500031	3.01942e-09	1570	83.1
1570	27	0.000100542	166.812	7.415	0.05	7.41511	0.0500047	3.11563e-09	1570	83.1
1570	27	0.000100946	166.811	7.42	0.05	7.42026	0.0500081	3.06189e-09	1570	83.1
1570	27	0.000100342	166.843	7.425	0.05	7.42498	0.0500069	3.10398e-09	1570	83.1
1570	27	9.79968e-05	166.57	7.43	0.05	7.43013	0.0500028	3.02902e-09	1570	83.1
1570	27	9.89646e-05	167.1	7.435	0.05	7.43521	0.0500098	3.14121e-09	1570	83.1
1570	27	9.02651e-05	166.706	7.44	0.05	7.4403	0.0500089	2.96928e-09	1570	83.1
1570	27	8.37532e-05	166.829	7.445	0.05	7.44506	0.0500034	2.98764e-09	1570	83.1
1570	27	7.36584e-05	165.962	7.45	0.05	7.45016	0.050009	2.87492e-09	1570	83.1
1570	27	7.00333e-05	165.716	7.455	0.05	7.45527	0.0500109	2.95299e-09	1570	83.1
1570	27	7.12823e-05	165.961	7.46	0.05	7.46007	0.0500032	2.9365e-09	1570	83.1
1570	27	7.39407e-05	165.771	7.465	0.05	7.4651	0.0500036	3.02989e-09	1570	83.1
1570	27	7.861e-05	166.289	7.47	0.05	7.4702	0.0500108	2.93115e-09	1570	83.1
1570	27	8.29349e-05	166.096	7.475	0.05	7.47528	0.0500036	2.94277e-09	1570	83.1
1570	27	8.83259e-05	167.347	7.48	0.05	7.48002	0.0500023	3.01282e-09	1570	83.1
1570	27	9.26526e-05	167	7.485	0.05	7.48506	0.0500038	3.09906e-09	1570	83.1
1570	27	9.83792e-05	167.475	7.49	0.05	7.49011	0.0500101	3.10922e-09	1570	83.1
1570	27	0.000101287	167.053	7.495	0.05	7.49491	0.0500187	3.19541e-09	1570	83.1
1570	27	0.000100857	166.926	7.5	0.05	7.49998	0.0500135	3.0051e-09	1570	83.1
1570	27	9.9518e-05	166.822	7.505	0.05	7.50502	0.0500134	3.09365e-09	1570	83.1
1570	27	9.77067e-05	167.636	7.51	0.05	7.51016	0.0500161	3.05239e-09	1570	83.1
1570	27	9.24635e-05	167.248	7.515	0.05	7.51491	0.0500044	3.06818e-09	1570	83.1
1570	27	8.45475e-05	166.492	7.52	0.05	7.51998	0.0500087	3.07507e-09	1570	83.1
1570	27	8.00137e-05	166.312	7.525	0.05	7.52519	0.0500073	3.00551e-09	1570	83.1
1570	27	7.02694e-05	165.841	7.53	0.05	7.53023	0.0500158	2.9256e-09	1570	83.1
1570	27	6.84335e-05	165.152	7.535	0.05	7.53492	0.0500133	2.81515e-09	1570	83.1
1570	27	6.9854e-05	166.318	7.54	0.05	7.54009	0.050011	3.02579e-09	1570	83.1
1570	27	7.41233e-05	166.155	7.545	0.05	7.54516	0.050019	2.97318e-09	1570	83.1
1570	27	7.77415e-05	166.485	7.55	0.05	7.54991	0.0500073	2.91359e-09	1570	83.1
1570	27	7.97042e-05	166.766	7.555	0.05	7.55499	0.0500022	3.05597e-09	1570	83.1
1570	27	8.66333e-05	167.052	7.56	0.05	7.56018	0.050009	3.04972e-09	1570	83.1
1570	27	9.35928e-05	167.146	7.565	0.05	7.56513	0.0500076	3.06471e-09	1570	83.1
1570	27	9.78002e-05	167.126	7.57	0.05	7.56995	0.0500126	3.07324e-09	1570	83.1
1570	27	9.77048e-05	167.638	7.575	0.05	7.57513	0.0500042	3.01148e-09	1570	83.1
1570	27	0.000103558	167.526	7.58	0.05	7.58012	0.050004	3.01792e-09	1570	83.1
1570	27	0.000101956	167.023	7.585	0.05	7.58526	0.0500079	3.00515e-09	1570	83.1
1570	27	9.92489e-05	167.4	7.59	0.05	7.59003	0.0500081	2.99154e-09	1570	83.1
1570	27	9.3873e-05	167.096	7.595	0.05	7.59518	0.0499973	3.01533e-09	1570	83.1
1570	27	8.97994e-05	167.036	7.6	0.05	7.6002	0.0500056	2.99216e-09	1570	83.1
1570	27	8.3357e-05	166.789	7.605	0.05	7.60494	0.0500049	3.03003e-09	1570	83.1
1570	27	7.67779e-05	166.566	7.61	0.05	7.60999	0.0500001	3.0406e-09	1570	83.1
1570	27	7.33675e-05	166.207	7.615	0.05	7.61518	0.0500085	2.9804e-09	1570	83.1
1570	27	7.27085e-05	166.146	7.62	0.05	7.62027	0.0500061	2.88423e-09	1570	83.1
1570	27	7.38778e-05	165.574	7.625	0.05	7.62499	0.0500104	2.88794e-09	1570	83.1
1570	27	7.72056e-05	166.243	7.63	0.05	7.63011	0.0499978	2.9303e-09	1570	83.1
1570	27	8.26468e-05	166.306	7.635	0.05	7.63515	0.0500009	2.98203e-09	1570	83.1
1570	27	8.71481e-05	166.588	7.64	0.05	7.64024	0.050008	2.92733e-09	1570	83.1
1570	27	9.28506e-05	167.033	7.645	0.05	7.64499	0.050005	2.96772e-09	1570	83.1
1570	27	9.68238e-05	167.304	7.65	0.05	7.65007	0.0500056	2.97165e-09	1570	83.1
1570	27	0.000102328	167.342	7.655	0.05	7.65514	0.0500114	3.01697e-09	1570	83.1
1570	27	0.000105421	167.65	7.66	0.05	7.65999	0.050011	3.09574e-09	1570	83.1
1570	27	0.000108068	167.567	7.665	0.05	7.66497	0.0500044	3.01879e-09	1570	83.1
1570	27	0.00010188	167.394	7.67	0.05	7.67012	0.0500084	3.06607e-09	1570	83.1
1570	27	9.03178e-05	166.276	7.675	0.05	7.67515	0.0500086	3.06211e-09	1570	83.1
1570	27	8.46323e-05	166.114	7.68	0.05	7.67997	0.0500168	3.05767e-09	1570	83.1
1570	27	8.19547e-05	166.764	7.685	0.05	7.68506	0.0500079	2.91893e-09	1570	83.1
1570	27	7.66925e-05	166.281	7.69	0.05	7.69011	0.0500116	3.09207e-09	1570	83.1
1570	27	7.44842e-05	166.036	7.695	0.05	7.69485	0.050005	2.91579e-09	1570	83.1
1570	27	7.38001e-05	165.07	7.7	0.05	7.70006	0.0500121	3.03986e-09	1570	83.1
1570	27	7.40003e-05	165.673	7.705	0.05	7.70513	0.050013	2.8959e-09	1570	83.1
1570	27	7.84706e-05	165.898	7.71	0.05	7.71028	0.0500145	2.93729e-09	1570	83.1
1570	27	8.1407e-05	165.865	7.715	0.05	7.71498	0.0500155	3.05856e-09	1570	83.1
1570	27	8.7876e-05	166.676	7.72	0.05	7.72011	0.0500082	3.00309e-09	1570	83.1
1570	27	9.22716e-05	166.678	7.725	0.05	7.72513	0.0500086	2.9773e-09	1570	83.1
1570	27	9.90929e-05	167.438	7.73	0.05	7.73022	0.0500085	3.15096e-09	1570	83.1
1570	27	0.000102697	167.705	7.735	0.05	7.73497	0.0500006	3.18548e-09	1570	83.1
1570	27	0.000105389	167.555	7.74	0.05	7.74003	0.0500098	3.09722e-09	1570	83.1
1570	27	0.000103693	167.666	7.745	0.05	7.74516	0.0500131	3.10814e-09	1570	83.1
1570	27	0.000100446	167.108	7.75	0.05	7.74993	0.0500127	3.04825e-09	1570	83.1
1570	27	9.71677e-05	167.074	7.755	0.05	7.75506	0.0500016	3.02582e-09	1570	83.1
1570	27	9.16427e-05	166.86	7.76	0.05	7.76014	0.0500114	3.1379e-09	1570	83.1
1570	28	8.80739e-05	166.932	7.765	0.05	7.76521	0.0500074	3.139e-09	1570	83.1
1570	27	7.82214e-05	166.095	7.77	0.05	7.77002	0.0500077	2.99642e-09	1570	83.1
1570	28	7.44808e-05	165.569	7.775	0.05	7.77512	0.0500045	3.00341e-09	1570	83.1
1570	27	7.2651e-05	165.944	7.78	0.05	7.78009	0.050005	2.86957e-09	1570	83.1
1570	27	7.29131e-05	165.741	7.785	0.05	7.78524	0.050011	3.03324e-09	1570	83.1
1570	27	7.54051e-05	166.5	7.79	0.05	7.79	0.0500063	2.95242e-09	1570	83.1
1570	27	7.90749e-05	166.48	7.795	0.05	7.79513	0.0500078	3.06451e-09	1570	83.1
1570	27	8.38101e-05	166.304	7.8	0.05	7.80022	0.0500169	3.0015e-09	1570	83.1
1570	27	8.93635e-05	167.104	7.805	0.05	7.80493	0.0500068	2.93688e-09	1570	83.1
1570	27	9.4536e-05	167.706	7.81	0.05	7.81	0.0500028	3.00251e-09	1570	83.1
1570	27	9.7015e-05	167.382	7.815	0.05	7.8151	0.0500101	3.05508e-09	1570	83.1
1570	27	0.000100212	167.086	7.82	0.05	7.82009	0.0500077	2.94099e-09	1570	83.1
1570	27	0.00010292	167.249	7.825	0.05	7.82494	0.0500055	2.99809e-09	1570	83.1
1570	27	0.00010271	167.239	7.83	0.05	7.83	0.0500116	3.15115e-09	1570	83.1
1570	27	0.000102234	167.511	7.835	0.05	7.83514	0.0500085	2.97565e-09	1570	83.1
1570	27	9.66475e-05	167.35	7.84	0.05	7.83989	0.0500046	2.96457e-09	1570	83.1
1570	27	9.11589e-05	166.265	7.845	0.05	7.84499	0.0500091	3.0645e-09	1570	83.1
1570	27	8.13907e-05	166.373	7.85	0.05	7.85004	0.050012	3.02973e-09	1570	83.1
1570	27	7.67147e-05	166.374	7.855	0.05	7.85524	0.0500082	2.84191e-09	1570	83.1
1570	27	7.32228e-05	165.42	7.86	0.05	7.85994	0.0500154	2.81903e-09	1570	83.1
1570	27	7.52533e-05	165.357	7.865	0.05	7.86502	0.0500172	2.84703e-09	1570	83.1
1570	27	7.33331e-05	166.335	7.87	0.05	7.87014	0.0500044	2.84157e-09	1570	83.1
1570	27	7.58955e-05	166.226	7.875	0.05	7.87517	0.0500144	2.85292e-09	1570	83.1
1570	27	7.96822e-05	166.34	7.88	0.05	7.87996	0.0500133	2.87504e-09	1570	83.1
1570	27	8.46485e-05	166.851	7.885	0.05	7.88504	0.0500044	2.87841e-09	1570	83.1
1570	27	8.97946e-05	166.761	7.89	0.05	7.8902	0.0500062	3.036e-09	1570	83.1
1570	27	9.46679e-05	167.561	7.895	0.05	7.89498	0.0500111	3.0555e-09	1570	83.1
1570	27	9.92372e-05	167.672	7.9	0.05	7.89999	0.0500101	2.93682e-09	1570	83.1
1570	27	0.000101872	167.744	7.905	0.05	7.90507	0.0500159	3.06028e-09	1570	83.1
1570	27	0.000103571	167.429	7.91	0.05	7.91016	0.0500077	3.10259e-09	1570	83.1
1570	28	0.000100481	167.51	7.915	0.05	7.91493	0.0500149	3.03679e-09	1570	83.1
1570	27	9.81308e-05	167.563	7.92	0.05	7.92002	0.0500092	2.91583e-09	1570	83.1
1570	27	9.1063e-05	167.613	7.925	0.05	7.92516	0.0500058	2.88832e-09	1570	83.1
1570	27	8.55551e-05	166.374	7.93	0.05	7.93026	0.0500033	2.8465e-09	1570	83.1
1570	27	7.93201e-05	166.414	7.935	0.05	7.93501	0.0500129	2.97648e-09	1570	83.1
1570	27	7.35367e-05	166.114	7.94	0.05	7.94007	0.0500109	2.89625e-09	1570	83.1
1570	27	7.17228e-05	165.569	7.945	0.05	7.94517	0.0500223	2.93209e-09	1570	83.1
1570	27	6.93986e-05	165.443	7.95	0.05	7.94991	0.0500172	2.98818e-09	1570	83.1
1570	27	7.26759e-05	166.13	7.955	0.05	7.95509	0.0500168	2.98797e-09	1570	83.1
1570	27	7.54958e-05	165.391	7.96	0.05	7.96013	0.0500098	2.88589e-09	1570	83.1
1570	27	8.41354e-05	165.927	7.965	0.05	7.96515	0.0500083	2.85551e-09	1570	83.1
1570	27	8.85627e-05	167.029	7.97	0.05	7.96997	0.0500105	2.93722e-09	1570	83.1
1570	27	9.24311e-05	166.967	7.975	0.05	7.97501	0.0500142	2.92472e-09	1570	83.1
1570	27	9.85354e-05	166.86	7.98	0.05	7.98015	0.0500111	2.92584e-09	1570	83.1
1570	27	9.92688e-05	167.141	7.985	0.05	7.98486	0.0500188	2.98322e-09	1570	83.1
1570	27	0.000101735	167.251	7.99	0.05	7.98996	0.0500085	3.08896e-09	1570	83.1
1570	27	0.000100306	166.601	7.995	0.05	7.9951	0.0500157	3.03274e-09	1570	83.1
1570	27	9.57728e-05	166.776	8	0.05	8.0002	0.0500132	2.94963e-09	1570	83.1
1570	27	9.05028e-05	166.946	8.005	0.05	8.00502	0.0500065	3.0035e-09	1570	83.1
1570	27	8.54227e-05	165.681	8.01	0.05	8.01003	0.0500233	3.02709e-09	1570	83.1
1570	27	7.99586e-05	166.369	8.015	0.05	8.01513	0.0500101	2.85654e-09	1570	83.1
1570	27	7.41142e-05	166.423	8.02	0.05	8.02026	0.0500107	2.87483e-09	1570	83.1
1570	27	7.06223e-05	166.105	8.025	0.05	8.02494	0.0500119	2.92555e-09	1570	83.1
1570	27	7.06609e-05	166.063	8.03	0.05	8.03001	0.0500063	2.84787e-09	1570	83.1
1570	27	7.47068e-05	165.933	8.035	0.05	8.03519	0.0500123	2.96273e-09	1570	83.1
1570	27	7.85501e-05	165.994	8.04	0.05	8.03995	0.0500062	2.83786e-09	1570	83.1
1570	27	8.41399e-05	166.813	8.045	0.05	8.04505	0.0500061	2.96951e-09	1570	83.1
1570	27	8.72767e-05	167.03	8.05	0.05	8.0501	0.0500115	2.92212e-09	1570	83.1
1570	27	9.56297e-05	166.794	8.055	0.05	8.05524	0.050012	2.91456e-09	1570	83.1
1570	27	9.87721e-05	167.271	8.06	0.05	8.06	0.0500045	3.04169e-09	1570	83.1
1570	27	0.000100997	167.799	8.065	0.05	8.06503	0.0500107	3.10706e-09	1570	83.1
1570	27	0.000102482	167.253	8.07	0.05	8.07003	0.0500118	2.99193e-09	1570	83.1
1570	27	9.9533e-05	167.305	8.075	0.05	8.07518	0.0500117	3.09825e-09	1570	83.1
1570	27	9.60157e-05	167.244	8.08	0.05	8.08002	0.0500151	2.97725e-09	1570	83.1
1570	27	9.17647e-05	166.653	8.085	0.05	8.08504	0.050017	2.99477e-09	1570	83.1
1570	27	9.13715e-05	166.719	8.09	0.05	8.09019	0.050007	2.91357e-09	1570	83.1
1570	27	8.55934e-05	166.344	8.095	0.05	8.09497	0.0500098	3.03432e-09	1570	83.1
1570	27	7.93438e-05	165.721	8.1	0.05	8.10004	0.0500096	2.85463e-09	1570	83.1
1570	27	7.47101e-05	165.786	8.105	0.05	8.10517	0.0500024	2.96788e-09	1570	83.1
1570	27	7.16411e-05	165.323	8.11	0.05	8.11018	0.0500021	2.87299e-09	1570	83.1
1570	27	7.53233e-05	165.657	8.115	0.05	8.11499	0.0500025	2.97437e-09	1570	83.1
1570	27	7.70852e-05	165.741	8.12	0.05	8.12007	0.0500071	2.87228e-09	1570	83.1
1570	27	8.09433e-05	165.758	8.125	0.05	8.12519	0.0500005	2.98387e-09	1570	83.1
1570	27	8.80669e-05	167.044	8.13	0.05	8.13027	0.0500135	3.03328e-09	1570	83.1
1570	27	9.32089e-05	167.383	8.135	0.05	8.13507	0.0500124	2.97905e-09	1570	83.1
1570	27	9.83445e-05	167.753	8.14	0.05	8.14007	0.0500009	3.11117e-09	1570	83.1
1570	27	0.00010187	167.593	8.145	0.05	8.14515	0.0500103	3.00165e-09	1570	83.1
1570	27	9.69877e-05	167.087	8.15	0.05	8.14984	0.0500166	3.09626e-09	1570	83.1
1570	27	9.39289e-05	166.841	8.155	0.05	8.15493	0.0500126	3.08228e-09	1570	83.1
1570	27	9.07436e-05	167.398	8.16	0.05	8.16004	0.0500167	3.11324e-09	1570	83.1
1570	27	8.38488e-05	166.052	8.165	0.05	8.16522	0.0500149	2.93189e-09	1570	83.1
1570	27	7.89952e-05	165.99	8.17	0.05	8.17001	0.0500029	3.07139e-09	1570	83.1
1570	28	7.78148e-05	166.298	8.175	0.05	8.17507	0.0500079	2.93553e-09	1570	83.1
1570	27	7.48542e-05	166.656	8.18	0.05	8.18015	0.0500061	2.97464e-09	1570	83.1
1570	27	7.24303e-05	166.595	8.185	0.05	8.18485	0.0500085	2.90513e-09	1570	83.1
1570	27	7.27548e-05	165.913	8.19	0.05	8.19001	0.0500036	3.04652e-09	1570	83.1
1570	27	7.49744e-05	166.466	8.195	0.05	8.19506	0.0500121	2.87299e-09	1570	83.1
1570	27	7.94235e-05	165.858	8.2	0.05	8.20017	0.0500027	3.0776e-09	1570	83.1
1570	27	8.39706e-05	166.266	8.205	0.05	8.20497	0.050005	2.97419e-09	1570	83.1
1570	27	8.98754e-05	167.032	8.21	0.05	8.20997	0.0499999	2.97076e-09	1570	83.1
1570	27	9.55852e-05	167.271	8.215	0.05	8.2151	0.0500098	2.96847e-09	1570	83.1
1570	27	9.85208e-05	166.952	8.22	0.05	8.22023	0.0500139	3.11122e-09	1570	83.1
1570	27	0.000100255	167.62	8.225	0.05	8.22493	0.0500087	3.07251e-09	1570	83.1
1570	27	0.000103641	167.518	8.23	0.05	8.23006	0.0500026	3.12797e-09	1570	83.1
1570	27	0.000103004	167.375	8.235	0.05	8.23508	0.0500096	3.10175e-09	1570	83.1
1570	27	9.89364e-05	167.018	8.24	0.05	8.23994	0.0500127	2.96769e-09	1570	83.1
1570	27	9.74175e-05	167.48	8.245	0.05	8.24501	0.0500108	3.00173e-09	1570	83.1
1570	27	9.02528e-05	166.867	8.25	0.05	8.25003	0.0500117	2.91896e-09	1570	83.1
1570	27	8.4003e-05	166.082	8.255	0.05	8.25509	0.0500088	3.02654e-09	1570	83.1
1570	27	7.7852e-05	166.427	8.26	0.05	8.26003	0.0500123	2.9587e-09	1570	83.1
1570	27	7.39246e-05	166.216	8.265	0.05	8.26512	0.0500175	2.97261e-09	1570	83.1
1570	27	7.02958e-05	166.281	8.27	0.05	8.27013	0.0500116	2.96604e-09	1570	83.1
1570	27	7.07439e-05	166.294	8.275	0.05	8.27527	0.0500006	2.92555e-09	1570	83.1
1570	27	7.44493e-05	165.803	8.28	0.05	8.28003	0.0500069	2.87346e-09	1570	83.1
1570	27	8.01969e-05	166.163	8.285	0.05	8.28512	0.0500193	2.88373e-09	1570	83.1
1570	27	8.51156e-05	167.164	8.29	0.05	8.29018	0.0500063	2.84941e-09	1570	83.1
1570	27	9.03933e-05	167.124	8.295	0.05	8.2949	0.0500065	2.94882e-09	1570	83.1
1570	27	9.43737e-05	167.276	8.3	0.05	8.30006	0.0500072	2.88734e-09	1570	83.1
1570	27	9.76344e-05	167	8.305	0.05	8.30522	0.0500048	2.97252e-09	1570	83.1
1570	27	0.000103648	167.602	8.31	0.05	8.31023	0.0499999	2.96934e-09	1570	83.1
1570	27	0.00010204	166.754	8.315	0.05	8.31502	0.0500081	2.94412e-09	1570	83.1
1570	28	0.000100919	167.222	8.32	0.05	8.32006	0.0500111	3.02738e-09	1570	83.1
1570	27	9.5339e-05	167.074	8.325	0.05	8.32512	0.0500046	2.85712e-09	1570	83.1
1570	27	9.25207e-05	166.618	8.33	0.05	8.32989	0.0500093	2.9096e-09	1570	83.1
1570	27	8.86095e-05	166.646	8.335	0.05	8.33502	0.0500051	2.92052e-09	1570	83.1
1570	27	8.1454e-05	165.938	8.34	0.05	8.34008	0.0500088	2.98169e-09	1570	83.1
1570	27	7.97678e-05	166.69	8.345	0.05	8.34515	0.0500023	2.90145e-09	1570	83.1
1570	27	7.61991e-05	166.385	8.35	0.05	8.34994	0.0500054	2.92119e-09	1570	83.1
1570	27	7.12981e-05	166.242	8.355	0.05	8.35498	0.0500087	2.96895e-09	1570	83.1
1570	27	7.54345e-05	166.093	8.36	0.05	8.36013	0.0500064	2.80763e-09	1570	83.1
1570	27	8.24465e-05	166.407	8.365	0.05	8.36515	0.0500081	2.83587e-09	1570	83.1
1570	27	8.80032e-05	166.381	8.37	0.05	8.36998	0.0500055	2.95943e-09	1570	83.1
1570	27	9.38349e-05	167.276	8.375	0.05	8.37509	0.0500013	3.02397e-09	1570	83.1
1570	27	9.8271e-05	167.385	8.38	0.05	8.38012	0.0500096	2.94453e-09	1570	83.1
1570	27	0.000101774	167.631	8.385	0.05	8.38494	0.0500021	3.08756e-09	1570	83.1
1570	27	0.000103663	167.692	8.39	0.05	8.39	0.0500095	3.02949e-09	1570	83.1
1570	27	0.000104732	167.759	8.395	0.05	8.39514	0.0500044	3.02124e-09	1570	83.1
1570	27	9.8944e-05	167.26	8.4	0.05	8.40026	0.0500089	2.86953e-09	1570	83.1
1570	27	9.48221e-05	167.05	8.405	0.05	8.40498	0.0499996	2.97198e-09	1570	83.1
1570	27	8.91864e-05	167.077	8.41	0.05	8.41005	0.049999	3.01245e-09	1570	83.1
1570	27	8.02755e-05	166.586	8.415	0.05	8.41513	0.0500133	2.92982e-09	1570	83.1
1570	27	7.34353e-05	166.006	8.42	0.05	8.42019	0.0500088	2.83055e-09	1570	83.1
1570	27	6.93548e-05	166.414	8.425	0.05	8.42506	0.0500064	2.74872e-09	1570	83.1
1570	27	6.92367e-05	164.872	8.43	0.05	8.43014	0.0500072	2.7764e-09	1570	83.1
1570	27	6.97113e-05	165.705	8.435	0.05	8.43516	0.0500091	2.96793e-09	1570	83.1
1570	27	7.46598e-05	166.139	8.44	0.05	8.43993	0.0500115	2.79255e-09	1570	83.1
1570	27	7.88656e-05	166.047	8.445	0.05	8.44505	0.0500049	2.8839e-09	1570	83.1
1570	27	8.32917e-05	166.384	8.45	0.05	8.45009	0.0500152	2.95907e-09	1570	83.1
1570	27	8.81002e-05	166.997	8.455	0.05	8.45515	0.050009	2.88643e-09	1570	83.1
1570	27	9.49908e-05	166.934	8.46	0.05	8.45999	0.0500064	2.95722e-09	1570	83.1
1570	27	9.87532e-05	167.159	8.465	0.05	8.46508	0.0500145	2.85355e-09	1570	83.1
1570	27	0.000101979	166.898	8.47	0.05	8.47009	0.0500076	3.09385e-09	1570	83.1
1570	27	0.000100424	167.317	8.475	0.05	8.47493	0.0500125	2.91969e-09	1570	83.1
1570	27	9.31463e-05	166.923	8.48	0.05	8.47991	0.0500136	2.87147e-09	1570	83.1
1570	27	8.56951e-05	166.202	8.485	0.05	8.48514	0.0500068	2.94356e-09	1570	83.1
1570	27	7.82396e-05	166.344	8.49	0.05	8.49022	0.0500028	2.96582e-09	1570	83.1
1570	27	7.78385e-05	165.997	8.495	0.05	8.49489	0.0500018	2.83453e-09	1570	83.1
1570	27	7.61748e-05	166.597	8.5	0.05	8.49997	0.0500084	2.83425e-09	1570	83.1
1570	27	7.18353e-05	165.811	8.505	0.05	8.5051	0.0500063	2.77525e-09	1570	83.1
1570	27	7.00664e-05	166.436	8.51	0.05	8.51027	0.0500041	2.8603e-09	1570	83.1
1570	27	7.38398e-05	165.619	8.515	0.05	8.51499	0.05001	2.82666e-09	1570	83.1
1570	27	7.78482e-05	166.356	8.52	0.05	8.52004	0.0500139	2.9164e-09	1570	83.1
1570	27	8.28308e-05	166.307	8.525	0.05	8.52514	0.0500074	2.94005e-09	1570	83.1
1570	27	8.69543e-05	166.105	8.53	0.05	8.52985	0.0500057	3.01497e-09	1570	83.1
1570	27	9.11435e-05	166.856	8.535	0.05	8.535	0.0500064	3.00796e-09	1570	83.1
1570	27	9.62019e-05	166.599	8.54	0.05	8.54006	0.0500074	2.89754e-09	1570	83.1
1570	27	9.72943e-05	167.303	8.545	0.05	8.54527	0.0500021	2.97515e-09	1570	83.1
1570	27	0.000101172	167.228	8.55	0.05	8.54998	0.0499977	3.0053e-09	1570	83.1
1570	27	0.000102283	167.501	8.555	0.05	8.55507	0.0500052	3.10799e-09	1570	83.1
1570	27	0.000100931	167.519	8.56	0.05	8.56015	0.0500015	3.09161e-09	1570	83.1
1570	27	9.68021e-05	167.214	8.565	0.05	8.56518	0.0500107	3.11441e-09	1570	83.1
1570	28	8.98949e-05	166.338	8.57	0.05	8.57	0.0500036	3.04915e-09	1570	83.1
1570	27	8.23057e-05	166.316	8.575	0.05	8.57502	0.050009	2.90734e-09	1570	83.1
1570	27	7.05279e-05	165.919	8.58	0.05	8.58008	0.0500073	2.85962e-09	1570	83.1
1570	27	6.84606e-05	165.427	8.585	0.05	8.58494	0.0500001	2.84323e-09	1570	83.1
1570	27	6.84416e-05	165.183	8.59	0.05	8.59009	0.0500112	2.95489e-09	1570	83.1
1570	27	7.32317e-05	165.711	8.595	0.05	8.59517	0.0500085	2.85274e-09	1570	83.1
1570	27	7.65833e-05	166.261	8.6	0.05	8.6001	0.0500077	2.96843e-09	1570	83.1
1570	27	8.07896e-05	166.711	8.605	0.05	8.60499	0.0500078	2.88848e-09	1570	83.1
1570	27	8.68567e-05	166.927	8.61	0.05	8.61004	0.0500091	3.02585e-09	1570	83.1
1570	27	9.26599e-05	167.455	8.615	0.05	8.61517	0.0500058	3.06373e-09	1570	83.1
1570	28	9.59085e-05	167.522	8.62	0.05	8.6202	0.0500097	3.02408e-09	1570	83.1
1570	27	9.68832e-05	167.612	8.625	0.05	8.62501	0.0500057	3.09667e-09	1570	83.1
1570	27	9.78291e-05	167.144	8.63	0.05	8.63005	0.0500014	3.05988e-09	1570	83.1
1570	27	9.61348e-05	167.294	8.635	0.05	8.63515	0.050003	3.00098e-09	1570	83.1
1570	27	9.29939e-05	167.133	8.64	0.05	8.63993	0.0500082	3.05348e-09	1570	83.1
1570	27	9.09835e-05	167.16	8.645	0.05	8.64505	0.0499973	2.89447e-09	1570	83.1
1570	27	8.46446e-05	166.533	8.65	0.05	8.65018	0.0500129	2.89004e-09	1570	83.1
1570	27	7.92882e-05	166.5	8.655	0.05	8.65522	0.0500119	3.02622e-09	1570	83.1
1570	27	7.46496e-05	166.744	8.66	0.05	8.65999	0.0500152	2.79318e-09	1570	83.1
1570	27	6.9688e-05	166.304	8.665	0.05	8.66514	0.0500097	2.79686e-09	1570	83.1
1570	28	6.82309e-05	166.414	8.67	0.05	8.6702	0.0500133	2.89041e-09	1570	83.1
1570	27	6.88978e-05	165.911	8.675	0.05	8.67494	0.050012	2.89669e-09	1570	83.1
1570	27	7.29242e-05	166.464	8.68	0.05	8.6801	0.0500037	3.00369e-09	1570	83.1
1570	27	8.00723e-05	166.295	8.685	0.05	8.68509	0.0500028	3.01806e-09	1570	83.1
1570	27	8.44305e-05	166.629	8.69	0.05	8.69027	0.0499997	2.898e-09	1570	83.1
1570	27	9.13726e-05	167.075	8.695	0.05	8.69497	0.0500081	2.99556e-09	1570	83.1
1570	27	9.56661e-05	167.69	8.7	0.05	8.70011	0.050006	2.99026e-09	1570	83.1
1570	27	9.89356e-05	167.272	8.705	0.05	8.70505	0.0500138	2.85749e-09	1570	83.1
1570	27	0.000100236	167.727	8.71	0.05	8.71022	0.0500031	2.91895e-09	1570	83.1
1570	27	0.000100475	167.124	8.715	0.05	8.715	0.0499996	3.02703e-09	1570	83.1
1570	27	0.00010174	167.266	8.72	0.05	8.72008	0.0499974	2.85469e-09	1570	83.1
1570	27	9.66628e-05	167.19	8.725	0.05	8.72511	0.0500084	2.93739e-09	1570	83.1
1570	27	9.26445e-05	167.063	8.73	0.05	8.72994	0.0500142	2.80508e-09	1570	83.1
1570	27	8.55645e-05	166.86	8.735	0.05	8.73503	0.0500088	2.80965e-09	1570	83.1
1570	27	7.96023e-05	167.155	8.74	0.05	8.74015	0.0500099	2.83932e-09	1570	83.1
1570	27	7.34013e-05	165.999	8.745	0.05	8.74521	0.0500072	2.9231e-09	1570	83.1
1570	27	7.17122e-05	165.873	8.75	0.05	8.74998	0.0500154	2.83925e-09	1570	83.1
1570	27	7.11493e-05	166.406	8.755	0.05	8.75501	0.0500082	2.89675e-09	1570	83.1
1570	27	7.15911e-05	166.035	8.76	0.05	8.76009	0.0500147	2.80468e-09	1570	83.1
1570	27	7.74864e-05	165.893	8.765	0.05	8.76524	0.050014	2.88881e-09	1570	83.1
1570	27	8.39599e-05	166.757	8.77	0.05	8.76992	0.0500117	2.89628e-09	1570	83.1
1570	27	8.88271e-05	167.282	8.775	0.05	8.77506	0.0500019	2.89782e-09	1570	83.1
1570	27	9.46299e-05	167.134	8.78	0.05	8.7801	0.0500032	3.02371e-09	1570	83.1
1570	27	9.82183e-05	167.868	8.785	0.05	8.78487	0.0500026	2.86053e-09	1570	83.1
1570	27	0.000102175	167.319	8.79	0.05	8.79002	0.0500148	2.86335e-09	1570	83.1
1570	27	0.000102003	167.752	8.795	0.05	8.79501	0.0500088	2.83962e-09	1570	83.1
1570	27	0.000100786	167.919	8.8	0.05	8.80021	0.0500039	2.89117e-09	1570	83.1
1570	27	9.79439e-05	167.437	8.805	0.05	8.80496	0.0500022	2.96313e-09	1570	83.1
1570	27	9.24397e-05	167.271	8.81	0.05	8.81006	0.0500126	2.96714e-09	1570	83.1
1570	28	8.52842e-05	166.437	8.815	0.05	8.81517	0.050009	2.87382e-09	1570	83.1
1570	27	7.96116e-05	166.553	8.82	0.05	8.8199	0.0499987	2.84458e-09	1570	83.1
1570	27	7.35144e-05	166.692	8.825	0.05	8.825	0.0500049	2.83627e-09	1570	83.1
1570	27	7.13299e-05	165.733	8.83	0.05	8.83005	0.0500038	2.9272e-09	1570	83.1
1570	27	7.02323e-05	165.633	8.835	0.05	8.83515	0.0500049	2.86634e-09	1570	83.1
1570	27	7.32725e-05	165.562	8.84	0.05	8.84	0.050007	2.78163e-09	1570	83.1
1570	27	7.74244e-05	165.948	8.845	0.05	8.84511	0.0500043	2.79538e-09	1570	83.1
1570	27	8.17409e-05	166.222	8.85	0.05	8.85012	0.050019	2.96527e-09	1570	83.1
1570	27	8.86019e-05	166.221	8.855	0.05	8.85528	0.0500098	2.93932e-09	1570	83.1
1570	27	9.16851e-05	166.993	8.86	0.05	8.85996	0.0500065	2.98722e-09	1570	83.1
1570	27	9.67422e-05	167.6	8.865	0.05	8.86502	0.0500084	2.95571e-09	1570	83.1
1570	27	0.000101641	167.54	8.87	0.05	8.87016	0.0500015	2.94687e-09	1570	83.1
1570	27	0.000102536	167.32	8.875	0.05	8.87491	0.0500046	2.94002e-09	1570	83.1
1570	27	0.000100072	167.496	8.88	0.05	8.88012	0.0499969	2.93272e-09	1570	83.1
1570	27	9.40611e-05	167.151	8.885	0.05	8.88522	0.0500082	2.88765e-09	1570	83.1
1570	27	9.14749e-05	167.446	8.89	0.05	8.89026	0.0500088	2.81622e-09	1570	83.1
1570	27	8.50711e-05	167.242	8.895	0.05	8.89496	0.0500052	2.94476e-09	1570	83.1
1570	27	7.60404e-05	166.235	8.9	0.05	8.90007	0.050008	2.8544e-09	1570	83.1
1570	27	7.29843e-05	165.946	8.905	0.05	8.90514	0.0500093	2.74899e-09	1570	83.1
1570	27	7.14567e-05	165.746	8.91	0.05	8.91027	0.050003	2.92789e-09	1570	83.1
1570	27	7.31434e-05	166.027	8.915	0.05	8.91497	0.0500011	2.76223e-09	1570	83.1
1570	27	7.7297e-05	166.438	8.92	0.05	8.92	0.0500092	2.90133e-09	1570	83.1
1570	27	8.12853e-05	166.257	8.925	0.05	8.92525	0.0500178	2.80632e-09	1570	83.1
1570	27	8.59823e-05	166.644	8.93	0.05	8.93	0.050008	2.81069e-09	1570	83.1
1570	27	9.26995e-05	167.151	8.935	0.05	8.93504	0.0500046	2.83469e-09	1570	83.1
1570	27	9.70475e-05	167.091	8.94	0.05	8.94009	0.0500075	2.95978e-09	1570	83.1
1570	27	9.88869e-05	167.693	8.945	0.05	8.94516	0.0499919	2.98304e-09	1570	83.1
1570	27	0.000101415	167.185	8.95	0.05	8.94994	0.050004	3.00323e-09	1570	83.1
1570	27	0.000100101	167.236	8.955	0.05	8.95498	0.049999	3.04147e-09	1570	83.1
1570	27	9.64174e-05	166.333	8.96	0.05	8.96015	0.050008	2.88291e-09	1570	83.1
1570	27	9.38093e-05	166.243	8.965	0.05	8.96485	0.0499991	2.92279e-09	1570	83.1
1570	27	9.01091e-05	166.39	8.97	0.05	8.96996	0.0499982	2.82632e-09	1570	83.1
1570	27	8.22356e-05	166.57	8.975	0.05	8.97504	0.0500036	2.79977e-09	1570	83.1
1570	27	7.73285e-05	166.473	8.98	0.05	8.98012	0.0499988	2.92657e-09	1570	83.1
1570	27	7.23429e-05	166.014	8.985	0.05	8.9849	0.0500038	2.90439e-09	1570	83.1
1570	27	7.20189e-05	165.763	8.99	0.05	8.99007	0.0500017	2.81106e-09	1570	83.1
1570	27	7.4261e-05	165.572	8.995	0.05	8.99508	0.0500032	2.8161e-09	1570	83.1
1570	27	7.54754e-05	165.9	9	0.05	9.00014	0.0499979	2.95729e-09	1570	83.1
1570	27	7.99244e-05	166.698	9.005	0.05	9.00497	0.050002	2.99286e-09	1570	83.1
1570	27	8.46809e-05	166.258	9.01	0.05	9.0101	0.0500065	2.80049e-09	1570	83.1
1570	27	9.21063e-05	167.071	9.015	0.05	9.01511	0.050001	2.99611e-09	1570	83.1
1570	27	9.56176e-05	167.727	9.02	0.05	9.01993	0.0500077	2.8809e-09	1570	83.1
1570	27	9.71792e-05	167.104	9.025	0.05	9.025	0.050002	2.95542e-09	1570	83.1
1570	27	9.81261e-05	167.216	9.03	0.05	9.03015	0.0500108	3.01828e-09	1570	83.1
1570	27	0.000100931	167.753	9.035	0.05	9.03532	0.0500026	3.09232e-09	1570	83.1
1570	27	0.000102226	167.589	9.04	0.05	9.04005	0.0500028	2.94248e-09	1570	83.1
1570	27	9.51347e-05	167.554	9.045	0.05	9.04506	0.0500033	2.86266e-09	1570	83.1
1570	27	8.35848e-05	166.595	9.05	0.05	9.05015	0.0500012	2.87728e-09	1570	83.1
1570	27	7.72777e-05	166.058	9.055	0.05	9.05523	0.050006	2.94187e-09	1570	83.1
1570	27	7.59357e-05	166.232	9.06	0.05	9.05994	0.0500038	2.97244e-09	1570	83.1
1570	27	7.21406e-05	165.757	9.065	0.05	9.06508	0.0500028	2.96021e-09	1570	83.1
1570	27	7.08497e-05	165.799	9.07	0.05	9.07014	0.0500036	2.79775e-09	1570	83.1
1570	27	7.1669e-05	165.037	9.075	0.05	9.0749	0.0500064	2.93317e-09	1570	83.1
1570	27	7.50198e-05	166.472	9.08	0.05	9.08002	0.0500101	2.86433e-09	1570	83.1
1570	27	8.0254e-05	166.574	9.085	0.05	9.08512	0.0500044	2.79404e-09	1570	83.1
1570	27	8.5443e-05	166.984	9.09	0.05	9.09025	0.0500031	2.823e-09	1570	83.1
1570	27	9.17931e-05	166.362	9.095	0.05	9.09501	0.0500083	3.02004e-09	1570	83.1
1570	27	9.72947e-05	167.12	9.1	0.05	9.10007	0.0500078	3.00664e-09	1570	83.1
1570	27	0.000101284	167.19	9.105	0.05	9.10516	0.0499957	2.89698e-09	1570	83.1
1570	27	0.000101711	167.705	9.11	0.05	9.11025	0.0500051	3.01114e-09	1570	83.1
1570	27	9.81927e-05	167.331	9.115	0.05	9.115	0.0500085	3.0843e-09	1570	83.1
1570	27	9.66858e-05	167.436	9.12	0.05	9.12004	0.0500083	2.93919e-09	1570	83.1
1570	27	9.11674e-05	166.664	9.125	0.05	9.12511	0.0500147	3.00125e-09	1570	83.1
1570	27	8.92277e-05	166.272	9.13	0.05	9.12989	0.0500106	2.92321e-09	1570	83.1
1570	27	8.43936e-05	166.411	9.135	0.05	9.13501	0.0500132	2.82727e-09	1570	83.1
1570	27	7.86231e-05	166.669	9.14	0.05	9.14008	0.0500169	2.94102e-09	1570	83.1
1570	27	7.6901e-05	166.963	9.145	0.05	9.14516	0.0500064	2.98417e-09	1570	83.1
1570	27	7.5583e-05	166.03	9.15	0.05	9.14995	0.0500129	2.79784e-09	1570	83.1
1570	27	7.398e-05	166.362	9.155	0.05	9.15502	0.0500169	2.80928e-09	1570	83.1
1570	27	7.50126e-05	166.401	9.16	0.05	9.16016	0.0500123	2.84923e-09	1569.9	83.1
1570	27	7.71355e-05	166.276	9.165	0.05	9.16494	0.050001	2.85681e-09	1570	83.1
1570	27	8.19401e-05	166.625	9.17	0.05	9.16996	0.0500074	2.80503e-09	1570	83.1
1570	27	8.6642e-05	166.394	9.175	0.05	9.17507	0.0500066	2.76277e-09	1570	83.1
1570	27	9.19335e-05	166.939	9.18	0.05	9.1801	0.0500047	2.90754e-09	1570	83.1
1570	27	9.54238e-05	167.542	9.185	0.05	9.18486	0.0500075	2.84876e-09	1570	83.1
1570	27	0.000103098	167.632	9.19	0.05	9.19003	0.050006	2.88669e-09	1570	83.1
1570	27	0.000102824	167.936	9.195	0.05	9.19511	0.0500098	2.85438e-09	1570	83.1
1570	27	0.000102026	167.675	9.2	0.05	9.20021	0.0499989	2.99415e-09	1570	83.1
1570	27	0.000100366	167.226	9.205	0.05	9.20492	0.0500023	2.85922e-09	1570	83.1
1570	27	9.77863e-05	167.405	9.21	0.05	9.21005	0.0500099	2.91578e-09	1570	83.1
1570	27	8.75437e-05	166.832	9.215	0.05	9.21516	0.0500068	2.92369e-09	1570	83.1
1570	27	7.95119e-05	166.944	9.22	0.05	9.21996	0.0500024	2.93518e-09	1570	83.1
1570	27	7.42495e-05	165.948	9.225	0.05	9.22506	0.0500042	2.89955e-09	1570	83.1
1570	27	7.13059e-05	166.032	9.23	0.05	9.23012	0.0500051	2.86906e-09	1570	83.1
1570	27	7.09262e-05	166.426	9.235	0.05	9.23521	0.050006	2.79383e-09	1570	83.1
1570	27	7.40764e-05	166.106	9.24	0.05	9.24007	0.050005	2.73148e-09	1570	83.1
1570	27	7.756e-05	165.88	9.245	0.05	9.24512	0.0499999	2.76935e-09	1570	83.1
1570	27	8.35847e-05	166.028	9.25	0.05	9.25016	0.0500022	2.7663e-09	1570	83.1
1570	27	8.79074e-05	166.195	9.255	0.05	9.25518	0.0500059	2.86795e-09	1570	83.1
1570	27	9.26327e-05	166.961	9.26	0.05	9.25998	0.0500065	2.91149e-09	1570	83.1
1570	27	9.60779e-05	167.259	9.265	0.05	9.26505	0.0500048	2.855e-09	1570	83.1
1570	27	0.000101326	167.308	9.27	0.05	9.27022	0.0499975	2.83446e-09	1570	83.1
1570	27	0.000102824	167.355	9.275	0.05	9.27491	0.050006	2.85249e-09	1570	83.1
1570	27	0.000102121	167.352	9.28	0.05	9.28	0.0500041	2.91204e-09	1570	83.1
1570	27	9.83748e-05	166.665	9.285	0.05	9.28506	0.0499932	2.91454e-09	1570	83.1
1570	27	8.82767e-05	166.391	9.29	0.05	9.29019	0.0500053	2.9247e-09	1570	83.1
1570	27	8.42797e-05	166.261	9.295	0.05	9.29494	0.050004	2.81267e-09	1570	83.1
1570	27	8.21011e-05	165.864	9.3	0.05	9.30004	0.0500041	2.85312e-09	1570	83.1
1570	27	7.57505e-05	165.881	9.305	0.05	9.30517	0.0500074	2.77472e-09	1570	83.1
1570	27	7.66581e-05	166.581	9.31	0.05	9.30994	0.0500102	2.83337e-09	1570	83.1
1570	27	7.6504e-05	165.999	9.315	0.05	9.315	0.0500082	2.89614e-09	1570	83.1
1570	27	7.53486e-05	165.858	9.32	0.05	9.32003	0.0500039	2.75522e-09	1570	83.1
1570	28	8.00005e-05	166.755	9.325	0.05	9.3251	0.0500029	2.94282e-09	1570	83.1
1570	27	8.46484e-05	167.091	9.33	0.05	9.32994	0.0499985	2.96183e-09	1570	83.1
1570	27	9.20871e-05	166.603	9.335	0.05	9.33502	0.0500023	2.88141e-09	1570	83.1
1570	27	9.35509e-05	166.84	9.34	0.05	9.34007	0.0499959	2.88598e-09	1570	83.1
1570	27	9.55854e-05	167.351	9.345	0.05	9.34522	0.0500001	2.9839e-09	1570	83.1
1570	27	0.000101107	167.091	9.35	0.05	9.34991	0.0500082	2.85261e-09	1570	83.1
1570	27	0.000102226	167.559	9.355	0.05	9.35495	0.0500075	2.84419e-09	1570	83.1
1570	27	0.00010226	167.378	9.36	0.05	9.36013	0.0500087	2.88832e-09	1570	83.1
1570	27	0.000100637	166.892	9.365	0.05	9.3649	0.050016	2.98293e-09	1570	83.1
1570	27	9.30041e-05	166.613	9.37	0.05	9.37002	0.0500068	2.83994e-09	1570	83.1
1570	27	8.65136e-05	166.83	9.375	0.05	9.37507	0.0499981	2.80546e-09	1570	83.1
1570	27	8.1737e-05	166.418	9.38	0.05	9.38017	0.0500077	2.73994e-09	1570	83.1
1570	27	7.36939e-05	166.205	9.385	0.05	9.38499	0.0500117	2.74791e-09	1570	83.1
1570	27	7.434e-05	165.686	9.39	0.05	9.3901	0.0500091	2.832e-09	1570	83.1
1570	27	7.52797e-05	166.572	9.395	0.05	9.39516	0.050003	2.74326e-09	1570	83.1
1570	27	7.75606e-05	166.693	9.4	0.05	9.40024	0.0500049	2.94589e-09	1570	83.1
1570	27	7.80984e-05	166.193	9.405	0.05	9.405	0.0499975	2.81555e-09	1570	83.1
1570	27	8.25831e-05	166.472	9.41	0.05	9.41014	0.0500038	2.86474e-09	1570	83.1
1570	27	8.90721e-05	166.987	9.415	0.05	9.41517	0.050006	2.99441e-09	1570	83.1
1570	27	9.31702e-05	167.48	9.42	0.05	9.41995	0.0500016	2.82547e-09	1570	83.1
1570	27	9.86262e-05	166.888	9.425	0.05	9.42505	0.050004	2.86247e-09	1570	83.1
1570	27	0.00010053	167.181	9.43	0.05	9.43008	0.0500021	2.82629e-09	1570	83.1
1570	27	9.64467e-05	167.037	9.435	0.05	9.4352	0.0500061	2.82905e-09	1570	83.1
1570	27	9.28069e-05	166.87	9.44	0.05	9.43991	0.0499971	2.80642e-09	1570	83.1
1570	27	8.71901e-05	166.642	9.445	0.05	9.44505	0.0500063	2.80652e-09	1570	83.1
1570	27	8.16048e-05	166.525	9.45	0.05	9.45015	0.0500039	2.88473e-09	1570	83.1
1570	27	7.93034e-05	165.964	9.455	0.05	9.45489	0.0500109	2.80956e-09	1570	83.1
1570	27	7.90585e-05	165.653	9.46	0.05	9.45986	0.0500052	2.9095e-09	1570	83.1
1570	27	7.91281e-05	166.366	9.465	0.05	9.46502	0.0500083	2.94114e-09	1570	83.1
1570	27	7.55713e-05	166.535	9.47	0.05	9.47005	0.0500024	2.95368e-09	1570	83.1
1570	27	7.51531e-05	166.014	9.475	0.05	9.47493	0.0500106	2.92122e-09	1570	83.1
1570	27	7.6238e-05	165.898	9.48	0.05	9.47998	0.0500091	2.79538e-09	1570	83.1
1570	27	8.10625e-05	166.241	9.485	0.05	9.48514	0.0500083	2.78206e-09	1570	83.1
1570	27	8.52972e-05	166.564	9.49	0.05	9.49022	0.0500079	2.79448e-09	1570	83.1
1570	27	9.06676e-05	166.291	9.495	0.05	9.49494	0.0500037	2.85008e-09	1570	83.1
1570	27	9.51053e-05	167.121	9.5	0.05	9.50003	0.0500101	3.00978e-09	1570	83.1
1570	27	9.76128e-05	167.191	9.505	0.05	9.50517	0.0500069	2.84429e-09	1570	83.1
1570	27	0.000101063	167.26	9.51	0.05	9.50991	0.0500075	3.03907e-09	1570	83.1
1570	27	0.000100851	167.215	9.515	0.05	9.51502	0.0500107	3.05864e-09	1570	83.1
1570	27	0.000101913	167.608	9.52	0.05	9.52009	0.0500043	2.87929e-09	1570	83.1
1570	27	9.51921e-05	167.434	9.525	0.05	9.52518	0.0499985	2.87589e-09	1570	83.1
1570	27	9.15845e-05	166.891	9.53	0.05	9.52993	0.0500014	2.89043e-09	1570	83.1
1570	27	8.47304e-05	166.958	9.535	0.05	9.53495	0.0499974	2.77951e-09	1570	83.1
1570	27	8.04985e-05	166.682	9.54	0.05	9.54012	0.0499988	2.9817e-09	1570	83.1
1570	27	7.5191e-05	166.443	9.545	0.05	9.54515	0.0500045	2.85898e-09	1570	83.1
1570	27	7.395e-05	165.7	9.55	0.05	9.54992	0.0499988	2.81168e-09	1570	83.1
1570	27	7.491e-05	165.983	9.555	0.05	9.55505	0.0500044	2.90816e-09	1570	83.1
1570	27	7.86851e-05	165.926	9.56	0.05	9.56011	0.0500084	2.96807e-09	1570	83.1
1570	27	8.25086e-05	167.373	9.565	0.05	9.56499	0.0500021	2.8472e-09	1570	83.1
1570	27	8.61719e-05	167.187	9.57	0.05	9.57003	0.0500072	2.99784e-09	1570	83.1
1570	27	9.10247e-05	166.879	9.575	0.05	9.57505	0.050005	3.0545e-09	1570	83.1
1570	27	9.56841e-05	167.635	9.58	0.05	9.58023	0.0500037	3.04903e-09	1570	83.1
1570	27	9.6483e-05	167.435	9.585	0.05	9.58495	0.0500043	3.07147e-09	1570	83.1
1570	27	0.000100005	168.034	9.59	0.05	9.59009	0.0500065	3.0344e-09	1570	83.1
1570	27	0.00010326	167.441	9.595	0.05	9.59513	0.0500079	2.90136e-09	1570	83.1
1570	27	9.96087e-05	167.348	9.6	0.05	9.60019	0.0500094	2.88649e-09	1570	83.1
1570	27	9.21033e-05	166.759	9.605	0.05	9.60499	0.0500093	2.98514e-09	1570	83.1
1570	27	8.84091e-05	166.637	9.61	0.05	9.61011	0.0500052	2.88755e-09	1570	83.1
1570	27	8.23955e-05	166.784	9.615	0.05	9.61518	0.0499977	2.78749e-09	1570	83.1
1570	27	8.29077e-05	165.89	9.62	0.05	9.62003	0.0499944	2.78547e-09	1570	83.1
1570	27	7.62975e-05	166.267	9.625	0.05	9.625	0.0500115	2.90516e-09	1570	83.1
1570	27	7.50116e-05	165.902	9.63	0.05	9.63013	0.0500085	2.73244e-09	1570	83.1
1570	27	7.62571e-05	165.836	9.635	0.05	9.63522	0.05001	2.75582e-09	1570	83.1
1570	27	7.73789e-05	165.787	9.64	0.05	9.63994	0.050007	2.82057e-09	1570	83.1
1570	27	7.91326e-05	166.622	9.645	0.05	9.64508	0.050006	2.92038e-09	1570	83.1
1570	27	8.37981e-05	165.962	9.65	0.05	9.65016	0.0500059	2.80692e-09	1570	83.1
1570	27	8.45466e-05	165.893	9.655	0.05	9.65489	0.0500024	2.85685e-09	1570	83.1
1570	27	9.41482e-05	167.106	9.66	0.05	9.66001	0.0500001	2.9554e-09	1570	83.1
1570	27	9.80776e-05	166.801	9.665	0.05	9.6651	0.0500001	2.94402e-09	1570	83.1
1570	27	9.73403e-05	166.361	9.67	0.05	9.67022	0.0500017	3.00741e-09	1570	83.1
1570	27	9.78608e-05	167.094	9.675	0.05	9.675	0.0500054	2.89382e-09	1570	83.1
1570	27	0.00010182	167.493	9.68	0.05	9.6801	0.0500109	2.88783e-09	1570	83.1
1570	27	0.000101798	166.5	9.685	0.05	9.68516	0.0500108	2.83836e-09	1570	83.1
1570	27	9.61152e-05	167.097	9.69	0.05	9.69026	0.0500102	2.8603e-09	1570	83.1
1570	27	9.25056e-05	166.631	9.695	0.05	9.69509	0.05001	2.93692e-09	1570	83.1
1570	27	8.70778e-05	166.594	9.7	0.05	9.70016	0.0500015	2.8203e-09	1570	83.1
1570	27	8.10678e-05	165.82	9.705	0.05	9.70513	0.0500026	2.82392e-09	1570	83.1
1570	27	7.69771e-05	166.076	9.71	0.05	9.70996	0.0500004	2.84588e-09	1570	83.1
1570	27	7.62722e-05	166.782	9.715	0.05	9.715	0.0500044	2.7138e-09	1570	83.1
1570	27	7.4812e-05	166.252	9.72	0.05	9.72016	0.0500023	2.72209e-09	1570	83.1
1570	27	7.70922e-05	165.929	9.725	0.05	9.72531	0.0500032	2.83542e-09	1570	83.1
1570	27	8.14986e-05	166.46	9.73	0.05	9.73001	0.0500039	2.82619e-09	1570	83.1
1570	27	8.54436e-05	166.847	9.735	0.05	9.73506	0.0500047	2.88179e-09	1570	83.1
1570	27	9.31087e-05	167.097	9.74	0.05	9.74025	0.0500087	2.83642e-09	1570	83.1
1570	27	9.71177e-05	167.042	9.745	0.05	9.74531	0.0500032	2.82087e-09	1570	83.1
1570	27	9.65514e-05	167.982	9.75	0.05	9.74997	0.0500088	2.80633e-09	1570	83.1
1570	27	9.90316e-05	167.626	9.755	0.05	9.75514	0.0500146	2.8247e-09	1570	83.1
1570	27	0.000101731	167.078	9.76	0.05	9.76022	0.0500064	2.93728e-09	1570	83.1
1570	27	0.000101461	167.309	9.765	0.05	9.7649	0.0500077	2.82706e-09	1570	83.1
1570	27	9.83276e-05	167.371	9.77	0.05	9.77001	0.0500109	2.99443e-09	1570	83.1
1570	27	9.02025e-05	166.896	9.775	0.05	9.77509	0.0500089	2.78879e-09	1570	83.1
1570	27	8.65158e-05	166.614	9.78	0.05	9.78019	0.0500058	2.85624e-09	1570	83.1
1570	27	8.19141e-05	166.56	9.785	0.05	9.78495	0.0500093	2.77429e-09	1570	83.1
1570	27	7.66508e-05	166.65	9.79	0.05	9.79002	0.0500088	2.83366e-09	1570	83.1
1570	27	7.60628e-05	166.293	9.795	0.05	9.79512	0.050002	2.84487e-09	1570	83.1
1570	27	7.53974e-05	166.625	9.8	0.05	9.79983	0.0500068	2.87223e-09	1570	83.1
1570	27	7.63966e-05	165.741	9.805	0.05	9.80496	0.0500052	2.82158e-09	1570	83.1
1570	27	8.17142e-05	166.204	9.81	0.05	9.8101	0.0500168	2.80201e-09	1570	83.1
1570	27	8.73803e-05	166.223	9.815	0.05	9.81512	0.050008	2.90144e-09	1570	83.1
1570	27	9.35115e-05	166.578	9.82	0.05	9.81996	0.0500115	2.99253e-09	1570	83.1
1570	27	9.68003e-05	167.563	9.825	0.05	9.82505	0.0500102	3.02035e-09	1570	83.1
1570	27	0.000102266	167.992	9.83	0.05	9.83015	0.0500077	2.90517e-09	1570	83.1
1570	27	0.000100226	166.903	9.835	0.05	9.83516	0.0500031	2.82926e-09	1570	83.1
1570	27	0.000101437	167.173	9.84	0.05	9.83999	0.0500054	2.95905e-09	1570	83.1
1570	27	9.65633e-05	166.865	9.845	0.05	9.84504	0.0500053	2.99309e-09	1570	83.1
1570	27	9.42151e-05	166.509	9.85	0.05	9.85015	0.0500132	3.0184e-09	1570	83.1
1570	27	8.90598e-05	167.119	9.855	0.05	9.85494	0.0500095	2.9677e-09	1570	83.1
1570	27	8.36019e-05	166.467	9.86	0.05	9.85998	0.0500066	2.77072e-09	1570	83.1
1570	27	7.81147e-05	166.108	9.865	0.05	9.86506	0.0500114	2.87447e-09	1570	83.1
1570	27	7.4093e-05	166.284	9.87	0.05	9.8702	0.0500061	2.89203e-09	1570	83.1
1570	27	7.27625e-05	166.378	9.875	0.05	9.87498	0.050002	2.83669e-09	1570	83.1
1570	27	7.38983e-05	166.103	9.88	0.05	9.88007	0.0500103	2.79152e-09	1570	83.1
1570	27	7.70008e-05	165.826	9.885	0.05	9.88518	0.0500051	2.77004e-09	1570	83.1
1570	27	8.01544e-05	166.089	9.89	0.05	9.89028	0.0500047	2.92718e-09	1570	83.1
1570	27	8.28712e-05	166.608	9.895	0.05	9.895	0.0500014	2.94883e-09	1570	83.1
1570	27	8.82814e-05	166.913	9.9	0.05	9.90005	0.0500015	2.98483e-09	1570	83.1
1570	27	9.63631e-05	167.106	9.905	0.05	9.90523	0.0500048	2.8273e-09	1570	83.1
1570	27	9.88203e-05	167.624	9.91	0.05	9.90998	0.0500087	2.95346e-09	1570	83.1
1570	27	9.97895e-05	167.3	9.915	0.05	9.91503	0.0500057	2.95744e-09	1570	83.1
1570	27	9.95355e-05	167.252	9.92	0.05	9.92012	0.0500059	2.84887e-09	1570	83.1
1570	27	9.84637e-05	167.125	9.925	0.05	9.92521	0.0500045	2.84782e-09	1570	83.1
1570	27	9.63704e-05	167.178	9.93	0.05	9.93	0.0500027	2.86347e-09	1570	83.1
1570	27	9.21789e-05	166.95	9.935	0.05	9.93512	0.0500097	2.82221e-09	1570	83.1
1570	27	8.4479e-05	166.062	9.94	0.05	9.94023	0.050007	2.80044e-09	1570	83.1
1570	27	7.90207e-05	166.52	9.945	0.05	9.945	0.0500077	2.79111e-09	1570	83.1
1570	27	7.50995e-05	165.338	9.95	0.05	9.95009	0.050003	2.86226e-09	1570	83.1
1570	27	7.31509e-05	165.919	9.955	0.05	9.95513	0.0500156	2.91525e-09	1570	83.1
1570	27	7.55172e-05	166.986	9.96	0.05	9.96025	0.0500074	2.75464e-09	1570	83.1
1570	27	7.7597e-05	166.323	9.965	0.05	9.96502	0.0500025	2.76764e-09	1570	83.1
1570	27	8.18742e-05	165.735	9.97	0.05	9.97011	0.0500003	2.81911e-09	1570	83.1 8E+6
1570	27	8.53308e-05	166.579	9.975	0.05	9.97519	0.0500044	2.82108e-09	1570	83.1
[truncated: 5 more rows]
